# Supplementary material for: An N-glycoproteomic site-mapping analysis reveals glycoprotein alterations in esophageal squamous cell carcinoma
Source: J Transl Med. 2022 Jun 25;20:285. doi: 10.1186/s12967-022-03489-2 (PMC9233802; doi:10.1186/s12967-022-03489-2)
Supplement: Supplementary file 1 — Additional file 1: Table S1. Clinical features of the ESCC patients cohort. Table S2. Differentially expressed proteins in proteomics (fold change > 1.5 and p value < 0.05). Table S3. Motif logo and model. Table S4. Differentially expressed glycoproteins and glycosylation sites in normalized N-glycoproteomics (fold change > 1.5 and p value < 0.05). Table S5. The details of the 179 significantly regulated glycoproteins in ESCC. Table S6. Label-free based N-glycoproteomics of ESCC cell line normalized by proteomes. Table S7. LCA enriched glycoproteins in ESCC cell line. Table S8. UEA-I enriched glycoproteins in ESCC cell line. [file 12967_2022_3489_MOESM1_ESM.xlsx]

## Sheet: Table S1
Table S1. Clinical features of the ESCC patients cohort for N-glycoproteomics
Sample#	Sample ID	Gender	Pathological type	Age at diagnosis	Tumor Grade	Gross Morphology	Location	Experiment	Pathological T	Pathological N	Clinical M	TNM stage（the Eighth Edition）
#1	BDESCCPRO041	male	squamous cell carcinoma	69	G2	ulcer	lower	1	T3	N0	M0	Ⅱ A
#2	BDESCCPRO055	female	squamous cell carcinoma	62	G2	medullary	mid	2	T2	N0	M0	Ⅱ A
#3	BDESCCPRO069	male	squamous cell carcinoma	50	G2	ulcer	lower	2	T3	N0	M0	Ⅱ A
#4	BDESCCPRO068	male	squamous cell carcinoma	64	G2	infiltrate	mid	2	T3	N0	M0	Ⅱ A
#5	BDESCCPRO061	male	squamous cell carcinoma	55	G2-3	medullary	mid	2	T2	N1	M0	Ⅲ A
#6	BDESCCPRO046	male	squamous cell carcinoma	58	G2	ulcer	mid	1	T3	N1	M0	III B
#7	BDESCCPRO047	female	squamous cell carcinoma	70	G2	ulcer	mid	1	T3	N1	M0	Ⅲ B
#10	BDESCCPRO044	male	squamous cell carcinoma	66	G3	mushroom	lower	1	T3	N3	M0	Ⅳ A

## Sheet: Table S2
Table S2. Differentially expressed proteins in proteomics (fold change>1.5 and p value <0.05)
Protein accession	Protein description	T/N Ratio	Regulated Type	T/N P value	Gene name	MW [kDa]	N1	N10	N6	N7	N2	N5	N4	N3	T1	T10	T6	T7	T2	T5	T4	T3	Subcellular localization	Biological Process	Cellular Component	Molecular Function	KEGG KO No.	KEGG Gene	KEGG pathway	IPR ID	Domain description	KOG category	KOG NO.	KOG description
P09651	Heterogeneous nuclear ribonucleoprotein A1 OS=Homo sapiens OX=9606 GN=HNRNPA1 PE=1 SV=5	1.685	Up	0.0023426	HNRNPA1	38.746	0.674	0.707	0.587	0.604	0.776	0.798	0.754	0.849	1.212	2.012	0.845	0.848	1.006	1.588	1.131	1.043	nucleus	single organism signaling; RNA transport; regulation of biological quality; cell surface receptor signaling pathway; positive regulation of biosynthetic process; nuclear transport; response to arsenic-containing substance; cellular metabolic process; regulation of telomere maintenance; cellular response to sodium arsenite; metabolic process; nucleobase-containing compound transport; negative regu…	intracellular organelle; membrane; extracellular region part; vesicle; intracellular organelle part; cytoplasm; nuclear lumen; macromolecular complex; intracellular part; spliceosomal complex; cell; extracellular region; organelle part; membrane-enclosed lumen; extracellular exosome; organelle; intracellular membrane-bounded organelle; catalytic complex; nucleoplasm; nucleus; intracellular organe…	DNA binding; RNA binding; nucleoside phosphate binding; sequence-specific single stranded DNA binding; telomeric DNA binding; single-stranded DNA binding; protein binding; nucleotide binding; sequence-specific DNA binding; single-stranded telomeric DNA binding; single-stranded RNA binding; heterocyclic compound binding; organic cyclic compound binding; telomeric repeat-containing RNA binding; bin…	K12741	HNRNPA1_3; heterogeneous nuclear ribonucleoprotein A1/A3	hsa03040 Spliceosome;	IPR000504; IPR012677;	RNA recognition motif domain; Nucleotide-binding alpha-beta plait domain;	R	KOG0118	FOG: RRM domain
P80723	Brain acid soluble protein 1 OS=Homo sapiens OX=9606 GN=BASP1 PE=1 SV=2	1.844	Up	0.0113648	BASP1	22.693	0.686	0.718	0.519	0.642	0.735	0.706	0.654	0.802	1.106	1.936	0.842	1.236	2.368	0.633	0.831	1.122	nucleus	reproductive process; segmentation; brain development; positive regulation of growth; neural nucleus development; substantia nigra development; positive regulation of multicellular organismal process; single organism reproductive process; negative regulation of macromolecule biosynthetic process; embryo development; zygotic determination of anterior/posterior axis, embryo; nervous system developm…	membrane; extracellular region part; cell periphery; cell junction; cytoplasm; vesicle; growth cone; intracellular part; nuclear body; cell; organelle part; non-membrane-bounded organelle; membrane-enclosed lumen; cytoskeleton; extracellular exosome; nucleoplasm; intracellular organelle lumen; nuclear speck; cell part; intracellular; extracellular vesicle; neuron projection; membrane-bounded orga…	organic cyclic compound binding; regulatory region DNA binding; heterocyclic compound binding; DNA binding; regulatory region nucleic acid binding; transcription corepressor activity; transcription regulatory region DNA binding; binding; nucleic acid binding; transcription factor activity, transcription factor binding; protein domain specific binding; protein binding; transcription cofactor activ…	K17272
O60443	Gasdermin-E OS=Homo sapiens OX=9606 GN=GSDME PE=1 SV=2	1.574	Up	0.0069241	GSDME	54.554	0.938	0.936	0.61	0.902	0.721	0.665	0.788	0.643	1.472	0.958	1.005	1.377	1.238	0.639	1.124	1.952	cytoplasm	regulation of cellular process; single-multicellular organism process; regulation of cell death; inner ear receptor cell differentiation; regulation of cell proliferation; regulation of signaling; cellular developmental process; positive regulation of intracellular signal transduction; regulation of programmed cell death; positive regulation of apoptotic process; single-organism process; neurogen…	membrane; cell periphery; cell part; intracellular; cytoplasm; intracellular part; cell; cytosol; plasma membrane; cytoplasmic part;
P21980	Protein-glutamine gamma-glutamyltransferase 2 OS=Homo sapiens OX=9606 GN=TGM2 PE=1 SV=2	0.527	Down	1.8256e-06	TGM2	77.328	1.345	1.399	1.631	1.325	1.663	1.288	1.184	1.417	0.657	0.538	0.824	0.796	1.059	0.687	0.556	0.816	cytoplasm	cellular component biogenesis; single organism signaling; regulation of cell death; regulation of biological quality; gland development; tube formation; regulation of defense response; cellular metabolic process; metabolic process; macromolecular complex assembly; regulation of I-kappaB kinase/NF-kappaB signaling; metal ion homeostasis; protein metabolic process; macromolecule metabolic process; …	membrane; extracellular region part; endoplasmic reticulum; cell periphery; cell junction; vesicle; cytoplasm; intrinsic component of membrane; intracellular part; cell; extracellular exosome; focal adhesion; membrane part; intracellular; cell part; adherens junction; extracellular vesicle; cell-substrate junction; membrane-bounded organelle; cell-substrate adherens junction; intracellular organe…	nucleoside phosphate binding; nucleoside binding; ion binding; protein binding; nucleotide binding; transferase activity, transferring amino-acyl groups; organic cyclic compound binding; heterocyclic compound binding; ribonucleoside binding; transferase activity, transferring acyl groups; carbohydrate derivative binding; catalytic activity; ribonucleotide binding; binding; purine ribonucleoside b…	K05625	TGM2; transglutaminase 2 [EC:2.3.2.13]	hsa05016 Huntington's disease;	IPR008958; IPR013783; IPR002931; IPR014756; IPR001102;	Transglutaminase, C-terminal; Immunoglobulin-like fold; Transglutaminase-like; Immunoglobulin E-set; Transglutaminase, N-terminal;
Q14315	Filamin-C OS=Homo sapiens OX=9606 GN=FLNC PE=1 SV=3	0.388	Down	7.5102e-05	FLNC	291.02	0.896	1.128	2.334	1.443	2.329	1.462	1.166	1.936	0.505	0.541	1.01	0.686	0.707	0.539	0.33	0.611	cytoplasm	developmental process; muscle cell development; cellular component biogenesis; striated muscle cell differentiation; cell junction assembly; cellular component organization; muscle fiber development; cellular developmental process; single-organism cellular process; single-organism process; cell development; cell differentiation; cell junction organization; striated muscle cell development; cellul…	membrane; cell junction; cell periphery; myofibril; cytoplasm; supramolecular fiber; intracellular part; Z disc; sarcoplasm; supramolecular complex; cell; I band; organelle part; non-membrane-bounded organelle; cytoskeleton; focal adhesion; intracellular; cell part; adherens junction; contractile fiber; cell-substrate junction; cell-substrate adherens junction; intracellular organelle; intracellu…	actin filament binding; cytoskeletal protein binding; binding; macromolecular complex binding; actin binding; protein binding; ankyrin binding; protein complex binding;	K04437	FLNA; filamin	hsa05132 Salmonella infection; hsa05205 Proteoglycans in cancer; hsa04010 MAPK signaling pathway; hsa04510 Focal adhesion;	IPR013783; IPR014756; IPR001715;	Immunoglobulin-like fold; Immunoglobulin E-set; Calponin homology domain;	Z	KOG0518	Actin-binding cytoskeleton protein, filamin
P29992	Guanine nucleotide-binding protein subunit alpha-11 OS=Homo sapiens OX=9606 GN=GNA11 PE=1 SV=2	0.598	Down	1.3748e-08	GNA11	42.123	1.214	1.184	1.426	1.267	1.331	1.356	1.486	1.466	0.769	0.785	0.909	0.774	0.902	0.837	0.664	0.772	cytoplasm	single organism signaling; regulation of biological quality; blood coagulation; regulation of melanocyte differentiation; single-organism process; response to wounding; response to external stimulus; G-protein coupled acetylcholine receptor signaling pathway; signal transduction; heart development; cell communication; detection of stimulus; regulation of circadian rhythm; response to radiation; a…	membrane; extracellular region part; extrinsic component of membrane; organelle membrane; membrane protein complex; cell periphery; vesicle; cytoplasm; non-motile cilium; macromolecular complex; intracellular part; extrinsic component of cytoplasmic side of plasma membrane; cell; 9+0 non-motile cilium; cytoplasmic side of plasma membrane; cytoplasmic side of membrane; organelle part; lysosomal me…	nucleoside phosphate binding; receptor binding; G-protein beta/gamma-subunit complex binding; hydrolase activity, acting on acid anhydrides; hydrolase activity; type 2A serotonin receptor binding; protein binding; signal transducer activity; heterocyclic compound binding; organic cyclic compound binding; pyrophosphatase activity; ribonucleotide binding; catalytic activity; binding; purine ribonuc…	K04635	GNA11; guanine nucleotide-binding protein subunit alpha-11	hsa04925 Aldosterone synthesis and secretion; hsa05142 Chagas disease (American trypanosomiasis); hsa05200 Pathways in cancer; hsa04540 Gap junction; hsa04912 GnRH signaling pathway; hsa05146 Amoebiasis; hsa04022 cGMP-PKG signaling pathway; hsa04020 Calcium signaling pathway; hsa04270 Vascular smooth muscle contraction; hsa04730 Long-term depression; hsa04911 Insulin secretion; hsa04725 Cholinerg…	IPR027417; IPR011025;	P-loop containing nucleoside triphosphate hydrolase; G protein alpha subunit, helical insertion;	T	KOG0085	G protein subunit Galphaq/Galphay, small G protein superfamily
P08123	Collagen alpha-2(I) chain OS=Homo sapiens OX=9606 GN=COL1A2 PE=1 SV=7	0.532	Down	0.0029388	COL1A2	129.31	1.389	1.737	1.274	1.159	1.415	0.921	0.99	2.4	0.775	0.609	0.741	0.679	1.653	0.671	0.352	0.527	extracellular	cellular component biogenesis; single organism signaling; response to acid chemical; blood coagulation; regulation of biological quality; localization of cell; collagen fibril organization; cell surface receptor signaling pathway; blood vessel development; cellular response to transforming growth factor beta stimulus; multicellular organism metabolic process; single-organism process; cellular res…	collagen type I trimer; extracellular space; endoplasmic reticulum; extracellular region part; banded collagen fibril; vesicle; cytoplasm; fibrillar collagen trimer; macromolecular complex; intracellular part; supramolecular fiber; cell; supramolecular complex; extracellular matrix component; organelle part; collagen trimer; membrane-enclosed lumen; extracellular exosome; intracellular organelle …	extracellular matrix structural constituent; protein binding, bridging; identical protein binding; growth factor binding; binding; ion binding; platelet-derived growth factor binding; metal ion binding; cation binding; protein binding; binding, bridging; SMAD binding; structural molecule activity;	K06236	COL1A; collagen, type I, alpha	hsa04611 Platelet activation; hsa04151 PI3K-Akt signaling pathway; hsa04510 Focal adhesion; hsa04512 ECM-receptor interaction; hsa04974 Protein digestion and absorption; hsa04933 AGE-RAGE signaling pathway in diabetic complications; hsa05146 Amoebiasis;	IPR000885;	Fibrillar collagen, C-terminal;	W	KOG3544	Collagens (type IV and type XIII), and related proteins
Q96GX5	Serine/threonine-protein kinase greatwall OS=Homo sapiens OX=9606 GN=MASTL PE=1 SV=1	3.127	Up	0.043516	MASTL	97.318					0.575	0.315	0.442	0.439					1.405	2.811	0.772	0.55	nucleus	single organism signaling; positive regulation of cellular protein metabolic process; reproductive process; peptidyl-serine modification; positive regulation of ubiquitin-protein transferase activity; mitotic nuclear division; single-organism process; negative regulation of phosphatase activity; cellular metabolic process; negative regulation of protein modification process; phosphate-containing …	intracellular organelle; cell surface furrow; intracellular non-membrane-bounded organelle; cytoskeletal part; cell division site; intracellular organelle part; cytoplasm; nuclear lumen; intracellular part; cell; cell division site part; organelle part; non-membrane-bounded organelle; organelle; cytoskeleton; intracellular membrane-bounded organelle; membrane-enclosed lumen; microtubule organizin…	nucleoside phosphate binding; protein phosphatase binding; phosphotransferase activity, alcohol group as acceptor; protein binding; protein kinase activity; protein phosphatase 2A binding; organic cyclic compound binding; heterocyclic compound binding; kinase activity; catalytic activity; ribonucleotide binding; binding; purine ribonucleoside binding; anion binding; phosphatase binding; adenyl ri…	K16309			IPR000719; IPR011009; IPR000961;	Protein kinase domain; Protein kinase-like domain; AGC-kinase, C-terminal;	TR	KOG0606	Microtubule-associated serine/threonine kinase and related proteins
P01876	Immunoglobulin heavy constant alpha 1 OS=Homo sapiens OX=9606 GN=IGHA1 PE=1 SV=2	0.618	Down	0.0113618	IGHA1	37.654	1.198	2.598	0.849	0.893	1.291	1.476	1.131	0.915	0.853	0.782	0.576	0.583	0.905	0.71	0.982	1.001	extracellular	single organism signaling; regulation of leukocyte activation; immunoglobulin mediated immune response; regulation of biological quality; localization of cell; cell surface receptor signaling pathway; defense response to other organism; regulation of respiratory burst; single-organism process; regulation of lymphocyte activation; cellular metabolic process; multicellular organismal homeostasis; r…	membrane; extracellular space; extracellular region part; external side of plasma membrane; cell periphery; immunoglobulin complex, circulating; vesicle; macromolecular complex; cell; IgA immunoglobulin complex, circulating; extracellular exosome; dimeric IgA immunoglobulin complex; cell part; membrane part; extracellular vesicle; membrane-bounded organelle; side of membrane; immunoglobulin compl…	protein binding; antigen binding; binding;				IPR007110; IPR013783; IPR003597;	Immunoglobulin-like domain; Immunoglobulin-like fold; Immunoglobulin C1-set;
Q63HN8	E3 ubiquitin-protein ligase RNF213 OS=Homo sapiens OX=9606 GN=RNF213 PE=1 SV=3	1.816	Up	0.0040421	RNF213	591.4	0.764	0.755	0.658	0.718	0.584	0.666	0.665	0.636	1.004	2.171	0.727	0.912	1.222	1.707	1.188	0.96	plasma membrane	cellular component biogenesis; negative regulation of signal transduction; blood vessel development; regulation of signaling; single-organism process; regulation of non-canonical Wnt signaling pathway; protein autoubiquitination; cellular metabolic process; angiogenesis; metabolic process; regulation of cell communication; cellular component assembly; negative regulation of non-canonical Wnt sign…	intracellular organelle; membrane; intracellular non-membrane-bounded organelle; intracellular organelle part; cytoplasm; nuclear lumen; intracellular part; nucleolus; cytosol; cell; organelle part; non-membrane-bounded organelle; membrane-enclosed lumen; organelle; intracellular membrane-bounded organelle; nucleus; intracellular organelle lumen; intracellular; cell part; membrane-bounded organel…	ubiquitin-like protein transferase activity; ion binding; hydrolase activity, acting on acid anhydrides; hydrolase activity; protein binding; nucleoside-triphosphatase activity; zinc ion binding; ATPase activity; pyrophosphatase activity; transition metal ion binding; catalytic activity; binding; ubiquitin-protein transferase activity; cation binding; metal ion binding; hydrolase activity, acting…				IPR003593; IPR001841; IPR018957; IPR013083; IPR027417;	AAA+ ATPase domain; Zinc finger, RING-type; Zinc finger, C3HC4 RING-type; Zinc finger, RING/FYVE/PHD-type; P-loop containing nucleoside triphosphate hydrolase;
P84157	Matrix-remodeling-associated protein 7 OS=Homo sapiens OX=9606 GN=MXRA7 PE=1 SV=1	0.523	Down	0.00027959	MXRA7	21.466	1.121	0.842	1.676	1.549	1.799	1.253	1.158	1.995	0.853	0.477	0.831	0.896	0.964	0.689	0.591	0.652	extracellular		intrinsic component of membrane; membrane; integral component of membrane; membrane part;
P09874	Poly [ADP-ribose] polymerase 1 OS=Homo sapiens OX=9606 GN=PARP1 PE=1 SV=4	1.571	Up	0.0041626	PARP1	113.08	0.902	0.786	0.701	0.761	0.684	0.79	0.74	0.721	1.021	1.804	0.758	1.103	1.452	1.483	0.944	0.992	nucleus	cellular component biogenesis; single organism signaling; regulation of cell death; DNA ligation; negative regulation of nucleotide metabolic process; nucleotide-excision repair; response to beta-amyloid; regulation of neuron apoptotic process; positive regulation of biosynthetic process; positive regulation of muscle hypertrophy; cellular metabolic process; positive regulation of membrane depola…	membrane; nuclear chromosome, telomeric region; chromosome, telomeric region; cytoplasm; macromolecular complex; intracellular part; cell; organelle part; chromosomal part; non-membrane-bounded organelle; membrane-enclosed lumen; nucleoplasm; intracellular organelle lumen; nuclear chromosome part; cell part; intracellular; chromosome; membrane-bounded organelle; organelle lumen; intracellular org…	nucleoside phosphate binding; protein N-terminus binding; DNA ligase (ATP) activity; receptor binding; protein kinase binding; ligase activity; protein binding; hormone receptor binding; DNA ligase activity; heterocyclic compound binding; organic cyclic compound binding; histone deacetylase binding; identical protein binding; catalytic activity; binding; steroid hormone receptor binding; cation b…	K10798	PARP; poly [ADP-ribose] polymerase [EC:2.4.2.30]	hsa04210 Apoptosis; hsa03410 Base excision repair; hsa04064 NF-kappa B signaling pathway;	IPR008893; IPR004102; IPR012982; IPR001510; IPR012317; IPR001357;	WGR domain; Poly(ADP-ribose) polymerase, regulatory domain; PADR1 domain; Zinc finger, PARP-type; Poly(ADP-ribose) polymerase, catalytic domain; BRCT domain;	KLO	KOG1037	NAD+ ADP-ribosyltransferase Parp, required for poly-ADP ribosylation of nuclear proteins
Q14210	Lymphocyte antigen 6D OS=Homo sapiens OX=9606 GN=LY6D PE=1 SV=1	0.608	Down	0.025459	LY6D	13.286	1.065	1.289	0.993	1.374	1.229	1.449	1.712	1.864	0.762	0.302	1.311	1.275	0.489	0.359	1.598	0.573	extracellular	post-translational protein modification; single-multicellular organism process; leukocyte activation; cellular developmental process; cellular protein metabolic process; single-organism process; biosynthetic process; response to stimulus; cellular metabolic process; lipoprotein metabolic process; organic substance metabolic process; lymphocyte differentiation; biological adhesion; metabolic proce…	membrane; cell periphery; cell part; membrane part; anchored component of membrane; intrinsic component of membrane; cell surface; cell; extracellular region; plasma membrane;		K06846			IPR016054;	Ly-6 antigen/uPA receptor-like;
P02452	Collagen alpha-1(I) chain OS=Homo sapiens OX=9606 GN=COL1A1 PE=1 SV=5	0.543	Down	0.0045218	COL1A1	138.94	1.295	1.686	1.349	1.249	1.287	0.836	0.899	2.379	0.731	0.501	0.766	0.684	1.629	0.695	0.353	0.599	extracellular	single organism signaling; cellular component biogenesis; collagen fibril organization; chordate embryonic development; positive regulation of biosynthetic process; response to organophosphorus; metabolic process; macromolecular complex assembly; trabecula formation; positive regulation of canonical Wnt signaling pathway; embryo development; cellular response to stimulus; skin development; cellul…	collagen type I trimer; endoplasmic reticulum; extracellular space; banded collagen fibril; extracellular region part; cytoplasmic vesicle; vesicle; cytoplasm; fibrillar collagen trimer; macromolecular complex; supramolecular fiber; intracellular part; supramolecular complex; cell; extracellular matrix component; organelle part; collagen trimer; membrane-enclosed lumen; intracellular organelle lu…	extracellular matrix structural constituent; identical protein binding; growth factor binding; binding; ion binding; platelet-derived growth factor binding; metal ion binding; cation binding; protein binding; structural molecule activity;	K06236	COL1A; collagen, type I, alpha	hsa04611 Platelet activation; hsa04151 PI3K-Akt signaling pathway; hsa04510 Focal adhesion; hsa04512 ECM-receptor interaction; hsa04974 Protein digestion and absorption; hsa04933 AGE-RAGE signaling pathway in diabetic complications; hsa05146 Amoebiasis;	IPR001007; IPR000885;	VWFC domain; Fibrillar collagen, C-terminal;	W	KOG3544	Collagens (type IV and type XIII), and related proteins
Q6ZMR5	Transmembrane protease serine 11A OS=Homo sapiens OX=9606 GN=TMPRSS11A PE=1 SV=1	0.487	Down	0.021595	TMPRSS11A	47.568	1.494	1.113	1.483	1.734					0.553	0.378	1.184	0.724					Golgi apparatus	metabolic process; single-organism cellular process; single-organism process; proteolysis; protein metabolic process; macromolecule metabolic process; primary metabolic process; cellular process; cell cycle; organic substance metabolic process;	membrane; intrinsic component of plasma membrane; plasma membrane part; membrane part; cell part; cell periphery; intrinsic component of membrane; integral component of plasma membrane; cell; extracellular region; integral component of membrane; plasma membrane;	serine-type endopeptidase activity; endopeptidase activity; peptidase activity; catalytic activity; serine hydrolase activity; serine-type peptidase activity; peptidase activity, acting on L-amino acid peptides; hydrolase activity;	K09750			IPR009003; IPR001254; IPR000082;	Peptidase S1, PA clan; Serine proteases, trypsin domain; SEA domain;	E	KOG3627	Trypsin
Q9Y291	"""28S ribosomal protein S33, mitochondrial OS=Homo sapiens OX=9606 GN=MRPS33 PE=1 SV=1"""	1.832	Up	0.024961	MRPS33	12.629					0.919	0.726	0.541	0.591					1.943	1.14	0.973	1.032	nucleus	cellular component organization; peptide metabolic process; cellular protein metabolic process; single-organism process; biosynthetic process; organonitrogen compound biosynthetic process; cellular metabolic process; protein complex disassembly; organic substance metabolic process; metabolic process; cellular protein complex disassembly; cellular nitrogen compound metabolic process; macromolecule…	membrane; organelle membrane; small ribosomal subunit; cytoplasm; macromolecular complex; intracellular part; cell; organellar ribosome; organelle part; non-membrane-bounded organelle; mitochondrial envelope; membrane-enclosed lumen; intracellular organelle lumen; ribosomal subunit; intracellular; cell part; organelle inner membrane; membrane-bounded organelle; mitochondrial inner membrane; organ…	structural constituent of ribosome; structural molecule activity;	K17411					T	KOG4104	Ganglioside-induced differentiation associated protein 3
A0A0C4DH31	Immunoglobulin heavy variable 1-18 OS=Homo sapiens OX=9606 GN=IGHV1-18 PE=3 SV=1	0.588	Down	0.043657	IGHV1-18	12.82	1.202	1.854	0.861	1.407					1.065	0.678	0.593	0.792					extracellular	single organism signaling; regulation of leukocyte activation; immunoglobulin mediated immune response; cell surface receptor signaling pathway; defense response to other organism; single-organism process; regulation of lymphocyte activation; response to biotic stimulus; establishment of localization; phagocytosis; complement activation; response to external stimulus; metabolic process; signal tr…	membrane; extracellular region part; extracellular space; external side of plasma membrane; cell periphery; immunoglobulin complex, circulating; immunoglobulin complex; macromolecular complex; cell; extracellular region; plasma membrane; blood microparticle; plasma membrane part; cell part; membrane part; cell surface; protein complex; side of membrane;	immunoglobulin receptor binding; protein binding; receptor binding; antigen binding; binding;				IPR007110; IPR013783; IPR013106;	Immunoglobulin-like domain; Immunoglobulin-like fold; Immunoglobulin V-set domain;
P49585	Choline-phosphate cytidylyltransferase A OS=Homo sapiens OX=9606 GN=PCYT1A PE=1 SV=2	1.607	Up	0.002816	PCYT1A	41.731	0.737	0.722	0.661	0.779	0.845	0.745	0.783	0.757	1.116	1.076	1.04	1.852	1.154	1.621	1.043	0.788	nucleus	phosphatidylcholine metabolic process; glycerolipid metabolic process; phospholipid biosynthetic process; ammonium ion metabolic process; single-organism process; biosynthetic process; cellular lipid metabolic process; organonitrogen compound biosynthetic process; cellular metabolic process; phosphate-containing compound metabolic process; lipid biosynthetic process; organic substance metabolic p…	intracellular organelle; membrane; nuclear outer membrane-endoplasmic reticulum membrane network; endoplasmic reticulum; nuclear envelope; cell periphery; organelle envelope; intracellular organelle part; cytoplasm; endomembrane system; intracellular part; cytosol; cell; organelle part; plasma membrane; intracellular membrane-bounded organelle; organelle; nucleus; endoplasmic reticulum part; glyc…	ammonium ion binding; protein dimerization activity; ion binding; protein binding; choline-phosphate cytidylyltransferase activity; calmodulin binding; phosphatidylcholine binding; cytidylyltransferase activity; quaternary ammonium group binding; identical protein binding; nucleotidyltransferase activity; catalytic activity; protein homodimerization activity; binding; phospholipid binding; lipid …	K00968	PCYT1; choline-phosphate cytidylyltransferase [EC:2.7.7.15]	hsa05231 Choline metabolism in cancer; hsa00440 Phosphonate and phosphinate metabolism; hsa00564 Glycerophospholipid metabolism; hsa01100 Metabolic pathways;	IPR014729; IPR004821;	Rossmann-like alpha/beta/alpha sandwich fold; Cytidyltransferase-like domain;	I	KOG2804	Phosphorylcholine transferase/cholinephosphate cytidylyltransferase
O14981	TATA-binding protein-associated factor 172 OS=Homo sapiens OX=9606 GN=BTAF1 PE=1 SV=2	2.017	Up	0.00185725	BTAF1	206.89					0.588	0.764	0.663	0.555					1.649	1.397	1.133	1.005	plasma membrane	regulation of cellular process; regulation of macromolecule metabolic process; regulation of nucleobase-containing compound metabolic process; negative regulation of cellular process; negative regulation of cellular metabolic process; negative regulation of biological process; negative regulation of RNA metabolic process; negative regulation of transcription, DNA-templated; regulation of RNA bios…	membrane-enclosed lumen; intracellular membrane-bounded organelle; organelle; intracellular organelle; nucleus; nucleoplasm; intracellular organelle lumen; cell part; intracellular; intracellular organelle part; nuclear lumen; intracellular part; membrane-bounded organelle; cell; organelle part; organelle lumen; nuclear part;	nucleoside phosphate binding; hydrolase activity, acting on acid anhydrides; hydrolase activity; transcription factor activity, sequence-specific DNA binding; heterocyclic compound binding; organic cyclic compound binding; pyrophosphatase activity; catalytic activity; ribonucleotide binding; binding; nucleic acid binding transcription factor activity; purine ribonucleoside binding; anion binding;…	K15192			IPR011989; IPR014001; IPR027417; IPR001650; IPR016024; IPR022707; IPR000330;	Armadillo-like helical; Helicase superfamily 1/2, ATP-binding domain; P-loop containing nucleoside triphosphate hydrolase; Helicase, C-terminal; Armadillo-type fold; Domain of unknown function DUF3535; SNF2-related, N-terminal domain;	K	KOG0392	SNF2 family DNA-dependent ATPase domain-containing protein
Q13601	KRR1 small subunit processome component homolog OS=Homo sapiens OX=9606 GN=KRR1 PE=1 SV=4	1.662	Up	0.0009963	KRR1	43.664	0.71	0.673	0.75	0.739	0.506	0.754	0.856	0.915	1.101	1.879	0.945	1.036	0.759	1.439	1.38	1.269	nucleus	rRNA metabolic process; RNA processing; ncRNA processing; cellular component biogenesis; ribonucleoprotein complex biogenesis; cellular aromatic compound metabolic process; ribosomal small subunit biogenesis; nitrogen compound metabolic process; ribosome biogenesis; organic cyclic compound metabolic process; primary metabolic process; cellular metabolic process; organic substance metabolic proces…	intracellular organelle; membrane; extracellular region part; intracellular non-membrane-bounded organelle; cytoplasm; intracellular organelle part; macromolecular complex; nuclear lumen; intracellular part; nucleolus; cell; extracellular region; organelle part; non-membrane-bounded organelle; preribosome; organelle; intracellular membrane-bounded organelle; membrane-enclosed lumen; nucleoplasm; …	organic cyclic compound binding; heterocyclic compound binding; RNA binding; protein binding; binding; nucleic acid binding;	K06961			IPR004087; IPR004088;	K Homology domain; K Homology domain, type 1;	JD	KOG2874	rRNA processing protein
Q13753	Laminin subunit gamma-2 OS=Homo sapiens OX=9606 GN=LAMC2 PE=1 SV=2	1.8	Up	0.0154779	LAMC2	130.97	1.049	0.755	0.832	0.78	0.469	0.488	0.671	0.578	2.107	0.426	1	1.386	1.455	1.165	0.994	1.586	extracellular	cellular component biogenesis; regulation of cellular process; cell junction assembly; cellular component organization; single-multicellular organism process; positive regulation of cell migration; regulation of cell proliferation; positive regulation of locomotion; single-organism process; positive regulation of cell motility; basement membrane organization; biological adhesion; cellular compone…	membrane; extracellular space; extracellular region part; cell cortex; cell periphery; cytoplasm; cytoplasmic region; macromolecular complex; intracellular part; cell; extracellular matrix component; extracellular region; laminin complex; basement membrane; laminin-2 complex; basal lamina; extracellular matrix; intracellular; cell part; perinuclear region of cytoplasm; proteinaceous extracellular…	carbohydrate derivative binding; anion binding; protein binding; heparin binding; glycosaminoglycan binding; sulfur compound binding; binding; ion binding;	K06246	LAMC2; laminin, gamma 2	hsa05222 Small cell lung cancer; hsa04151 PI3K-Akt signaling pathway; hsa05200 Pathways in cancer; hsa04510 Focal adhesion; hsa04512 ECM-receptor interaction; hsa05146 Amoebiasis; hsa05145 Toxoplasmosis;	IPR000034; IPR002049; IPR000742;	Laminin IV; Laminin EGF domain; EGF-like domain;	W	KOG1836	Extracellular matrix glycoprotein Laminin subunits alpha and gamma
P53985	Monocarboxylate transporter 1 OS=Homo sapiens OX=9606 GN=SLC16A1 PE=1 SV=3	1.734	Up	3.9492e-06	SLC16A1	53.944	0.685	0.678	0.695	0.959	0.752	0.558	0.775	0.752	1.681	1.231	1.252	0.98	1.032	1.29	1.327	1.355	plasma membrane	organic hydroxy compound transport; regulation of biological quality; localization of cell; glucose homeostasis; regulation of insulin secretion; regulation of signaling; behavioral response to nutrient; single-organism process; regulation of secretion; cellular metabolic process; establishment of localization; behavior; response to external stimulus; metabolic process; regulation of cell communi…	membrane; extracellular region part; cell periphery; cell junction; vesicle; cytoplasm; intrinsic component of membrane; intracellular part; integral component of plasma membrane; cell; organelle part; non-membrane-bounded organelle; cytoskeleton; extracellular exosome; microtubule organizing center; microtubule cytoskeleton; intracellular; cell part; membrane part; extracellular vesicle; membran…	organic acid transmembrane transporter activity; active transmembrane transporter activity; secondary active transmembrane transporter activity; ion transmembrane transporter activity; symporter activity; protein dimerization activity; organic hydroxy compound transmembrane transporter activity; substrate-specific transporter activity; protein binding; monocarboxylic acid transmembrane transporte…	K08179			IPR020846;	Major facilitator superfamily domain;	G	KOG2504	Monocarboxylate transporter
Q15427	Splicing factor 3B subunit 4 OS=Homo sapiens OX=9606 GN=SF3B4 PE=1 SV=1	1.596	Up	0.00015859	SF3B4	44.385	0.805	0.716	0.683	0.75	0.813	0.772	0.751	1.001	1.078	1.872	0.93	1.182	1.308	1.477	1.152	1.042	nucleus	positive regulation of RNA splicing; regulation of cellular process; positive regulation of mRNA processing; cellular aromatic compound metabolic process; regulation of macromolecule metabolic process; regulation of nucleobase-containing compound metabolic process; cellular metabolic process; organic substance metabolic process; mRNA splicing, via spliceosome; metabolic process; RNA splicing, via…	intracellular organelle; intracellular organelle part; macromolecular complex; nuclear lumen; intracellular part; spliceosomal complex; cell; organelle part; organelle; intracellular membrane-bounded organelle; membrane-enclosed lumen; nucleoplasm; nucleus; intracellular organelle lumen; cell part; intracellular; ribonucleoprotein complex; intracellular ribonucleoprotein complex; membrane-bounded…	organic cyclic compound binding; heterocyclic compound binding; RNA binding; nucleoside phosphate binding; binding; nucleic acid binding; protein binding; nucleotide binding; small molecule binding;	K12831	SF3B4; splicing factor 3B subunit 4	hsa03040 Spliceosome;	IPR034158; IPR000504; IPR012677; IPR034159;	SF3B4, RNA recognition motif 1; RNA recognition motif domain; Nucleotide-binding alpha-beta plait domain; SF3B4, RNA recognition motif 2;	A	KOG0131	Splicing factor 3b, subunit 4
Q8TDL5	BPI fold-containing family B member 1 OS=Homo sapiens OX=9606 GN=BPIFB1 PE=1 SV=1	0.414	Down	0.023419	BPIFB1	52.441	1.675	1.835	1.967	0.486	0.516	3.323	0.73	1.433	0.94	0.471	0.557	0.51	0.423	0.825	0.482	0.743	extracellular	regulation of cellular process; negative regulation of signal transduction; negative regulation of toll-like receptor signaling pathway; regulation of signaling; humoral immune response; response to external biotic stimulus; negative regulation of biological process; negative regulation of cellular process; regulation of response to stress; response to stimulus; regulation of defense response; re…	extracellular exosome; organelle; extracellular space; extracellular region part; vesicle; extracellular vesicle; membrane-bounded organelle; extracellular region; extracellular organelle;	lipid binding; binding;				IPR017943; IPR001124; IPR017942;	Bactericidal permeability-increasing protein, alpha/beta domain; Lipid-binding serum glycoprotein, C-terminal; Lipid-binding serum glycoprotein, N-terminal;	V	KOG4160	BPI/LBP/CETP family protein
P02748	Complement component C9 OS=Homo sapiens OX=9606 GN=C9 PE=1 SV=2	0.604	Down	3.6441e-05	C9	63.173	1.161	1.469	1.263	1.141	1.814	1.052	1.469	1.275	0.941	0.777	0.851	0.68	1.003	0.619	0.78	0.778	extracellular	cellular component biogenesis; regulation of biological quality; immunoglobulin mediated immune response; killing by symbiont of host cells; multi-organism cellular process; modification of morphology or physiology of other organism; regulation of defense response; disruption by symbiont of host cell; complement activation; metabolic process; killing of cells in other organism involved in symbiot…	membrane; extracellular space; extracellular region part; membrane protein complex; other organism cell; cell periphery; vesicle; cytoplasm; macromolecular complex; intrinsic component of membrane; intracellular part; integral component of plasma membrane; cell; extracellular exosome; cell part; membrane part; intracellular; extracellular vesicle; other organism; other organism membrane; membrane…	protein binding; binding;	K04000	C9; complement component 9	hsa05322 Systemic lupus erythematosus; hsa04610 Complement and coagulation cascades; hsa05146 Amoebiasis; hsa05020 Prion diseases;	IPR020864; IPR009030;	Membrane attack complex component/perforin (MACPF) domain; Growth factor receptor cysteine-rich domain;
Q6UWP8	Suprabasin OS=Homo sapiens OX=9606 GN=SBSN PE=1 SV=2	0.51	Down	0.0117758	SBSN	60.54	1.33	1.55	1.264	1.354	1.27	0.866	2.189	1.829	0.619	0.281	1.239	0.888	0.402	0.211	1.612	0.686	extracellular		extracellular matrix; extracellular exosome; organelle; extracellular region part; vesicle; extracellular vesicle; membrane-bounded organelle; extracellular region; extracellular organelle;
Q01995	Transgelin OS=Homo sapiens OX=9606 GN=TAGLN PE=1 SV=4	0.336	Down	0.000117129	TAGLN	22.611	0.98	1.183	2.361	1.438	2.943	1.402	1.089	2.034	0.432	0.474	1.051	0.678	0.748	0.42	0.247	0.465	cytoplasm	developmental process; epithelium development; single-multicellular organism process; tissue development; system development; cellular developmental process; single-organism cellular process; single-organism process; multicellular organismal process; animal organ development; cell differentiation; muscle organ development; single-organism developmental process; muscle structure development; multi…	intracellular part; cell; cell part; intracellular; cytoplasm;	actin filament binding; cytoskeletal protein binding; binding; macromolecular complex binding; actin binding; protein binding; protein complex binding;	K20526			IPR001715;	Calponin homology domain;	Z	KOG2046	Calponin
O95715	C-X-C motif chemokine 14 OS=Homo sapiens OX=9606 GN=CXCL14 PE=1 SV=2	3.486	Up	0.033861	CXCL14	13.077	0.601	0.322	0.305	0.781	0.289	0.265	0.603	0.415	1.3	0.154	2.259	2.634	2.443	0.313	1.59	1.792	extracellular	single organism signaling; negative regulation of developmental process; positive regulation of cell migration; localization of cell; positive regulation of locomotion; single-organism process; response to external stimulus; signal transduction; cell communication; regulation of myoblast differentiation; regulation of localization; positive regulation of response to external stimulus; negative re…	organelle; intracellular membrane-bounded organelle; intracellular organelle; extracellular space; extracellular region part; cell part; intracellular; cytoplasm; endomembrane system; intracellular part; cell; membrane-bounded organelle; Golgi apparatus; extracellular region; cytoplasmic part;	cytokine activity; receptor binding; binding; chemokine receptor binding; cytokine receptor binding; protein binding; G-protein coupled receptor binding; chemokine activity;	K10033	CXCL14; C-X-C motif chemokine 14	hsa04060 Cytokine-cytokine receptor interaction;	IPR001811;	Chemokine interleukin-8-like domain;
O14802	DNA-directed RNA polymerase III subunit RPC1 OS=Homo sapiens OX=9606 GN=POLR3A PE=1 SV=2	1.822	Up	0.00077764	POLR3A	155.64	0.659	0.742	0.775	0.669					1.501	1.296	1.007	1.38					cytoplasm	positive regulation of type I interferon production; positive regulation of protein targeting to mitochondrion; nucleic acid-templated transcription; regulation of protein targeting; defense response to other organism; biosynthetic process; multi-organism cellular process; cellular metabolic process; regulation of mitochondrion organization; positive regulation of establishment of protein localiz…	intracellular organelle; membrane; DNA-directed RNA polymerase complex; nuclear DNA-directed RNA polymerase complex; transferase complex, transferring phosphorus-containing groups; intracellular organelle part; cytoplasm; RNA polymerase complex; macromolecular complex; nuclear lumen; intracellular part; transferase complex; cytosol; cell; organelle part; intracellular membrane-bounded organelle; …	DNA binding; 5'-3' RNA polymerase activity; RNA polymerase activity; ion binding; chromatin binding; heterocyclic compound binding; organic cyclic compound binding; nucleotidyltransferase activity; catalytic activity; binding; nucleic acid binding; DNA-directed 5'-3' RNA polymerase activity; cation binding; metal ion binding; transferase activity; transferase activity, transferring phosphorus-con…	K03018	RPC1; DNA-directed RNA polymerase III subunit RPC1 [EC:2.7.7.6]	hsa04623 Cytosolic DNA-sensing pathway; hsa00230 Purine metabolism; hsa03020 RNA polymerase; hsa00240 Pyrimidine metabolism; hsa05169 Epstein-Barr virus infection; hsa01100 Metabolic pathways;	IPR006592; IPR000722; IPR007080; IPR007081; IPR007066; IPR007083;	RNA polymerase, N-terminal; RNA polymerase, alpha subunit; RNA polymerase Rpb1, domain 1; RNA polymerase Rpb1, domain 5; RNA polymerase Rpb1, domain 3; RNA polymerase Rpb1, domain 4;	K	KOG0261	RNA polymerase III, large subunit
P06493	Cyclin-dependent kinase 1 OS=Homo sapiens OX=9606 GN=CDK1 PE=1 SV=3	2.52	Up	0.0092777	CDK1	34.095	0.459	0.549	0.64	0.586	0.432	0.507	0.543	0.449	1.048	2.617	0.601	1.039	0.909	2.854	0.698	0.728	cytoplasm	single organism signaling; cellular component biogenesis; negative regulation of cell cycle G1/S phase transition; regulation of cell death; regulation of gliogenesis; reproductive process; positive regulation of ubiquitin-protein transferase activity; positive regulation of biosynthetic process; cellular metabolic process; regulation of cell cycle process; cilium organization; positive regulatio…	membrane; nuclear chromosome, telomeric region; chromosome, telomeric region; extracellular region part; microtubule; transferase complex, transferring phosphorus-containing groups; vesicle; cytoplasm; macromolecular complex; supramolecular fiber; intracellular part; serine/threonine protein kinase complex; supramolecular complex; cell; protein kinase complex; organelle part; chromosomal part; no…	nucleoside phosphate binding; phosphotransferase activity, alcohol group as acceptor; protein binding; cyclin-dependent protein serine/threonine kinase activity; chromatin binding; protein kinase activity; Hsp70 protein binding; cyclin binding; heterocyclic compound binding; organic cyclic compound binding; kinase activity; ribonucleotide binding; catalytic activity; binding; purine ribonucleosid…	K02087	CDK1; cyclin-dependent kinase 1 [EC:2.7.11.22 2.7.11.23]	hsa04110 Cell cycle; hsa04540 Gap junction; hsa05168 Herpes simplex infection; hsa05169 Epstein-Barr virus infection; hsa04914 Progesterone-mediated oocyte maturation; hsa04115 p53 signaling pathway; hsa04114 Oocyte meiosis; hsa05203 Viral carcinogenesis;	IPR000719; IPR011009;	Protein kinase domain; Protein kinase-like domain;	R	KOG0594	Protein kinase PCTAIRE and related kinases
P33241	Lymphocyte-specific protein 1 OS=Homo sapiens OX=9606 GN=LSP1 PE=1 SV=1	1.717	Up	0.00133985	LSP1	37.191	1.052	0.807	0.568	0.842	0.554	0.701	0.636	0.618	1.157	1.113	0.872	1.634	1.478	1.858	0.994	0.817	nucleus	regulation of cellular process; single organism signaling; cellular response to stimulus; response to stress; single-organism cellular process; single-organism process; signaling; response to stimulus; chemotaxis; response to external stimulus; signal transduction; response to chemical; regulation of biological process; cell communication; cellular defense response; movement of cell or subcellula…	intracellular organelle; membrane; extracellular region part; intracellular non-membrane-bounded organelle; cell periphery; vesicle; intracellular part; cell; actin cytoskeleton; extracellular region; plasma membrane; non-membrane-bounded organelle; organelle; extracellular exosome; cytoskeleton; intracellular; cell part; extracellular vesicle; membrane-bounded organelle; extracellular organelle;	actin binding; protein binding; cytoskeletal protein binding; signal transducer activity; binding;	K14957	LSP1; lymphocyte-specific protein 1	hsa05152 Tuberculosis;			R	KOG3656	FOG: 7 transmembrane receptor
Q9Y2W2	WW domain-binding protein 11 OS=Homo sapiens OX=9606 GN=WBP11 PE=1 SV=1	1.58	Up	0.00130355	WBP11	69.997	0.744	0.772	0.775	0.844	0.632	0.809	0.774	0.769	1.19	1.69	0.925	1.006	1.238	1.635	1.084	0.9	nucleus	cellular component biogenesis; ribonucleoprotein complex biogenesis; positive regulation of protein targeting to mitochondrion; regulation of protein targeting; regulation of mitochondrion organization; cellular metabolic process; positive regulation of establishment of protein localization to mitochondrion; positive regulation of cellular component organization; metabolic process; rRNA processin…	intracellular organelle; intracellular organelle part; cytoplasm; nuclear lumen; macromolecular complex; intracellular part; spliceosomal complex; nuclear body; cytosol; cell; organelle part; membrane-enclosed lumen; organelle; intracellular membrane-bounded organelle; nucleoplasm; nucleus; intracellular organelle lumen; nuclear speck; intracellular; cell part; ribonucleoprotein complex; membrane…	organic cyclic compound binding; heterocyclic compound binding; DNA binding; RNA binding; enzyme regulator activity; protein phosphatase regulator activity; phosphatase regulator activity; binding; nucleic acid binding; single-stranded DNA binding; WW domain binding; protein binding; protein domain specific binding; molecular function regulator;	K12866	WBP11; WW domain-binding protein 11	hsa03040 Spliceosome;			S	KOG4672	Uncharacterized conserved low complexity protein
Q13424	Alpha-1-syntrophin OS=Homo sapiens OX=9606 GN=SNTA1 PE=1 SV=1	0.563	Down	0.044336	SNTA1	53.895					1.659	1.451	0.976	1.48					1.157	0.956	0.459	0.56	mitochondria	regulation of cellular process; actin filament-based movement; regulation of sodium ion transport; actin-mediated cell contraction; muscle system process; regulation of biological quality; regulation of macromolecule metabolic process; regulation of protein modification process; regulation of blood circulation; single-organism process; negative regulation of cellular metabolic process; negative r…	intracellular organelle; glycoprotein complex; membrane; intracellular non-membrane-bounded organelle; cell periphery; membrane protein complex; cell junction; neuromuscular junction; plasma membrane protein complex; cytoplasm; macromolecular complex; intracellular part; cell; plasma membrane; syntrophin complex; dystrophin-associated glycoprotein complex; synapse; non-membrane-bounded organelle;…	cytoskeletal protein binding; ATPase binding; binding; actin binding; ion channel binding; nitric-oxide synthase binding; protein binding; protein domain specific binding; structural molecule activity; calmodulin binding; PDZ domain binding; enzyme binding;				IPR011993; IPR001478; IPR001849;	PH domain-like; PDZ domain; Pleckstrin homology domain;	W	KOG3551	Syntrophins (type beta)
P02765	Alpha-2-HS-glycoprotein OS=Homo sapiens OX=9606 GN=AHSG PE=1 SV=1	0.558	Down	2.1053e-05	AHSG	39.324	1.404	1.519	1.161	1.337	1.135	1.606	1.19	1.559	0.911	0.682	0.685	0.829	0.49	0.683	0.736	1.072	extracellular	regulation of vesicle-mediated transport; negative regulation of developmental process; leukocyte activation; negative regulation of signal transduction; regulation of signaling; single-organism process; negative regulation of multicellular organismal process; regulation of bone mineralization; regulation of defense response; regulation of biomineral tissue development; establishment of localizat…	secretory granule lumen; extracellular space; extracellular region part; cytoplasmic vesicle; vesicle; cytoplasm; cytoplasmic vesicle part; intracellular part; cell; organelle part; extracellular exosome; membrane-enclosed lumen; vesicle lumen; intracellular organelle lumen; intracellular; cell part; secretory vesicle; extracellular vesicle; secretory granule; membrane-bounded organelle; organell…	enzyme regulator activity; kinase inhibitor activity; peptidase inhibitor activity; peptidase regulator activity; endopeptidase regulator activity; kinase regulator activity; enzyme inhibitor activity; molecular function regulator; endopeptidase inhibitor activity; cysteine-type endopeptidase inhibitor activity;				IPR000010; IPR025760;	Cystatin domain; Fetuin-A-type cystatin domain;
P14672	"""Solute carrier family 2, facilitated glucose transporter member 4 OS=Homo sapiens OX=9606 GN=SLC2A4 PE=1 SV=1"""	0.625	Down	0.0103354	SLC2A4	54.787					1.748	1.326	1.132	1.038					0.722	0.895	0.831	0.83	plasma membrane	regulation of biological quality; cellular developmental process; glucose homeostasis; single-organism process; biosynthetic process; cellular response to cytokine stimulus; establishment of localization; carbohydrate transmembrane transport; metabolic process; cellular response to peptide; carbohydrate derivative biosynthetic process; response to endogenous stimulus; glucose transport; macromole…	membrane; extracellular region part; external side of plasma membrane; organelle membrane; cytoplasmic vesicle; membrane microdomain; cell periphery; cytoplasm; vesicle; cytoplasmic vesicle part; intrinsic component of membrane; intracellular part; integral component of plasma membrane; cell; organelle part; T-tubule; extracellular exosome; trans-Golgi network transport vesicle; clathrin-coated v…	D-glucose transmembrane transporter activity; carbohydrate transmembrane transporter activity; glucose transmembrane transporter activity; sugar transmembrane transporter activity; binding; carbohydrate transporter activity; hexose transmembrane transporter activity; substrate-specific transporter activity; protein binding; monosaccharide transmembrane transporter activity; substrate-specific tra…	K07191	SLC2A4; MFS transporter, SP family, solute carrier family 2 (facilitated glucose transporter), member 4	hsa04068 FoxO signaling pathway; hsa04920 Adipocytokine signaling pathway; hsa04930 Type II diabetes mellitus; hsa04910 Insulin signaling pathway; hsa04931 Insulin resistance; hsa04152 AMPK signaling pathway;	IPR020846;	Major facilitator superfamily domain;	G	KOG0569	Permease of the major facilitator superfamily
Q08431	Lactadherin OS=Homo sapiens OX=9606 GN=MFGE8 PE=1 SV=2	0.607	Down	0.00156252	MFGE8	43.122	1.024	1.288	0.912	1.786	1.31	0.944	2.153	1.191	0.844	0.865	0.958	0.724	0.656	0.703	0.728	0.963	extracellular	regulation of vesicle-mediated transport; regulation of apoptotic cell clearance; blood vessel development; reproductive process; single-organism process; multi-organism cellular process; cellular metabolic process; establishment of localization; phagocytosis; positive regulation of cellular component organization; biological adhesion; angiogenesis; metabolic process; regulation of localization; …	membrane; extracellular space; extracellular region part; external side of plasma membrane; extrinsic component of membrane; cell periphery; vesicle; extrinsic component of plasma membrane; cell; extracellular region; plasma membrane; extracellular exosome; organelle; plasma membrane part; cell part; membrane part; extracellular vesicle; cell surface; membrane-bounded organelle; extracellular org…	cell adhesion molecule binding; modified amino acid binding; receptor binding; binding; phospholipid binding; ion binding; macromolecular complex binding; lipid binding; anion binding; protein binding; integrin binding; phosphatidylethanolamine binding; phosphatidylserine binding; protein complex binding;	K17253			IPR000421; IPR000742; IPR008979;	Coagulation factor 5/8 C-terminal domain; EGF-like domain; Galactose-binding domain-like;	WV	KOG1216	von Willebrand factor and related coagulation proteins
Q8N806	Putative E3 ubiquitin-protein ligase UBR7 OS=Homo sapiens OX=9606 GN=UBR7 PE=1 SV=2	1.623	Up	0.0125623	UBR7	47.998	0.602	0.901	0.814	0.715					1.247	1.529	0.918	1.228					cyto_nucl	metabolic process; protein modification by small protein conjugation; protein ubiquitination; cellular macromolecule metabolic process; cellular protein metabolic process; cellular protein modification process; macromolecule metabolic process; protein metabolic process; protein modification by small protein conjugation or removal; macromolecule modification; protein modification process; primary …		transition metal ion binding; catalytic activity; binding; ion binding; cation binding; metal ion binding; zinc ion binding; transferase activity;	K11979			IPR013083; IPR011011; IPR003126;	Zinc finger, RING/FYVE/PHD-type; Zinc finger, FYVE/PHD-type; Zinc finger, UBR-type;	R	KOG2752	Uncharacterized conserved protein, contains N-recognin-type Zn-finger
P55268	Laminin subunit beta-2 OS=Homo sapiens OX=9606 GN=LAMB2 PE=1 SV=2	0.427	Down	3.5539e-07	LAMB2	195.98	1.182	1.536	1.685	1.487	1.681	1.31	1.524	1.719	0.515	0.512	0.916	0.66	0.836	0.599	0.425	0.709	extracellular	neuromuscular junction development; visual perception; neuron development; cellular developmental process; Schwann cell differentiation; cellular component morphogenesis; neurogenesis; single-organism process; Schwann cell development; neurological system process; response to wounding; biological adhesion; response to external stimulus; cell part morphogenesis; axon extension involved in regenera…	laminin-11 complex; extracellular space; extracellular region part; vesicle; macromolecular complex; extracellular matrix component; extracellular region; synaptic cleft; synapse; laminin complex; basement membrane; extracellular exosome; organelle; basal lamina; extracellular matrix; extracellular vesicle; proteinaceous extracellular matrix; membrane-bounded organelle; protein complex; laminin-3…	cell adhesion molecule binding; receptor binding; binding; macromolecular complex binding; protein binding; integrin binding; structural molecule activity; protein complex binding;	K06243	LAMB2; laminin, beta 2	hsa05222 Small cell lung cancer; hsa04151 PI3K-Akt signaling pathway; hsa05200 Pathways in cancer; hsa04510 Focal adhesion; hsa04512 ECM-receptor interaction; hsa05146 Amoebiasis; hsa05145 Toxoplasmosis;	IPR013015; IPR002049; IPR000742; IPR008211;	Laminin IV type B; Laminin EGF domain; EGF-like domain; Laminin, N-terminal;	W	KOG0994	Extracellular matrix glycoprotein Laminin subunit beta
P08185	Corticosteroid-binding globulin OS=Homo sapiens OX=9606 GN=SERPINA6 PE=1 SV=1	0.644	Down	0.0017175	SERPINA6	45.14	1.139	1.441	1.164	1.224	2.101	1.25	1.127	0.823	0.849	0.943	0.882	0.706	0.85	0.611	0.802	0.97	plasma membrane	regulation of cellular process; negative regulation of endopeptidase activity; regulation of macromolecule metabolic process; single-organism process; negative regulation of cellular metabolic process; negative regulation of biological process; negative regulation of cellular process; negative regulation of hydrolase activity; establishment of localization; organic substance metabolic process; ne…	extracellular exosome; organelle; extracellular space; extracellular region part; vesicle; extracellular vesicle; membrane-bounded organelle; extracellular region; extracellular organelle;	organic cyclic compound binding; serine-type endopeptidase inhibitor activity; enzyme regulator activity; binding; peptidase inhibitor activity; peptidase regulator activity; lipid binding; endopeptidase regulator activity; molecular function regulator; enzyme inhibitor activity; endopeptidase inhibitor activity; steroid binding;	K04525			IPR023796;	Serpin domain;	V	KOG2392	Serpin
P05026	Sodium/potassium-transporting ATPase subunit beta-1 OS=Homo sapiens OX=9606 GN=ATP1B1 PE=1 SV=1	0.644	Down	0.00071837	ATP1B1	35.061	1.282	1.468	1.402	0.934	0.999	1.693	1.294	1.32	0.775	0.591	1.214	0.927	0.751	0.68	0.863	0.887	plasma membrane	single organism signaling; nucleoside metabolic process; regulation of biological quality; potassium ion homeostasis; cellular monovalent inorganic cation homeostasis; positive regulation of calcium ion transmembrane transport; cellular metabolic process; protein transport; cardiac conduction; biological adhesion; metabolic process; regulation of calcium ion transmembrane transporter activity; re…	basolateral plasma membrane; membrane; extracellular region part; apical plasma membrane; membrane microdomain; cell junction; cell-cell contact zone; cell periphery; vesicle; macromolecular complex; intrinsic component of membrane; integral component of plasma membrane; cell-cell junction; cell; cation-transporting ATPase complex; intercalated disc; ATPase dependent transmembrane transport compl…	ATPase coupled ion transmembrane transporter activity; potassium-transporting ATPase activity; nucleoside-triphosphatase regulator activity; primary active transmembrane transporter activity; protein kinase binding; sodium:potassium-exchanging ATPase activity; substrate-specific transporter activity; hydrolase activity, acting on acid anhydrides; monovalent inorganic cation transmembrane transpor…	K01540	ATP1B; sodium/potassium-transporting ATPase subunit beta	hsa04260 Cardiac muscle contraction; hsa04978 Mineral absorption; hsa04964 Proximal tubule bicarbonate reclamation; hsa04973 Carbohydrate digestion and absorption; hsa04022 cGMP-PKG signaling pathway; hsa04024 cAMP signaling pathway; hsa04919 Thyroid hormone signaling pathway; hsa04976 Bile secretion; hsa04970 Salivary secretion; hsa04911 Insulin secretion; hsa04960 Aldosterone-regulated sodium r…			P	KOG3927	Na+/K+ ATPase, beta subunit
Q9BUL9	Ribonuclease P protein subunit p25 OS=Homo sapiens OX=9606 GN=RPP25 PE=1 SV=1	1.551	Up	0.044605	RPP25	20.632					0.922	0.675	0.746	0.715					1.016	1.777	0.997	0.953	cyto_nucl	cellular component biogenesis; ribonucleoprotein complex biogenesis; cellular aromatic compound metabolic process; cellular metabolic process; organic substance metabolic process; metabolic process; heterocycle metabolic process; nucleobase-containing compound metabolic process; tRNA 5'-leader removal; rRNA processing; cellular nitrogen compound metabolic process; macromolecule metabolic process;…	intracellular organelle; intracellular non-membrane-bounded organelle; cytoskeletal part; intracellular organelle part; nuclear lumen; intracellular part; cell; organelle part; non-membrane-bounded organelle; membrane-enclosed lumen; cytoskeleton; organelle; intracellular membrane-bounded organelle; nucleus; nucleoplasm; microtubule organizing center; intracellular organelle lumen; microtubule cy…	RNA binding; ribonuclease P activity; endoribonuclease activity; protein binding; hydrolase activity; endoribonuclease activity, producing 5'-phosphomonoesters; heterocyclic compound binding; organic cyclic compound binding; tRNA-specific ribonuclease activity; endonuclease activity, active with either ribo- or deoxyribonucleic acids and producing 5'-phosphomonoesters; catalytic activity; binding…	K14525	RPP25; ribonucleases P/MRP protein subunit RPP25 [EC:3.1.26.5]	hsa03008 Ribosome biogenesis in eukaryotes; hsa03013 RNA transport;			S	KOG2567	Uncharacterized conserved protein
P08195	4F2 cell-surface antigen heavy chain OS=Homo sapiens OX=9606 GN=SLC3A2 PE=1 SV=3	2.048	Up	5.1327e-07	SLC3A2	67.993	0.721	0.635	0.683	0.727	0.494	0.597	0.676	0.566	1.57	1.266	1.265	1.192	1.005	1.13	1.123	1.891	endoplasmic reticulum	alpha-amino acid catabolic process; localization of cell; amino acid import; single-organism process; cellular metabolic process; establishment of localization; metabolic process; cellular amino acid metabolic process; tryptophan catabolic process; indolalkylamine metabolic process; organic cyclic compound catabolic process; single-organism transport; cellular amine metabolic process; aromatic am…	membrane; extracellular region part; apical plasma membrane; cytoplasmic vesicle; cell periphery; cytoplasm; vesicle; intrinsic component of membrane; intracellular part; cell; pigment granule; extracellular exosome; plasma membrane region; cell part; membrane part; intracellular; extracellular vesicle; membrane-bounded organelle; apical part of cell; intracellular organelle; intracellular vesicl…	substrate-specific transporter activity; monovalent inorganic cation transmembrane transporter activity; protein binding; antiporter activity; substrate-specific transmembrane transporter activity; ion antiporter activity; heterocyclic compound binding; organic cyclic compound binding; neutral amino acid transmembrane transporter activity; metal ion transmembrane transporter activity; catalytic a…	K06519	SLC3A2; solute carrier family 3, member 2	hsa04974 Protein digestion and absorption; hsa04150 mTOR signaling pathway;	IPR013780; IPR031984; IPR017853; IPR006047; IPR013781;	Glycosyl hydrolase, all-beta; Solute carrier family 3 member 2, N-terminal domain; Glycoside hydrolase superfamily; Glycosyl hydrolase, family 13, catalytic domain; Glycoside hydrolase, catalytic domain;	G	KOG0471	Alpha-amylase
P04217	Alpha-1B-glycoprotein OS=Homo sapiens OX=9606 GN=A1BG PE=1 SV=4	0.62	Down	3.5064e-05	A1BG	54.253	1.299	1.456	1.173	1.245	1.708	1.248	1.097	1.094	0.869	0.691	0.793	0.738	0.909	0.576	0.876	0.947	extracellular	leukocyte activation; neutrophil activation involved in immune response; immune effector process; single-organism process; platelet degranulation; response to stimulus; establishment of localization; myeloid cell activation involved in immune response; single-organism localization; granulocyte activation; cellular process; myeloid leukocyte activation; secretion; single-organism transport; leukoc…	secretory granule lumen; extracellular space; extracellular region part; cytoplasmic vesicle; cytoplasm; vesicle; cytoplasmic vesicle part; intracellular part; cell; ficolin-1-rich granule lumen; organelle part; ficolin-1-rich granule; membrane-enclosed lumen; extracellular exosome; vesicle lumen; intracellular organelle lumen; intracellular; cell part; secretory vesicle; extracellular vesicle; s…	protein binding; binding;				IPR003598; IPR007110; IPR013783; IPR003599;	Immunoglobulin subtype 2; Immunoglobulin-like domain; Immunoglobulin-like fold; Immunoglobulin subtype;
P21589	5'-nucleotidase OS=Homo sapiens OX=9606 GN=NT5E PE=1 SV=1	0.531	Down	0.000124225	NT5E	63.367	1.059	1.215	1.254	1.328	1.222	1.743	1.525	1.939	0.874	0.889	0.849	0.829	0.384	0.624	0.734	0.812	peroxisome	purine nucleoside metabolic process; pyrimidine nucleoside catabolic process; nucleoside metabolic process; pyridine nucleotide metabolic process; purine ribonucleoside monophosphate metabolic process; nucleotide metabolic process; AMP catabolic process; single-organism process; nucleoside biosynthetic process; purine ribonucleoside biosynthetic process; biosynthetic process; regulation of defens…	membrane; extracellular region part; cell periphery; vesicle; cytoplasm; anchored component of membrane; intrinsic component of membrane; intracellular part; cell; cytosol; extracellular region; plasma membrane; organelle; extracellular exosome; membrane part; intracellular; cell part; extracellular vesicle; cell surface; membrane-bounded organelle; extracellular organelle; cytoplasmic part;	nucleoside phosphate binding; phosphatase activity; nucleotidase activity; ion binding; hydrolase activity; nucleotide binding; heterocyclic compound binding; organic cyclic compound binding; 5'-nucleotidase activity; catalytic activity; phosphoric ester hydrolase activity; binding; hydrolase activity, acting on ester bonds; cation binding; metal ion binding; small molecule binding;	K19970	NT5E; 5'-nucleotidase [EC:3.1.3.5]	hsa00760 Nicotinate and nicotinamide metabolism; hsa00230 Purine metabolism; hsa00240 Pyrimidine metabolism; hsa01100 Metabolic pathways;	IPR029052; IPR004843; IPR008334;	Metallo-dependent phosphatase-like; Calcineurin-like phosphoesterase domain, ApaH type; 5'-Nucleotidase, C-terminal;	F	KOG4419	5' nucleotidase
P04004	Vitronectin OS=Homo sapiens OX=9606 GN=VTN PE=1 SV=1	0.652	Down	4.117e-05	VTN	54.305	1.252	1.359	1.007	1.102	1.427	1.251	1.513	1.267	1.155	0.8	0.788	0.783	0.917	0.695	0.786	0.713	extracellular	regulation of vesicle-mediated transport; cellular component biogenesis; regulation of biological quality; positive regulation of cell migration; gland development; positive regulation of cellular protein metabolic process; regulation of defense response; endoderm development; biological adhesion; negative regulation of peptidase activity; oligodendrocyte differentiation; macromolecular complex a…	membrane; extracellular space; extracellular region part; endoplasmic reticulum; cell periphery; membrane protein complex; vesicle; cytoplasm; macromolecular complex; intracellular part; cell; extracellular matrix component; organelle part; basement membrane; membrane-enclosed lumen; extracellular exosome; intracellular organelle lumen; membrane part; intracellular; cell part; extracellular vesic…	receptor binding; ion binding; macromolecular complex binding; cargo receptor activity; scavenger receptor activity; protein binding; integrin binding; heparin binding; sulfur compound binding; extracellular matrix binding; cell adhesion molecule binding; molecular transducer activity; carbohydrate derivative binding; polysaccharide binding; identical protein binding; receptor activity; binding; …	K06251	VTN; vitronectin	hsa04151 PI3K-Akt signaling pathway; hsa04610 Complement and coagulation cascades; hsa05205 Proteoglycans in cancer; hsa04510 Focal adhesion; hsa04512 ECM-receptor interaction;	IPR000585; IPR020436; IPR001212;	Hemopexin-like domain; Somatomedin B, chordata; Somatomedin B domain;	OW	KOG1565	Gelatinase A and related matrix metalloproteases
Q86UY5	Protein FAM83A OS=Homo sapiens OX=9606 GN=FAM83A PE=1 SV=1	1.723	Up	0.0063779	FAM83A	47.457					0.668	0.715	0.786	0.736					1.013	0.966	1.537	1.488	nucleus	regulation of cellular process; single organism signaling; cellular response to stimulus; cell surface receptor signaling pathway; single-organism process; transmembrane receptor protein tyrosine kinase signaling pathway; cell proliferation; epidermal growth factor receptor signaling pathway; signaling; response to stimulus; signal transduction; regulation of biological process; cell communicatio…	intracellular part; cell; cell part; intracellular; cytoplasm;	phosphatidylinositol 3-kinase binding; protein binding; phosphatidylinositol 3-kinase regulatory subunit binding; kinase binding; enzyme binding; binding; protein kinase binding;
P31323	cAMP-dependent protein kinase type II-beta regulatory subunit OS=Homo sapiens OX=9606 GN=PRKAR2B PE=1 SV=3	0.405	Down	6.0997e-09	PRKAR2B	46.302	1.248	1.286	1.731	1.747	1.533	1.465	1.935	1.454	0.518	0.561	0.769	0.666	0.565	0.535	0.639	0.763	cytoplasm	single organism signaling; cellular component biogenesis; blood coagulation; regulation of biological quality; positive regulation of cellular protein metabolic process; response to antipsychotic drug; cilium assembly; cellular lipid metabolic process; cellular metabolic process; neurological system process; cilium organization; behavior; regulation of protein serine/threonine kinase activity; me…	membrane; dendrite; extracellular region part; organelle membrane; cell periphery; membrane microdomain; vesicle; cytoplasm; neuronal cell body; macromolecular complex; intracellular part; cell; organelle part; dendritic spine; non-membrane-bounded organelle; cytoskeleton; mitochondrial envelope; extracellular exosome; microtubule organizing center; neuron spine; microtubule cytoskeleton; ciliary…	protein serine/threonine kinase inhibitor activity; protein kinase A binding; nucleoside phosphate binding; ubiquitin protein ligase binding; protein kinase binding; protein kinase inhibitor activity; protein binding; kinase regulator activity; enzyme inhibitor activity; molecular function regulator; heterocyclic compound binding; organic cyclic compound binding; ribonucleotide binding; binding; …	K04739	PRKAR; cAMP-dependent protein kinase regulator	hsa04910 Insulin signaling pathway;	IPR000595; IPR018490; IPR003117; IPR014710;	Cyclic nucleotide-binding domain; Cyclic nucleotide-binding-like; cAMP-dependent protein kinase regulatory subunit, dimerization-anchoring domain; RmlC-like jelly roll fold;	T	KOG1113	cAMP-dependent protein kinase types I and II, regulatory subunit
Q9NRL2	Bromodomain adjacent to zinc finger domain protein 1A OS=Homo sapiens OX=9606 GN=BAZ1A PE=1 SV=2	1.653	Up	0.0059036	BAZ1A	178.7					0.825	0.761	0.637	0.728					1.508	1.249	0.908	1.214	nucleus	regulation of cellular process; cellular component organization; chromatin remodeling; DNA replication; cellular aromatic compound metabolic process; DNA metabolic process; nucleic acid-templated transcription; regulation of macromolecule metabolic process; regulation of nucleobase-containing compound metabolic process; biosynthetic process; cellular metabolic process; organic substance metabolic…	intracellular organelle; ACF complex; intracellular organelle part; CHRAC; macromolecular complex; intracellular part; SWI/SNF superfamily-type complex; cell; organelle part; ISWI-type complex; intracellular membrane-bounded organelle; organelle; nucleus; intracellular; cell part; membrane-bounded organelle; protein complex; nuclear part;	transition metal ion binding; binding; ion binding; cation binding; metal ion binding; protein binding; zinc ion binding;	K11655			IPR001965; IPR001487; IPR028942; IPR018501; IPR013083; IPR013136; IPR011011; IPR019787; IPR028941;	Zinc finger, PHD-type; Bromodomain; WHIM1 domain; DDT domain; Zinc finger, RING/FYVE/PHD-type; WSTF/Acf1/Cbp146; Zinc finger, FYVE/PHD-type; Zinc finger, PHD-finger; WHIM2 domain;	B	KOG1245	Chromatin remodeling complex WSTF-ISWI, large subunit (contains heterochromatin localization, PHD and BROMO domains)
P11217	"""Glycogen phosphorylase, muscle form OS=Homo sapiens OX=9606 GN=PYGM PE=1 SV=6"""	0.473	Down	0.0055396	PYGM	97.091	1.046	1.151	2.283	1.798	2.425	1.196	1.081	0.562	0.414	0.526	0.823	0.601	0.94	1.059	0.358	0.742	cytoplasm	cellular carbohydrate catabolic process; glucan metabolic process; single-organism process; energy reserve metabolic process; cellular metabolic process; cellular polysaccharide metabolic process; organic substance metabolic process; glycogen catabolic process; metabolic process; generation of precursor metabolites and energy; cellular carbohydrate metabolic process; polysaccharide metabolic proc…	extracellular exosome; organelle; extracellular region part; cell part; intracellular; cytoplasm; vesicle; extracellular vesicle; intracellular part; cytosol; cell; membrane-bounded organelle; extracellular region; extracellular organelle; cytoplasmic part;	nucleoside phosphate binding; transferase activity, transferring hexosyl groups; ion binding; protein binding; nucleotide binding; cofactor binding; pyridoxal phosphate binding; heterocyclic compound binding; organic cyclic compound binding; catalytic activity; binding; phosphorylase activity; transferase activity, transferring glycosyl groups; anion binding; transferase activity; glycogen phosph…	K00688	PYG; glycogen phosphorylase [EC:2.4.1.1]	hsa01100 Metabolic pathways; hsa00500 Starch and sucrose metabolism; hsa04922 Glucagon signaling pathway; hsa04910 Insulin signaling pathway; hsa04931 Insulin resistance;			G	KOG2099	Glycogen phosphorylase
Q14CN2	Calcium-activated chloride channel regulator 4 OS=Homo sapiens OX=9606 GN=CLCA4 PE=1 SV=2	0.316	Down	0.00061607	CLCA4	101.28	1.633	1.714	1.94	1.167	1.414	2.606	1.56	1.501	0.491	0.331	0.871	0.559	0.192	0.203	1.083	0.541	plasma membrane	inorganic anion transmembrane transport; ion transmembrane transport; inorganic ion transmembrane transport; chloride transport; primary metabolic process; anion transmembrane transport; organic substance metabolic process; chloride transmembrane transport; establishment of localization; transport; anion transport; transmembrane transport; metabolic process; ion transport; proteolysis; macromolec…	membrane; extracellular region part; intrinsic component of plasma membrane; apical plasma membrane; cell periphery; vesicle; intrinsic component of membrane; integral component of plasma membrane; cell; extracellular region; integral component of membrane; plasma membrane; extracellular exosome; organelle; plasma membrane part; plasma membrane region; cell part; membrane part; extracellular vesi…	ion gated channel activity; metalloendopeptidase activity; peptidase activity; ion transmembrane transporter activity; ion binding; passive transmembrane transporter activity; intracellular chloride channel activity; anion channel activity; substrate-specific transporter activity; hydrolase activity; metallopeptidase activity; chloride channel activity; channel activity; inorganic anion transmemb…	K05030	CLCA3_4; calcium-activated chloride channel regulator 3/4	hsa04924 Renin secretion; hsa04972 Pancreatic secretion;	IPR002035;	von Willebrand factor, type A;
P31151	Protein S100-A7 OS=Homo sapiens OX=9606 GN=S100A7 PE=1 SV=4	4.122	Up	0.0020552	S100A7	11.471	0.204	0.199	0.213	1.2	0.214	0.212	0.438	0.334	0.45	0.544	3.285	1.773	0.697	0.658	3.266	1.751	cytoplasm	regulation of biological quality; positive regulation of cell migration; positive regulation of cellular protein metabolic process; leukocyte activation; defense response to other organism; response to biotic stimulus; epidermal cell differentiation; response to external stimulus; angiogenesis; regulation of localization; epidermis development; positive regulation of phosphorylation; positive reg…	secretory granule lumen; extracellular region part; endoplasmic reticulum; cytoplasmic vesicle; cell junction; vesicle; cytoplasm; cytoplasmic vesicle part; intracellular part; azurophil granule lumen; cell; organelle part; vacuolar lumen; extracellular exosome; membrane-enclosed lumen; vesicle lumen; focal adhesion; intracellular organelle lumen; intracellular; cell part; secretory vesicle; lyso…	RAGE receptor binding; transition metal ion binding; receptor binding; binding; ion binding; metal ion binding; cation binding; protein binding; calcium ion binding; zinc ion binding;	K21126	S100A7; protein S100-A7	hsa04657 IL-17 signaling pathway;	IPR034325; IPR002048; IPR011992; IPR013787;	S-100; EF-hand domain; EF-hand domain pair; S100/CaBP-9k-type, calcium binding, subdomain;
Q9Y2S2	Lambda-crystallin homolog OS=Homo sapiens OX=9606 GN=CRYL1 PE=1 SV=3	0.605	Down	0.000175645	CRYL1	35.419	1.14	1.046	1.274	1.552	1.098	1.497	1.474	1.603	0.778	0.565	0.849	1.111	0.573	0.829	0.815	0.941	extracellular	glucuronate catabolic process to xylulose 5-phosphate; monosaccharide catabolic process; single-organism process; cellular lipid metabolic process; biosynthetic process; cellular metabolic process; phosphate-containing compound metabolic process; uronic acid metabolic process; organic substance metabolic process; xylulose 5-phosphate metabolic process; metabolic process; carbohydrate derivative b…	extracellular exosome; organelle; extracellular region part; cell part; intracellular; cytoplasm; vesicle; extracellular vesicle; intracellular part; cytosol; cell; membrane-bounded organelle; extracellular region; extracellular organelle; cytoplasmic part;	nucleoside phosphate binding; ion binding; protein dimerization activity; NAD+ binding; protein binding; nucleotide binding; cofactor binding; oxidoreductase activity; oxidoreductase activity, acting on CH-OH group of donors; heterocyclic compound binding; organic cyclic compound binding; oxidoreductase activity, acting on the CH-OH group of donors, NAD or NADP as acceptor; identical protein bind…	K13247	CRYL1; L-gulonate 3-dehydrogenase [EC:1.1.1.45]	hsa00040 Pentose and glucuronate interconversions; hsa01100 Metabolic pathways;	IPR013328; IPR008927; IPR016040; IPR006176; IPR006108;	6-phosphogluconate dehydrogenase, domain 2; 6-phosphogluconate dehydrogenase C-terminal domain-like; NAD(P)-binding domain; 3-hydroxyacyl-CoA dehydrogenase, NAD binding; 3-hydroxyacyl-CoA dehydrogenase, C-terminal;	I	KOG2305	3-hydroxyacyl-CoA dehydrogenase
Q96AC1	Fermitin family homolog 2 OS=Homo sapiens OX=9606 GN=FERMT2 PE=1 SV=1	0.477	Down	9.7263e-05	FERMT2	77.86	1.008	1.126	1.814	1.447	2.097	1.282	1.197	1.594	0.591	0.608	1.028	0.724	0.954	0.521	0.406	0.689	nucleus	single organism signaling; cellular component biogenesis; regulation of biological quality; cell surface receptor signaling pathway; cellular developmental process; cell-cell junction organization; cellular response to transforming growth factor beta stimulus; cellular component morphogenesis; single-organism process; cellular response to growth factor stimulus; biological adhesion; substrate adh…	membrane; extrinsic component of membrane; cytoplasm; cytoplasmic region; macromolecular complex; supramolecular complex; cell; I band; cytoplasmic side of plasma membrane; organelle part; non-membrane-bounded organelle; nucleoplasm; plasma membrane region; focal adhesion; leading edge membrane; intracellular; lamellipodium; cell-substrate junction; membrane-bounded organelle; actomyosin; cell-su…	phosphatidylinositol phosphate binding; binding; phospholipid binding; phosphatidylinositol binding; ion binding; lipid binding; phosphatidylinositol-3,4,5-trisphosphate binding; anion binding; protein binding;	K17083			IPR019748; IPR019749; IPR011993; IPR001849; IPR014352;	FERM central domain; Band 4.1 domain; PH domain-like; Pleckstrin homology domain; FERM/acyl-CoA-binding protein, 3-helical bundle;	D	KOG3727	Mitogen inducible gene product (contains ERM and PH domains)
Q92598	Heat shock protein 105 kDa OS=Homo sapiens OX=9606 GN=HSPH1 PE=1 SV=1	1.648	Up	0.0130837	HSPH1	96.864	0.63	0.618	0.628	1.106	0.673	0.619	1.239	0.643	1.019	0.64	1.895	1.671	1.052	0.862	1.757	1.251	cytoplasm	regulation of leukocyte activation; regulation of stress-activated MAPK cascade; regulation of cell death; positive regulation of cellular protein metabolic process; positive regulation of biosynthetic process; regulation of hydrogen peroxide-mediated programmed cell death; 'de novo' protein folding; response to topologically incorrect protein; regulation of localization; regulation of establishm…	extracellular region part; microtubule; cytoplasmic vesicle; vesicle; cytoplasm; cytoplasmic vesicle part; supramolecular fiber; intracellular part; cell; supramolecular complex; organelle part; non-membrane-bounded organelle; membrane-enclosed lumen; extracellular exosome; cytoskeleton; vesicle lumen; nucleoplasm; intracellular organelle lumen; microtubule cytoskeleton; intracellular; cell part;…	ATP binding; nucleoside phosphate binding; nucleoside-triphosphatase regulator activity; nucleoside binding; ion binding; tubulin binding; protein binding; alpha-tubulin binding; nucleotide binding; molecular function regulator; organic cyclic compound binding; heterocyclic compound binding; ribonucleoside binding; carbohydrate derivative binding; cytoskeletal protein binding; enzyme regulator ac…	K09485	HSP110; heat shock protein 110kDa	hsa04141 Protein processing in endoplasmic reticulum;	IPR029048; IPR029047;	Heat shock protein 70kD, C-terminal domain; Heat shock protein 70kD, peptide-binding domain;	O	KOG0103	Molecular chaperones HSP105/HSP110/SSE1, HSP70 superfamily
P60981	Destrin OS=Homo sapiens OX=9606 GN=DSTN PE=1 SV=3	0.525	Down	0.00096305	DSTN	18.506	0.994	1.196	1.603	1.331	2.274	1.186	1.051	1.935	0.614	0.525	1.336	0.883	0.822	0.469	0.636	0.794	mitochondria	regulation of cellular process; cellular component organization; regulation of biological quality; regulation of actin cytoskeleton organization; positive regulation of protein complex disassembly; actin filament organization; single-organism process; regulation of actin filament length; protein complex disassembly; positive regulation of cellular component organization; actin cytoskeleton organi…	intracellular organelle; extracellular region part; cell cortex; intracellular non-membrane-bounded organelle; cell periphery; cytoskeletal part; cytoplasmic region; intracellular organelle part; cytoplasm; vesicle; cortical cytoskeleton; cortical actin cytoskeleton; intracellular part; cell; actin cytoskeleton; extracellular region; organelle part; non-membrane-bounded organelle; cytoskeleton; o…	actin filament binding; cytoskeletal protein binding; binding; macromolecular complex binding; actin binding; protein binding; protein complex binding;	K10363			IPR029006; IPR002108;	ADF-H/Gelsolin-like domain; Actin-depolymerising factor homology domain;	Z	KOG1735	Actin depolymerizing factor
P29536	Leiomodin-1 OS=Homo sapiens OX=9606 GN=LMOD1 PE=1 SV=3	0.337	Down	8.3808e-05	LMOD1	67.029	1.022	1.112	2.158	1.592	2.858	1.245	1.059	2.249	0.427	0.449	1.031	0.608	0.819	0.462	0.3	0.391	nucleus	regulation of cellular process; regulation of actin filament polymerization; cellular component organization; muscle system process; regulation of biological quality; positive regulation of protein polymerization; pointed-end actin filament capping; negative regulation of actin filament depolymerization; regulation of actin cytoskeleton organization; negative regulation of cellular component orga…	intracellular organelle; membrane; polymeric cytoskeletal fiber; intracellular non-membrane-bounded organelle; cytoskeletal part; myofibril; intracellular organelle part; cytoplasm; supramolecular fiber; intracellular part; cytosol; supramolecular complex; cell; actin cytoskeleton; organelle part; supramolecular polymer; non-membrane-bounded organelle; organelle; cytoskeleton; intracellular; cell…	actin binding; tropomyosin binding; protein binding; cytoskeletal protein binding; binding;				IPR003124; IPR032675;	WH2 domain; Leucine-rich repeat domain, L domain-like;	Z	KOG3735	Tropomodulin and leiomodulin
P12524	Protein L-Myc OS=Homo sapiens OX=9606 GN=MYCL PE=1 SV=2	0.243	Down	0.000181219	MYCL	40.326	0.973	1.215	2.931	1.736	3.692	1.304	0.937	2.02	0.219	0.276	0.91	0.523	0.92	0.29	0.136	0.323	nucleus	regulation of cellular process; single-multicellular organism process; regulation of macromolecule metabolic process; cellular developmental process; regulation of nucleobase-containing compound metabolic process; neurogenesis; single-organism process; regulation of epidermal cell differentiation; regulation of multicellular organismal process; regulation of RNA biosynthetic process; cell differe…	organelle; intracellular membrane-bounded organelle; intracellular organelle; nucleus; cell part; intracellular; intracellular part; membrane-bounded organelle; cell;	organic cyclic compound binding; heterocyclic compound binding; DNA binding; binding; protein dimerization activity; nucleic acid binding transcription factor activity; nucleic acid binding; protein binding; transcription factor activity, sequence-specific DNA binding;	K09110			IPR011598; IPR012682;	Myc-type, basic helix-loop-helix (bHLH) domain; Transcription regulator Myc, N-terminal;
Q9UKR3	Kallikrein-13 OS=Homo sapiens OX=9606 GN=KLK13 PE=2 SV=1	0.34	Down	8.4023e-05	KLK13	30.57	1.844	1.463	1.515	1.417	1.386	1.128	1.719	3.101	0.501	0.282	0.904	0.592	0.41	0.237	0.844	0.843	extracellular	single-multicellular organism process; keratinization; cellular developmental process; single-organism process; protein processing; organic substance metabolic process; epidermal cell differentiation; metabolic process; cell differentiation; epidermis development; proteolysis; macromolecule metabolic process; protein metabolic process; multicellular organism development; cellular process; develop…	intracellular vesicle; intracellular organelle; extracellular space; extracellular region part; cytoplasmic vesicle; cytoplasm; vesicle; endomembrane system; intracellular part; cell; extracellular region; organelle; extracellular exosome; intracellular; cell part; secretory vesicle; extracellular vesicle; secretory granule; membrane-bounded organelle; extracellular organelle; cytoplasmic part;	serine-type endopeptidase activity; endopeptidase activity; peptidase activity; catalytic activity; serine hydrolase activity; binding; serine-type peptidase activity; peptidase activity, acting on L-amino acid peptides; protein binding; hydrolase activity;	K09463			IPR009003; IPR001254;	Peptidase S1, PA clan; Serine proteases, trypsin domain;	E	KOG3627	Trypsin
Q99829	Copine-1 OS=Homo sapiens OX=9606 GN=CPNE1 PE=1 SV=1	1.553	Up	0.00165629	CPNE1	59.058	0.849	0.732	0.769	0.808	0.962	0.834	0.776	0.568	1.766	0.993	1.219	1.037	1.742	1.172	0.875	0.977	cyto_nucl	leukocyte activation; regulation of protein kinase B signaling; nucleic acid-templated transcription; cellular component morphogenesis; cellular lipid metabolic process; cellular metabolic process; lipid biosynthetic process; metabolic process; positive regulation of tumor necrosis factor-mediated signaling pathway; positive regulation of multicellular organismal process; regulation of I-kappaB k…	membrane; extracellular region part; cytoplasmic vesicle; organelle membrane; cell periphery; vesicle; cytoplasm; cytoplasmic vesicle part; intracellular part; cell; organelle part; lysosomal membrane; membrane-enclosed lumen; extracellular exosome; nucleoplasm; nuclear membrane; intracellular organelle lumen; intracellular; cell part; whole membrane; lysosome; secretory vesicle; extracellular ve…	calcium-dependent phospholipid binding; peptidase activity; protein dimerization activity; ion binding; hydrolase activity; protein binding; phosphatidylserine binding; endopeptidase activity; modified amino acid binding; identical protein binding; catalytic activity; protein homodimerization activity; binding; phospholipid binding; lipid binding; cation binding; metal ion binding; peptidase acti…				IPR000008; IPR010734; IPR002035;	C2 domain; Copine; von Willebrand factor, type A;	T	KOG1327	Copine
Q9NRN5	Olfactomedin-like protein 3 OS=Homo sapiens OX=9606 GN=OLFML3 PE=2 SV=1	0.47	Down	1.3335e-07	OLFML3	46.01	1.197	1.635	1.815	1.276	1.495	1.669	1.265	1.492	0.638	0.552	0.817	0.705	0.851	0.642	0.54	0.824	extracellular	developmental process; single-multicellular organism process; single-organism developmental process; single-organism process; multicellular organism development; multicellular organismal process; anatomical structure development;	organelle; extracellular region part; extracellular vesicle; vesicle; membrane-bounded organelle; extracellular region; extracellular organelle;					IPR003112;	Olfactomedin-like domain;	W	KOG3545	Olfactomedin and related extracellular matrix glycoproteins
I3L3R5	Coiled-coil domain-containing glutamate-rich protein 2 OS=Homo sapiens OX=9606 GN=CCER2 PE=2 SV=1	0.593	Down	0.0104405	CCER2	30.351	0.996	1.247	1.547	1.563	1.784	1.337	1.035	1.377	0.964	0.318	1.501	0.506	0.698	0.542	0.856	1.072	extracellular		extracellular region;
P08648	Integrin alpha-5 OS=Homo sapiens OX=9606 GN=ITGA5 PE=1 SV=2	0.562	Down	0.0064036	ITGA5	114.54	0.772	0.875	1.791	1.428	2.135	1.188	1.025	2.046	0.805	0.68	1.172	0.884	0.982	0.525	0.512	0.768	nucleus	single organism signaling; cellular component biogenesis; entry into host; regulation of cell death; positive regulation of cell migration; positive regulation of cellular protein metabolic process; cell surface receptor signaling pathway; neurological system process; behavior; endoderm development; biological adhesion; angiogenesis; positive regulation of multicellular organismal process; hetero…	membrane; protein complex involved in cell adhesion; endoplasmic reticulum; external side of plasma membrane; cytoplasmic vesicle; membrane protein complex; cell junction; cell periphery; vesicle; cytoplasm; macromolecular complex; intrinsic component of membrane; intracellular part; integral component of plasma membrane; cell; focal adhesion; membrane part; intracellular; cell part; adherens jun…	receptor binding; ion binding; cytokine receptor binding; macromolecular complex binding; growth factor receptor binding; vascular endothelial growth factor receptor binding; protein binding; integrin binding; virus receptor activity; cell adhesion molecule binding; platelet-derived growth factor receptor binding; molecular transducer activity; receptor activity; epidermal growth factor receptor …	K06484	ITGA5; integrin alpha 5	hsa05100 Bacterial invasion of epithelial cells; hsa04640 Hematopoietic cell lineage; hsa04810 Regulation of actin cytoskeleton; hsa04151 PI3K-Akt signaling pathway; hsa05133 Pertussis; hsa05205 Proteoglycans in cancer; hsa04510 Focal adhesion; hsa05206 MicroRNAs in cancer; hsa05414 Dilated cardiomyopathy; hsa04145 Phagosome; hsa04512 ECM-receptor interaction; hsa05412 Arrhythmogenic right ventri…	IPR032695; IPR013649;	Integrin domain; Integrin alpha-2;	W	KOG3637	Vitronectin receptor, alpha subunit
Q6UX04	Peptidyl-prolyl cis-trans isomerase CWC27 homolog OS=Homo sapiens OX=9606 GN=CWC27 PE=1 SV=1	1.748	Up	0.0041437	CWC27	53.846	0.79	0.672	0.573	0.831	0.921	0.594	0.731	0.579	0.821	2.202	0.809	1.017	1.928	0.914	1.087	1.17	nucleus	cellular aromatic compound metabolic process; cellular protein metabolic process; cellular metabolic process; organic substance metabolic process; protein folding; mRNA splicing, via spliceosome; metabolic process; RNA splicing, via transesterification reactions with bulged adenosine as nucleophile; heterocycle metabolic process; nucleobase-containing compound metabolic process; RNA splicing, via…	intracellular organelle; intracellular organelle part; macromolecular complex; nuclear lumen; intracellular part; spliceosomal complex; cell; organelle part; organelle; intracellular membrane-bounded organelle; membrane-enclosed lumen; catalytic complex; nucleoplasm; nucleus; intracellular organelle lumen; cell part; intracellular; catalytic step 2 spliceosome; ribonucleoprotein complex; intracel…	peptidyl-prolyl cis-trans isomerase activity; isomerase activity; catalytic activity; cis-trans isomerase activity;	K12737			IPR002130; IPR029000;	Cyclophilin-type peptidyl-prolyl cis-trans isomerase domain; Cyclophilin-like domain;	O	KOG0885	Peptidyl-prolyl cis-trans isomerase
Q15397	Pumilio homolog 3 OS=Homo sapiens OX=9606 GN=PUM3 PE=1 SV=3	1.516	Up	0.00169913	PUM3	73.584	0.753	0.771	0.751	0.793	0.773	0.889	0.741	0.872	1.073	1.943	0.973	0.901	1.163	1.165	1.237	1.161	nucleus	regulation of cellular process; regulation of gene expression; regulation of cellular biosynthetic process; regulation of primary metabolic process; posttranscriptional regulation of gene expression; regulation of macromolecule metabolic process; regulation of glycoprotein biosynthetic process; regulation of protein modification process; regulation of glycoprotein metabolic process; regulation of…	intracellular organelle; endoplasmic reticulum; intracellular non-membrane-bounded organelle; intracellular organelle part; cytoplasm; nuclear lumen; endomembrane system; intracellular part; nucleolus; cell; organelle part; non-membrane-bounded organelle; intracellular membrane-bounded organelle; organelle; membrane-enclosed lumen; nucleus; nucleoplasm; intracellular organelle lumen; intracellula…	organic cyclic compound binding; heterocyclic compound binding; DNA binding; mRNA binding; RNA binding; binding; nucleic acid binding; protein binding;	K14844			IPR012959; IPR011989; IPR016024; IPR033133;	CPL domain; Armadillo-like helical; Armadillo-type fold; Pumilio homology domain;	J	KOG2050	Puf family RNA-binding protein
Q9BX66	Sorbin and SH3 domain-containing protein 1 OS=Homo sapiens OX=9606 GN=SORBS1 PE=1 SV=3	0.395	Down	7.5361e-05	SORBS1	142.51	1.079	1.123	2.041	1.502	2.549	1.316	1.133	2.015	0.516	0.477	1.057	0.724	0.827	0.502	0.359	0.578	nucleus	cellular component biogenesis; single organism signaling; regulation of polysaccharide biosynthetic process; cell surface receptor signaling pathway; positive regulation of biosynthetic process; contractile actin filament bundle assembly; regulation of lipid metabolic process; biological adhesion; regulation of plasma membrane organization; actin cytoskeleton organization; regulation of localizat…	membrane; cell periphery; membrane microdomain; cell junction; cytoplasm; intracellular part; cell-cell adherens junction; cell; cell-cell junction; organelle part; actin filament bundle; non-membrane-bounded organelle; membrane-enclosed lumen; cytoskeleton; microtubule organizing center; intracellular organelle lumen; focal adhesion; microtubule cytoskeleton; membrane part; intracellular; cell p…	SH3/SH2 adaptor activity; protein binding, bridging; cytoskeletal protein binding; signaling adaptor activity; receptor binding; binding; macromolecular complex binding; actin binding; protein binding; binding, bridging; protein complex binding; insulin receptor binding;	K06086	SORBS1; sorbin and SH3 domain containing 1	hsa03320 PPAR signaling pathway; hsa04520 Adherens junction; hsa04910 Insulin signaling pathway;	IPR011511; IPR001452; IPR003127;	Variant SH3 domain; SH3 domain; SoHo domain;	T	KOG4225	Sorbin and SH3 domain-containing protein
Q13951	Core-binding factor subunit beta OS=Homo sapiens OX=9606 GN=CBFB PE=1 SV=2	1.626	Up	6.994e-07	CBFB	21.508	0.806	0.829	0.693	0.866	0.704	0.83	0.767	0.667	1.55	1.132	1.162	1.18	1.48	1.052	1.13	1.332	nucleus	osteoblast differentiation; developmental maturation; leukocyte activation; nucleic acid-templated transcription; cellular developmental process; positive regulation of biosynthetic process; single-organism process; biosynthetic process; cellular metabolic process; regulation of RNA biosynthetic process; metabolic process; positive regulation of metabolic process; positive regulation of nitrogen …	organelle; intracellular membrane-bounded organelle; intracellular organelle; membrane; nucleus; cell part; intracellular; intracellular part; membrane-bounded organelle; cell;	organic cyclic compound binding; heterocyclic compound binding; DNA binding; binding; nucleic acid binding transcription factor activity; nucleic acid binding; transcription factor activity, transcription factor binding; transcription coactivator activity; protein binding; transcription cofactor activity; transcription factor activity, protein binding; transcription factor activity, sequence-spec…						K	KOG4785	Transcription factor CBF, beta subunit
P02760	Protein AMBP OS=Homo sapiens OX=9606 GN=AMBP PE=1 SV=1	0.475	Down	3.2136e-10	AMBP	38.999	1.346	1.629	1.417	1.107	1.481	1.623	1.443	1.594	0.759	0.707	0.72	0.64	0.693	0.662	0.71	0.635	extracellular	regulation of stress-activated MAPK cascade; negative regulation of signal transduction; reproductive process; regulation of signaling; single-organism process; multi-organism cellular process; cellular metabolic process; negative regulation of protein modification process; establishment of localization; biological adhesion; negative regulation of peptidase activity; metabolic process; regulation…	intracellular organelle; membrane; extracellular space; extracellular region part; cell periphery; vesicle; intracellular part; cell; extracellular region; plasma membrane; intracellular membrane-bounded organelle; organelle; extracellular exosome; blood microparticle; intracellular; cell part; extracellular vesicle; cell surface; membrane-bounded organelle; extracellular organelle;	ion channel inhibitor activity; immunoglobulin binding; protein dimerization activity; macromolecular complex binding; peptidase regulator activity; calcium oxalate binding; ion channel regulator activity; protein binding; calcium channel regulator activity; enzyme inhibitor activity; molecular function regulator; endopeptidase inhibitor activity; channel inhibitor activity; heterocyclic compound…				IPR000566; IPR012674; IPR011038; IPR002223;	Lipocalin/cytosolic fatty-acid binding domain; Calycin; Calycin-like; Pancreatic trypsin inhibitor Kunitz domain;	O	KOG4295	Serine proteinase inhibitor (KU family)
Q9Y2K7	Lysine-specific demethylase 2A OS=Homo sapiens OX=9606 GN=KDM2A PE=1 SV=3	1.909	Up	0.028402	KDM2A	132.79					0.841	0.741	0.365	0.66					1.088	1.655	0.87	1.364	cyto_nucl	nucleic acid-templated transcription; histone demethylation; single-organism process; biosynthetic process; cellular metabolic process; protein dealkylation; regulation of RNA biosynthetic process; metabolic process; histone H3-K36 demethylation; protein demethylation; protein metabolic process; macromolecule metabolic process; cellular response to stimulus; regulation of gene expression; heteroc…	membrane-enclosed lumen; organelle; intracellular membrane-bounded organelle; intracellular organelle; nucleoplasm; nucleus; intracellular organelle lumen; cell part; intracellular; intracellular organelle part; nuclear lumen; intracellular part; membrane-bounded organelle; cell; organelle part; organelle lumen; nuclear part;	DNA binding; ion binding; oxidoreductase activity, acting on paired donors, with incorporation or reduction of molecular oxygen; protein binding; oxidoreductase activity, acting on paired donors, with incorporation or reduction of molecular oxygen, 2-oxoglutarate as one donor, and incorporation of one atom each of oxygen into both donors; zinc ion binding; demethylase activity; oxidoreductase act…	K10276			IPR001810; IPR003347; IPR001965; IPR032675; IPR013083; IPR011011; IPR002857; IPR019787;	F-box domain; JmjC domain; Zinc finger, PHD-type; Leucine-rich repeat domain, L domain-like; Zinc finger, RING/FYVE/PHD-type; Zinc finger, FYVE/PHD-type; Zinc finger, CXXC-type; Zinc finger, PHD-finger;	B	KOG1633	F-box protein JEMMA and related proteins with JmjC, PHD, F-box and LRR domains
Q9Y6A9	Signal peptidase complex subunit 1 OS=Homo sapiens OX=9606 GN=SPCS1 PE=1 SV=4	1.671	Up	0.00105759	SPCS1	11.805	0.969	1.02	0.807	0.752	0.658	0.582	0.696	0.48	1.347	1.302	0.816	1.074	1.861	1.057	1.429	1.081	plasma membrane	intracellular transport; establishment of protein localization to organelle; peptide metabolic process; signal peptide processing; cellular protein metabolic process; protein processing; cellular metabolic process; protein transport; establishment of localization; organic substance metabolic process; protein targeting; metabolic process; establishment of localization in cell; protein localization…	membrane; intracellular organelle; nuclear outer membrane-endoplasmic reticulum membrane network; endoplasmic reticulum; organelle membrane; membrane protein complex; intracellular organelle part; cytoplasm; intrinsic component of membrane; macromolecular complex; endomembrane system; intracellular part; cell; integral component of membrane; organelle part; organelle; intracellular membrane-bound…	protein binding; peptidase activity; hydrolase activity; catalytic activity; binding;	K12946	SPCS1; signal peptidase complex subunit 1 [EC:3.4.-.-]	hsa03060 Protein export;			U	KOG4112	Signal peptidase subunit
P54289	Voltage-dependent calcium channel subunit alpha-2/delta-1 OS=Homo sapiens OX=9606 GN=CACNA2D1 PE=1 SV=3	0.659	Down	5.9969e-05	CACNA2D1	124.57	1.133	1.121	1.316	1.391	1.611	1.177	1.463	1.144	0.746	0.872	0.855	1.042	1.065	0.69	0.727	0.832	plasma membrane	single organism signaling; regulation of biological quality; positive regulation of calcium ion transmembrane transport; cardiac conduction; regulation of action potential; regulation of calcium ion transmembrane transporter activity; regulation of localization; positive regulation of molecular function; calcium ion transport into cytosol; metal ion homeostasis; positive regulation of ion transme…	membrane; extracellular region part; endoplasmic reticulum; cell periphery; vesicle; cytoplasm; macromolecular complex; intrinsic component of membrane; intracellular part; cell; sarcoplasm; T-tubule; extracellular exosome; membrane part; intracellular; cell part; extracellular vesicle; ion channel complex; transporter complex; membrane-bounded organelle; voltage-gated calcium channel complex; in…	voltage-gated calcium channel activity; ion transmembrane transporter activity; ion binding; passive transmembrane transporter activity; substrate-specific transporter activity; channel activity; substrate-specific transmembrane transporter activity; voltage-gated ion channel activity; metal ion transmembrane transporter activity; divalent inorganic cation transmembrane transporter activity; subs…	K04858	CACNA2D1; voltage-dependent calcium channel alpha-2/delta-1	hsa04260 Cardiac muscle contraction; hsa04921 Oxytocin signaling pathway; hsa04010 MAPK signaling pathway; hsa04261 Adrenergic signaling in cardiomyocytes; hsa05414 Dilated cardiomyopathy; hsa05412 Arrhythmogenic right ventricular cardiomyopathy (ARVC); hsa05410 Hypertrophic cardiomyopathy (HCM);	IPR013680; IPR013608; IPR002035;	Voltage-dependent calcium channel, alpha-2/delta subunit, conserved region; VWA N-terminal; von Willebrand factor, type A;	PT	KOG2353	L-type voltage-dependent Ca2+ channel, alpha2/delta subunit
Q9H492	Microtubule-associated proteins 1A/1B light chain 3A OS=Homo sapiens OX=9606 GN=MAP1LC3A PE=1 SV=2	0.612	Down	0.046519	MAP1LC3A	14.272	1.41	1.781	0.848	1.201					1.089	0.696	0.715	0.706					nucleus	cellular component biogenesis; autophagosome organization; mitophagy; single-organism process; organelle disassembly; autophagy; cellular metabolic process; response to external stimulus; metabolic process; cell communication; cellular component assembly; mitochondrion organization; response to oxidative stress; response to isoquinoline alkaloid; response to endogenous stimulus; cellular response…	membrane; microtubule; organelle membrane; cytoplasmic vesicle; cytoplasm; vesicle; autolysosome; intracellular part; supramolecular fiber; cell; supramolecular complex; organelle part; autophagosome; non-membrane-bounded organelle; cytoskeleton; microtubule cytoskeleton; intracellular; cell part; whole membrane; lysosome; endosome; secondary lysosome; membrane-bounded organelle; autophagosome me…	ubiquitin protein ligase binding; binding; phospholipid binding; ion binding; lipid binding; protein binding; anion binding; phosphatidylethanolamine binding; ubiquitin-like protein ligase binding; enzyme binding;	K10435			IPR029071;	Ubiquitin-related domain;	Z	KOG1654	Microtubule-associated anchor protein involved in autophagy and membrane trafficking
Q92688	Acidic leucine-rich nuclear phosphoprotein 32 family member B OS=Homo sapiens OX=9606 GN=ANP32B PE=1 SV=1	1.808	Up	0.00130134	ANP32B	28.787	0.668	0.672	0.607	0.603	0.679	0.773	0.802	0.778	0.956	2.285	0.805	1.103	1.191	1.345	1.237	1.168	cytoplasm	cellular component biogenesis; negative regulation of developmental process; regulation of cell death; positive regulation of cellular protein metabolic process; brain development; single-organism process; nucleosome assembly; positive regulation of metabolic process; cellular component assembly; macromolecular complex assembly; regulation of localization; positive regulation of molecular functio…	intracellular organelle; extracellular region part; cytoplasm; vesicle; intracellular part; cell; extracellular region; organelle; extracellular exosome; intracellular membrane-bounded organelle; nucleus; intracellular; cell part; extracellular vesicle; membrane-bounded organelle; extracellular organelle;	histone binding; protein binding; RNA polymerase binding; enzyme binding; binding;	K18647			IPR003603; IPR032675;	U2A'/phosphoprotein 32 family A, C-terminal; Leucine-rich repeat domain, L domain-like;	DR	KOG2739	Leucine-rich acidic nuclear protein
P35237	Serpin B6 OS=Homo sapiens OX=9606 GN=SERPINB6 PE=1 SV=3	0.648	Down	1.71736e-05	SERPINB6	42.621	1.23	1.149	1.29	1.124	1.391	1.319	1.232	1.451	0.639	0.939	0.96	0.872	0.655	0.727	0.984	0.823	cytoplasm	leukocyte activation; single-organism process; neurological system process; establishment of localization; negative regulation of peptidase activity; myeloid leukocyte activation; single-organism transport; secretion; regulation of endopeptidase activity; cellular response to stimulus; leukocyte mediated immunity; sensory perception; response to osmotic stress; cellular response to abiotic stimul…	membrane; extracellular space; extracellular region part; organelle membrane; cytoplasmic vesicle; cell periphery; cytoplasm; vesicle; cytoplasmic vesicle part; macromolecular complex; intracellular part; cell; organelle part; tertiary granule membrane; extracellular exosome; intracellular; cell part; whole membrane; secretory vesicle; extracellular vesicle; secretory granule; membrane-bounded or…	protease binding; serine-type endopeptidase inhibitor activity; enzyme regulator activity; binding; peptidase inhibitor activity; peptidase regulator activity; endopeptidase regulator activity; protein binding; enzyme inhibitor activity; molecular function regulator; endopeptidase inhibitor activity; enzyme binding;	K13963	SERPINB; serpin B	hsa05146 Amoebiasis;	IPR023796;	Serpin domain;	V	KOG2392	Serpin
P32322	"""Pyrroline-5-carboxylate reductase 1, mitochondrial OS=Homo sapiens OX=9606 GN=PYCR1 PE=1 SV=2"""	2.353	Up	0.040901	PYCR1	33.36					0.478	0.736	0.481	0.467					1.024	2.271	0.604	1.188	mitochondria	regulation of biological quality; regulation of cell death; organic acid biosynthetic process; single-organism process; biosynthetic process; cellular metabolic process; glutamine family amino acid biosynthetic process; metabolic process; cellular amino acid metabolic process; alpha-amino acid biosynthetic process; proline metabolic process; response to oxidative stress; cellular response to oxid…	mitochondrial matrix; intracellular organelle; mitochondrial part; cytoplasm; intracellular organelle part; intracellular part; cell; mitochondrion; organelle part; membrane-enclosed lumen; organelle; intracellular membrane-bounded organelle; intracellular organelle lumen; cell part; intracellular; membrane-bounded organelle; cytoplasmic part; organelle lumen;	oxidoreductase activity, acting on the CH-NH group of donors; oxidoreductase activity, acting on the CH-NH group of donors, NAD or NADP as acceptor; identical protein binding; catalytic activity; pyrroline-5-carboxylate reductase activity; binding; protein binding; oxidoreductase activity;	K00286	proC; pyrroline-5-carboxylate reductase [EC:1.5.1.2]	hsa01100 Metabolic pathways; hsa01230 Biosynthesis of amino acids; hsa00330 Arginine and proline metabolism;	IPR028939; IPR008927; IPR016040; IPR029036;	Pyrroline-5-carboxylate reductase, catalytic, N-terminal; 6-phosphogluconate dehydrogenase C-terminal domain-like; NAD(P)-binding domain; Pyrroline-5-carboxylate reductase, dimerisation domain;	E	KOG3124	Pyrroline-5-carboxylate reductase
O43143	Pre-mRNA-splicing factor ATP-dependent RNA helicase DHX15 OS=Homo sapiens OX=9606 GN=DHX15 PE=1 SV=2	1.507	Up	0.0021559	DHX15	90.932	0.793	0.754	0.729	0.809	0.775	0.834	0.856	0.772	1.026	1.848	0.917	0.963	1.321	1.273	1.05	1.132	nucleus	cellular aromatic compound metabolic process; response to alkaloid; response to stimulus; cellular metabolic process; organic substance metabolic process; mRNA splicing, via spliceosome; metabolic process; RNA splicing, via transesterification reactions with bulged adenosine as nucleophile; heterocycle metabolic process; nucleobase-containing compound metabolic process; RNA splicing, via transest…	intracellular organelle; intracellular non-membrane-bounded organelle; intracellular organelle part; cytoplasm; macromolecular complex; nuclear lumen; intracellular part; spliceosomal complex; nucleolus; nuclear body; cell; organelle part; non-membrane-bounded organelle; organelle; intracellular membrane-bounded organelle; membrane-enclosed lumen; nucleoplasm; nucleus; intracellular organelle lum…	nucleoside phosphate binding; ATP-dependent helicase activity; hydrolase activity, acting on acid anhydrides; protein binding; hydrolase activity; ATPase activity; heterocyclic compound binding; organic cyclic compound binding; pyrophosphatase activity; catalytic activity; ribonucleotide binding; binding; purine ribonucleoside binding; ATP-dependent RNA helicase activity; anion binding; adenyl ri…	K12820	DHX15; pre-mRNA-splicing factor ATP-dependent RNA helicase DHX15/PRP43 [EC:3.6.4.13]	hsa03040 Spliceosome;	IPR007502; IPR011545; IPR011709; IPR027417; IPR014001; IPR001650;	Helicase-associated domain; DEAD/DEAH box helicase domain; Domain of unknown function DUF1605; P-loop containing nucleoside triphosphate hydrolase; Helicase superfamily 1/2, ATP-binding domain; Helicase, C-terminal;	A	KOG0925	mRNA splicing factor ATP-dependent RNA helicase
Q6NYC1	Bifunctional arginine demethylase and lysyl-hydroxylase JMJD6 OS=Homo sapiens OX=9606 GN=JMJD6 PE=1 SV=1	3.681	Up	0.00032316	JMJD6	46.461					0.486	0.273	0.376	0.425					1.44	1.861	1.002	1.439	nucleus	single organism signaling; regulation of biological quality; peptidyl-lysine hydroxylation; leukocyte activation; cell surface receptor signaling pathway; nucleic acid-templated transcription; myeloid cell homeostasis; respiratory tube development; histone demethylation; cellular metabolic process; T cell activation; angiogenesis; metabolic process; heart development; macrophage activation; myelo…	membrane; intracellular organelle; intracellular non-membrane-bounded organelle; cell periphery; cytoplasm; intracellular organelle part; macromolecular complex; nuclear lumen; intracellular part; nucleolus; cytosol; cell; organelle part; plasma membrane; non-membrane-bounded organelle; organelle; intracellular membrane-bounded organelle; membrane-enclosed lumen; nucleoplasm; nucleus; intracellul…	RNA binding; iron ion binding; peptidyl-lysine 5-dioxygenase activity; protein dimerization activity; ion binding; oxidoreductase activity, acting on paired donors, with incorporation or reduction of molecular oxygen; histone demethylase activity (H3-R2 specific); protein binding; oxidoreductase activity, acting on paired donors, with incorporation or reduction of molecular oxygen, 2-oxoglutarate…	K11323			IPR003347;	JmjC domain;	BT	KOG2130	Phosphatidylserine-specific receptor PtdSerR, contains JmjC domain
P07358	Complement component C8 beta chain OS=Homo sapiens OX=9606 GN=C8B PE=1 SV=3	0.643	Down	2.6331e-07	C8B	67.046	1.326	1.307	1.185	1.117	1.506	1.269	1.367	1.302	1.029	0.718	0.872	0.807	0.881	0.744	0.778	0.842	extracellular	regulation of complement activation; immunoglobulin mediated immune response; cytolysis; regulation of protein activation cascade; immune effector process; regulation of macromolecule metabolic process; regulation of humoral immune response; regulation of acute inflammatory response; humoral immune response; regulation of response to stress; response to stimulus; regulation of defense response; i…	membrane; intrinsic component of plasma membrane; extracellular space; extracellular region part; membrane protein complex; cell periphery; pore complex; plasma membrane protein complex; vesicle; macromolecular complex; intrinsic component of membrane; integral component of plasma membrane; cell; integral component of membrane; extracellular region; plasma membrane; organelle; extracellular exoso…	protein binding; binding; protein complex binding; macromolecular complex binding;	K03998	C8B; complement component 8 subunit beta	hsa05322 Systemic lupus erythematosus; hsa04610 Complement and coagulation cascades; hsa05146 Amoebiasis; hsa05020 Prion diseases;	IPR020864;	Membrane attack complex component/perforin (MACPF) domain;
Q13228	Methanethiol oxidase OS=Homo sapiens OX=9606 GN=SELENBP1 PE=1 SV=2	0.525	Down	2.5229e-09	SELENBP1	52.39	1.286	1.315	1.44	1.415	1.624	1.427	1.311	1.389	0.736	0.604	0.694	0.824	0.893	0.782	0.682	0.674	cytoplasm	establishment of protein localization; transport; organic substance transport; localization; macromolecule localization; protein localization; protein transport; establishment of localization;	membrane; extracellular space; extracellular region part; cytoplasm; vesicle; intracellular part; cell; organelle part; non-membrane-bounded organelle; membrane-enclosed lumen; extracellular exosome; intracellular organelle lumen; intracellular; cell part; extracellular vesicle; membrane-bounded organelle; organelle lumen; intracellular organelle; intracellular non-membrane-bounded organelle; int…	protein binding; selenium binding; binding;	K17285			IPR015943;	WD40/YVTN repeat-like-containing domain;	P	KOG0918	Selenium-binding protein
Q13206	Probable ATP-dependent RNA helicase DDX10 OS=Homo sapiens OX=9606 GN=DDX10 PE=1 SV=2	1.631	Up	0.0129752	DDX10	100.89	0.645	0.681	0.88	0.821					1.372	1.561	0.946	1.059					nucleus	cellular aromatic compound metabolic process; organic cyclic compound metabolic process; nitrogen compound metabolic process; primary metabolic process; cellular metabolic process; organic substance metabolic process; RNA metabolic process; metabolic process; nucleic acid metabolic process; heterocycle metabolic process; nucleobase-containing compound metabolic process; cellular macromolecule met…		nucleoside phosphate binding; ATP-dependent helicase activity; hydrolase activity, acting on acid anhydrides; hydrolase activity; ATPase activity; heterocyclic compound binding; organic cyclic compound binding; pyrophosphatase activity; catalytic activity; ribonucleotide binding; binding; purine ribonucleoside binding; ATP-dependent RNA helicase activity; anion binding; adenyl ribonucleotide bind…	K14776			IPR014014; IPR011545; IPR025313; IPR014001; IPR027417; IPR001650;	RNA helicase, DEAD-box type, Q motif; DEAD/DEAH box helicase domain; Domain of unknown function DUF4217; Helicase superfamily 1/2, ATP-binding domain; P-loop containing nucleoside triphosphate hydrolase; Helicase, C-terminal;	A	KOG0343	RNA Helicase
P55210	Caspase-7 OS=Homo sapiens OX=9606 GN=CASP7 PE=1 SV=1	1.793	Up	9.6186e-05	CASP7	34.276	0.673	0.828	0.473	0.77	0.711	0.782	0.702	0.784	1.081	1.865	0.812	1.375	1.366	1.128	1.398	1.235	cytoplasm	regulation of cellular process; regulation of cell death; positive regulation of cellular protein metabolic process; positive regulation of cysteine-type endopeptidase activity; regulation of macromolecule metabolic process; regulation of programmed cell death; positive regulation of apoptotic process; single-organism process; organic substance metabolic process; metabolic process; positive regul…	intracellular organelle; cytoplasm; intracellular organelle part; nuclear lumen; intracellular part; cytosol; cell; organelle part; organelle; intracellular membrane-bounded organelle; membrane-enclosed lumen; nucleoplasm; nucleus; intracellular organelle lumen; cell part; intracellular; membrane-bounded organelle; cytoplasmic part; organelle lumen; nuclear part;	endopeptidase activity; cysteine-type endopeptidase activity involved in apoptotic process; peptidase activity; catalytic activity; binding; peptidase activity, acting on L-amino acid peptides; hydrolase activity; cysteine-type peptidase activity; protein binding; cysteine-type endopeptidase activity; cysteine-type endopeptidase activity involved in execution phase of apoptosis;	K04397	CASP7; caspase 7 [EC:3.4.22.60]	hsa05010 Alzheimer's disease; hsa05134 Legionellosis; hsa05133 Pertussis; hsa04210 Apoptosis; hsa04932 Non-alcoholic fatty liver disease (NAFLD); hsa04215 Apoptosis - multiple species; hsa04668 TNF signaling pathway;	IPR029030; IPR001309; IPR015917; IPR002138;	Caspase-like domain; Peptidase C14, p20 domain; Peptidase C14A, caspase catalytic domain; Peptidase C14, caspase non-catalytic subunit p10;	D	KOG3573	Caspase, apoptotic cysteine protease
P50238	Cysteine-rich protein 1 OS=Homo sapiens OX=9606 GN=CRIP1 PE=1 SV=3	0.529	Down	0.000197184	CRIP1	8.5328	1.253	1.425	1.295	1.63	1.503	1.152	1.586	1.555	0.838	0.606	0.875	0.769	1.185	0.65	0.65	0.456	nucleus	single organism signaling; gland development; reproductive process; cellular response to UV; single-organism process; signal transduction; heart development; cell communication; single organism reproductive process; apoptotic process; response to radiation; response to inorganic substance; connective tissue development; cellular response to chemical stimulus; developmental process; cellular respo…	intracellular part; cell; cell part; intracellular; cytoplasm;	DNA binding; double-stranded DNA binding; ion binding; sequence-specific double-stranded DNA binding; amide binding; zinc ion binding; sequence-specific DNA binding; heterocyclic compound binding; organic cyclic compound binding; transition metal ion binding; peptide binding; AT DNA binding; binding; nucleic acid binding; cation binding; metal ion binding; DNA binding, bending;				IPR001781;	Zinc finger, LIM-type;	TZ	KOG1700	Regulatory protein MLP and related LIM proteins
P04839	Cytochrome b-245 heavy chain OS=Homo sapiens OX=9606 GN=CYBB PE=1 SV=2	1.671	Up	0.00048377	CYBB	65.335	0.855	0.873	0.629	0.808	1.018	0.578	0.536	0.665	1.257	1.343	0.874	1.385	1.822	1.069	0.98	1.231	plasma membrane	single organism signaling; superoxide metabolic process; regulation of biological quality; leukocyte activation; cell surface receptor signaling pathway; regulation of tumor necrosis factor production; positive regulation of cytokine biosynthetic process; positive regulation of biosynthetic process; positive regulation of tumor necrosis factor production; cellular metabolic process; response to m…	membrane; dendrite; organelle membrane; cytoplasm; cytoplasmic vesicle part; neuronal cell body; macromolecular complex; integral component of plasma membrane; cell; organelle part; intracellular; secretory vesicle; neuron projection; NADPH oxidase complex; membrane-bounded organelle; neuron part; endoplasmic reticulum membrane; cell projection; intrinsic component of plasma membrane; rough endop…	nucleoside phosphate binding; flavin adenine dinucleotide binding; passive transmembrane transporter activity; protein dimerization activity; substrate-specific transporter activity; protein binding; channel activity; superoxide-generating NADPH oxidase activity; substrate-specific transmembrane transporter activity; heterocyclic compound binding; organic cyclic compound binding; heme binding; ca…	K08008	NOX; NADPH oxidase	hsa04670 Leukocyte transendothelial migration; hsa04380 Osteoclast differentiation; hsa05418 Fluid shear stress and atherosclerosis; hsa04066 HIF-1 signaling pathway; hsa04933 AGE-RAGE signaling pathway in diabetic complications; hsa04145 Phagosome; hsa04621 NOD-like receptor signaling pathway;	IPR017927; IPR013121; IPR013112; IPR017938; IPR013130;	Ferredoxin reductase-type FAD-binding domain; Ferric reductase, NAD binding domain; FAD-binding 8; Riboflavin synthase-like beta-barrel; Ferric reductase transmembrane component-like domain;	PQ	KOG0039	Ferric reductase, NADH/NADPH oxidase and related proteins
Q96AY3	Peptidyl-prolyl cis-trans isomerase FKBP10 OS=Homo sapiens OX=9606 GN=FKBP10 PE=1 SV=1	2.103	Up	1.4392e-07	FKBP10	64.244	0.556	0.701	0.553	0.716	0.75	0.581	0.634	0.611	1.665	1.299	1.144	1.373	1.61	1.171	0.943	1.526	extracellular	chaperone-mediated protein folding; cellular protein metabolic process; primary metabolic process; peptidyl-proline modification; protein peptidyl-prolyl isomerization; cellular metabolic process; organic substance metabolic process; protein folding; peptidyl-amino acid modification; metabolic process; cellular macromolecule metabolic process; cellular protein modification process; protein metabo…	endoplasmic reticulum lumen; intracellular organelle; endoplasmic reticulum; cytoplasm; intracellular organelle part; endomembrane system; intracellular part; cell; organelle part; organelle; intracellular membrane-bounded organelle; membrane-enclosed lumen; intracellular organelle lumen; endoplasmic reticulum part; cell part; intracellular; membrane-bounded organelle; cytoplasmic part; organelle…	organic cyclic compound binding; heterocyclic compound binding; peptidyl-prolyl cis-trans isomerase activity; isomerase activity; catalytic activity; binding; ion binding; cation binding; metal ion binding; drug binding; calcium ion binding; FK506 binding; macrolide binding; cis-trans isomerase activity;	K09575			IPR002048; IPR011992; IPR001179;	EF-hand domain; EF-hand domain pair; FKBP-type peptidyl-prolyl cis-trans isomerase domain;	O	KOG0549	FKBP-type peptidyl-prolyl cis-trans isomerase
Q14566	DNA replication licensing factor MCM6 OS=Homo sapiens OX=9606 GN=MCM6 PE=1 SV=1	2.243	Up	6.1697e-05	MCM6	92.888	0.54	0.575	0.607	0.642	0.504	0.563	0.545	0.6	1.229	1.945	1.078	1.071	1.325	1.753	0.875	0.986	nucleus	cellular component organization; DNA replication; DNA unwinding involved in DNA replication; cellular aromatic compound metabolic process; DNA metabolic process; DNA geometric change; single-organism process; biosynthetic process; mitotic cell cycle process; cellular metabolic process; organic substance metabolic process; metabolic process; DNA replication initiation; heterocycle metabolic proces…	intracellular organelle; nuclear chromosome, telomeric region; chromosome, telomeric region; intracellular non-membrane-bounded organelle; intracellular organelle part; macromolecular complex; nuclear lumen; intracellular part; MCM complex; cell; organelle part; chromosomal part; non-membrane-bounded organelle; membrane-enclosed lumen; intracellular membrane-bounded organelle; chromosomal region;…	nucleoside phosphate binding; single-stranded DNA binding; hydrolase activity, acting on acid anhydrides; protein binding; hydrolase activity; heterocyclic compound binding; organic cyclic compound binding; identical protein binding; pyrophosphatase activity; catalytic activity; ribonucleotide binding; binding; purine ribonucleoside binding; anion binding; adenyl ribonucleotide binding; adenyl nu…	K02542	MCM6; DNA replication licensing factor MCM6 [EC:3.6.4.12]	hsa04110 Cell cycle; hsa03030 DNA replication;	IPR012340; IPR001208; IPR004039; IPR027417; IPR033762; IPR027925;	Nucleic acid-binding, OB-fold; MCM domain; Rubredoxin-type fold; P-loop containing nucleoside triphosphate hydrolase; MCM OB domain; MCM N-terminal domain;	L	KOG0480	DNA replication licensing factor, MCM6 component
P21246	Pleiotrophin OS=Homo sapiens OX=9606 GN=PTN PE=1 SV=1	0.396	Down	7.3648e-07	PTN	18.942	1.649	1.595	1.764	1.113	1.576	1.609	1.306	2.11	0.376	0.571	0.876	0.638	0.507	0.55	0.845	0.673	extracellular	single organism signaling; regulation of cell death; gland development; regulation of gliogenesis; positive regulation of neuromuscular junction development; reproductive process; retina morphogenesis in camera-type eye; respiratory tube development; response to platelet-derived growth factor; neural retina development; response to ciliary neurotrophic factor; regulation of cell shape; sensory or…	intracellular organelle; membrane; endoplasmic reticulum; extracellular space; extracellular region part; neuromuscular junction; cytoplasm; endomembrane system; intracellular part; cell; extracellular matrix component; extracellular region; synapse; basement membrane; organelle; extracellular matrix; intracellular membrane-bounded organelle; intracellular; cell part; perinuclear region of cytopl…	growth factor activity; chondroitin sulfate binding; vascular endothelial growth factor binding; growth factor binding; receptor binding; protein phosphatase regulator activity; ion binding; proteoglycan binding; heparan sulfate binding; protein binding; chondroitin sulfate proteoglycan binding; enzyme inhibitor activity; molecular function regulator; heparin binding; sulfur compound binding; pro…	K16642			IPR020089; IPR020090; IPR020091;	Pleiotrophin/Midkine, N-terminal domain; Pleiotrophin/Midkine, C-terminal domain; Pleiotrophin/Midkine disulphide-rich domain;
Q8WXA2	Prostate and testis expressed protein 1 OS=Homo sapiens OX=9606 GN=PATE1 PE=1 SV=1	0.559	Down	0.02448	PATE1	14.271					0.939	1.723	1.507	1.362					0.825	0.78	0.747	0.742	extracellular		extracellular region;	protein binding; binding;
Q08945	FACT complex subunit SSRP1 OS=Homo sapiens OX=9606 GN=SSRP1 PE=1 SV=1	1.592	Up	0.0060582	SSRP1	81.074	0.776	0.798	0.76	0.755	0.662	0.789	0.696	0.678	1.162	1.782	0.91	0.908	0.889	1.782	0.871	1.114	nucleus	nucleic acid-templated transcription; regulation of signaling; biosynthetic process; DNA-templated transcription, elongation; cellular metabolic process; regulation of RNA biosynthetic process; metabolic process; regulation of cell communication; macromolecule metabolic process; cellular response to stimulus; regulation of gene expression; heterocycle biosynthetic process; regulation of cellular …	intracellular organelle; intracellular non-membrane-bounded organelle; intracellular organelle part; nuclear lumen; intracellular part; nucleolus; cell; organelle part; non-membrane-bounded organelle; organelle; intracellular membrane-bounded organelle; membrane-enclosed lumen; nucleoplasm; nucleus; intracellular organelle lumen; cell part; intracellular; chromosome; membrane-bounded organelle; o…	organic cyclic compound binding; heterocyclic compound binding; DNA binding; RNA binding; protein binding; chromatin binding; binding; nucleic acid binding;	K09272			IPR013719; IPR011993; IPR009071; IPR024954;	Domain of unknown function DUF1747; PH domain-like; High mobility group box domain; SSRP1 domain;	KLB	KOG0526	Nucleosome-binding factor SPN, POB3 subunit
Q12788	Transducin beta-like protein 3 OS=Homo sapiens OX=9606 GN=TBL3 PE=1 SV=2	1.51	Up	3.894e-05	TBL3	89.034	0.837	0.864	0.794	0.948	0.758	0.738	0.813	0.671	1.264	1.322	1.05	1.069	1.309	1.617	1.027	1.038	cytoplasm	rRNA metabolic process; RNA processing; ncRNA processing; cellular component biogenesis; ribonucleoprotein complex biogenesis; cellular aromatic compound metabolic process; ribosomal small subunit biogenesis; nitrogen compound metabolic process; ribosome biogenesis; organic cyclic compound metabolic process; primary metabolic process; cellular metabolic process; organic substance metabolic proces…	Pwp2p-containing subcomplex of 90S preribosome; intracellular organelle; intracellular non-membrane-bounded organelle; intracellular organelle part; nuclear lumen; macromolecular complex; intracellular part; nucleolar part; nucleolus; cell; organelle part; non-membrane-bounded organelle; preribosome; intracellular membrane-bounded organelle; membrane-enclosed lumen; organelle; nucleoplasm; nucleu…	snoRNA binding; organic cyclic compound binding; heterocyclic compound binding; RNA binding; protein binding; binding; nucleic acid binding;	K14555	UTP13; U3 small nucleolar RNA-associated protein 13	hsa03008 Ribosome biogenesis in eukaryotes;	IPR017986; IPR015943; IPR013934; IPR011044;	WD40-repeat-containing domain; WD40/YVTN repeat-like-containing domain; Small-subunit processome, Utp13; Quinoprotein amine dehydrogenase, beta chain-like;	A	KOG0319	WD40-repeat-containing subunit of the 18S rRNA processing complex
Q69YN4	Protein virilizer homolog OS=Homo sapiens OX=9606 GN=VIRMA PE=1 SV=2	1.524	Up	4.4424e-06	VIRMA	202.02	0.828	0.744	0.72	0.812	0.728	0.839	0.75	0.86	0.989	1.595	1.219	1.052	1.156	1.345	1.03	1.185	nucleus	RNA processing; cellular aromatic compound metabolic process; mRNA modification; mRNA methylation; organic cyclic compound metabolic process; nitrogen compound metabolic process; primary metabolic process; RNA modification; cellular metabolic process; methylation; organic substance metabolic process; mRNA processing; RNA metabolic process; metabolic process; nucleic acid metabolic process; hetero…	intracellular organelle; cytoplasm; intracellular organelle part; nuclear lumen; intracellular part; cytosol; nuclear body; cell; organelle part; organelle; intracellular membrane-bounded organelle; membrane-enclosed lumen; nucleoplasm; nucleus; intracellular organelle lumen; nuclear speck; cell part; intracellular; membrane-bounded organelle; nucleoplasm part; cytoplasmic part; organelle lumen; …	organic cyclic compound binding; heterocyclic compound binding; RNA binding; binding; nucleic acid binding;				IPR016024; IPR031801;	Armadillo-type fold; Virilizer, N-terminal;	AT	KOG4822	Predicted nuclear membrane protein involved in mRNA transport and sex determination via splicing modulation
P51575	P2X purinoceptor 1 OS=Homo sapiens OX=9606 GN=P2RX1 PE=1 SV=1	0.404	Down	0.028919	P2RX1	44.98					2.37	1.436	0.8	1.894					1.051	0.435	0.445	0.696	plasma membrane	single organism signaling; cellular component biogenesis; regulation of cell death; blood coagulation; regulation of biological quality; leukocyte activation; positive regulation of cellular protein metabolic process; cell surface receptor signaling pathway; reproductive process; ceramide metabolic process; serotonin secretion by platelet; response to organophosphorus; cellular lipid metabolic pr…	membrane; cytoplasmic vesicle; organelle membrane; membrane microdomain; cell periphery; vesicle; cytoplasm; cytoplasmic vesicle part; macromolecular complex; intrinsic component of membrane; intracellular part; integral component of plasma membrane; cell; organelle part; nuclear membrane; plasma membrane region; intrinsic component of nuclear inner membrane; integral component of organelle membr…	ATP-gated ion channel activity; nucleotide receptor activity; extracellular ligand-gated ion channel activity; nucleoside phosphate binding; passive transmembrane transporter activity; substrate-specific transporter activity; transmembrane signaling receptor activity; signal transducer activity; channel activity; substrate-specific transmembrane transporter activity; heterocyclic compound binding…	K05215	P2RX1; P2X purinoceptor 1	hsa04611 Platelet activation; hsa04020 Calcium signaling pathway; hsa04080 Neuroactive ligand-receptor interaction;	IPR027309;	P2X purinoreceptor extracellular domain;
O43301	Heat shock 70 kDa protein 12A OS=Homo sapiens OX=9606 GN=HSPA12A PE=1 SV=2	0.545	Down	0.00033792	HSPA12A	74.977	1.305	1.119	1.492	1.4	1.428	1.586	1.359	1.456	0.842	0.462	0.784	0.977	0.867	0.619	0.539	0.985	cytoplasm		extracellular exosome; organelle; extracellular region part; vesicle; extracellular vesicle; membrane-bounded organelle; extracellular region; extracellular organelle;	ATP binding; nucleoside phosphate binding; nucleoside binding; ion binding; nucleotide binding; organic cyclic compound binding; heterocyclic compound binding; ribonucleoside binding; carbohydrate derivative binding; ribonucleotide binding; binding; purine ribonucleoside binding; anion binding; purine ribonucleotide binding; adenyl ribonucleotide binding; adenyl nucleotide binding; purine nucleos…						O	KOG0101	Molecular chaperones HSP70/HSC70, HSP70 superfamily
Q8WXX0	"""Dynein heavy chain 7, axonemal OS=Homo sapiens OX=9606 GN=DNAH7 PE=1 SV=2"""	3.444	Up	0.00135952	DNAH7	461.15	0.345	0.699	0.326	0.561	0.791	0.315	0.166	0.227	0.738	2.568	0.758	1.471	3.486	0.56	1.215	1.016	cytoplasm	cellular component biogenesis; cellular component organization; localization of cell; cilium assembly; single-organism process; inner dynein arm assembly; axonemal dynein complex assembly; cilium organization; cellular component assembly; organelle assembly; macromolecular complex assembly; cytoskeleton organization; cellular process; protein complex assembly; cellular protein complex assembly; c…	microtubule; cytoplasm; axonemal dynein complex; macromolecular complex; intracellular part; supramolecular fiber; supramolecular complex; cell; organelle part; non-membrane-bounded organelle; cytoskeleton; catalytic complex; ciliary part; microtubule cytoskeleton; intracellular; cell part; axoneme; inner dynein arm; axoneme part; cilium; intracellular organelle; cell projection; polymeric cytosk…	motor activity; nucleoside phosphate binding; hydrolase activity, acting on acid anhydrides; hydrolase activity; organic cyclic compound binding; heterocyclic compound binding; pyrophosphatase activity; catalytic activity; ribonucleotide binding; binding; purine ribonucleoside binding; cation binding; anion binding; adenyl ribonucleotide binding; adenyl nucleotide binding; microtubule motor activ…	K10408	DNAH; dynein heavy chain, axonemal	hsa05016 Huntington's disease;	IPR024317; IPR004273; IPR003593; IPR013602; IPR027417; IPR024743; IPR002048;	Dynein heavy chain, P-loop containing D4 domain; Dynein heavy chain domain; AAA+ ATPase domain; Dynein heavy chain, domain-2; P-loop containing nucleoside triphosphate hydrolase; Dynein heavy chain, coiled coil stalk; EF-hand domain;	Z	KOG3595	Dyneins, heavy chain
Q13310	Polyadenylate-binding protein 4 OS=Homo sapiens OX=9606 GN=PABPC4 PE=1 SV=1	1.516	Up	6.3899e-05	PABPC4	70.782	0.817	0.953	0.815	0.724	0.763	0.728	0.712	0.781	1.139	1.586	0.934	0.989	1.391	1.326	1.136	1.04	nucleus	single-multicellular organism process; blood coagulation; regulation of biological quality; peptide metabolic process; cellular aromatic compound metabolic process; cellular protein metabolic process; single-organism process; biosynthetic process; organonitrogen compound biosynthetic process; response to stimulus; cellular metabolic process; hemostasis; organic substance metabolic process; respon…	cytoplasmic stress granule; intracellular organelle; intracellular non-membrane-bounded organelle; cytoplasm; macromolecular complex; intracellular part; cytosol; cell; cytoplasmic ribonucleoprotein granule; non-membrane-bounded organelle; intracellular membrane-bounded organelle; organelle; nucleus; cell part; intracellular; ribonucleoprotein granule; ribonucleoprotein complex; membrane-bounded …	poly(A) binding; organic cyclic compound binding; heterocyclic compound binding; RNA binding; poly-pyrimidine tract binding; nucleoside phosphate binding; binding; nucleic acid binding; protein binding; nucleotide binding; poly(U) RNA binding; poly-purine tract binding; small molecule binding; single-stranded RNA binding;	K13126	PABPC; polyadenylate-binding protein	hsa03018 RNA degradation; hsa03015 mRNA surveillance pathway; hsa03013 RNA transport;	IPR002004; IPR000504; IPR012677; IPR003954;	Polyadenylate-binding protein/Hyperplastic disc protein; RNA recognition motif domain; Nucleotide-binding alpha-beta plait domain; RNA recognition motif domain, eukaryote;	AJ	KOG0123	Polyadenylate-binding protein (RRM superfamily)
Q6GPH4	XIAP-associated factor 1 OS=Homo sapiens OX=9606 GN=XAF1 PE=1 SV=1	2.499	Up	0.0039015	XAF1	34.626					0.556	0.453	0.433	0.798					1.741	1.523	1.441	0.892	extracellular	regulation of cellular process; single organism signaling; response to interferon-beta; type I interferon signaling pathway; cell surface receptor signaling pathway; negative regulation of cellular component organization; cellular response to organic substance; single-organism process; regulation of cellular component biogenesis; negative regulation of biological process; negative regulation of c…	organelle; intracellular membrane-bounded organelle; intracellular organelle; nucleus; cell part; intracellular; cytoplasm; intracellular part; cytosol; membrane-bounded organelle; cell; mitochondrion; cytoplasmic part;	metal ion binding; cation binding; zinc ion binding; transition metal ion binding; binding; ion binding;				IPR001293;	Zinc finger, TRAF-type;
P05164	Myeloperoxidase OS=Homo sapiens OX=9606 GN=MPO PE=1 SV=1	1.703	Up	0.0144814	MPO	83.868	0.622	1.154	0.506	0.642	1.406	0.456	0.428	0.646	1.03	1.016	1.206	1.789	1.796	0.549	1.364	1.229	extracellular	superoxide metabolic process; regulation of cell death; leukocyte activation; defense response to other organism; cellular metabolic process; response to yeast; response to biotic stimulus; removal of superoxide radicals; response to external stimulus; metabolic process; protein-lipid complex subunit organization; cellular oxidant detoxification; single-organism transport; secretion; cellular res…	secretory granule lumen; extracellular space; extracellular region part; cytoplasmic vesicle; cytoplasm; vesicle; cytoplasmic vesicle part; intracellular part; azurophil granule lumen; cell; organelle part; vacuolar lumen; extracellular exosome; membrane-enclosed lumen; vesicle lumen; intracellular organelle lumen; intracellular; cell part; secretory vesicle; lysosome; extracellular vesicle; secr…	ion binding; antioxidant activity; chromatin binding; heparin binding; sulfur compound binding; oxidoreductase activity; heterocyclic compound binding; organic cyclic compound binding; heme binding; carbohydrate derivative binding; catalytic activity; binding; cation binding; metal ion binding; anion binding; peroxidase activity; glycosaminoglycan binding; tetrapyrrole binding; oxidoreductase act…	K10789	MPO; myeloperoxidase [EC:1.11.2.2]	hsa04145 Phagosome; hsa05202 Transcriptional misregulation in cancer;			R	KOG2408	Peroxidase/oxygenase
Q9UBD6	Ammonium transporter Rh type C OS=Homo sapiens OX=9606 GN=RHCG PE=1 SV=1	0.601	Down	0.0036196	RHCG	53.178	1.431	1.442	1.296	0.884	1.168	1.464	1.35	1.954	1.165	0.662	0.913	0.764	0.531	0.407	1.254	0.908	plasma membrane	regulation of biological quality; ion transmembrane transport; regulation of pH; cellular developmental process; single-organism process; ammonium transmembrane transport; cellular chemical homeostasis; establishment of localization; organic cation transport; homeostatic process; cell differentiation; single-organism localization; transepithelial transport; cation homeostasis; cation transport; c…	intracellular vesicle; intracellular organelle; basolateral plasma membrane; membrane; extracellular region part; intrinsic component of plasma membrane; apical plasma membrane; cytoplasmic vesicle; cell periphery; cytoplasm; vesicle; intrinsic component of membrane; intracellular part; integral component of plasma membrane; cell; extracellular region; integral component of membrane; plasma membr…	ammonium transmembrane transporter activity; cytoskeletal protein binding; ion transmembrane transporter activity; binding; substrate-specific transporter activity; protein binding; ankyrin binding; cation transmembrane transporter activity; substrate-specific transmembrane transporter activity; transmembrane transporter activity; transporter activity;	K06580			IPR024041; IPR029020;	Ammonium transporter AmtB-like domain; Ammonium/urea transporter;	UR	KOG3796	Ammonium transporter RHBG
Q9UGT4	Sushi domain-containing protein 2 OS=Homo sapiens OX=9606 GN=SUSD2 PE=1 SV=1	0.552	Down	3.6636e-05	SUSD2	90.207	0.993	1.294	1.468	1.255	1.486	1.307	1.784	1.589	0.845	0.781	1.062	0.721	0.947	0.655	0.556	0.604	extracellular	negative regulation of cell division; regulation of cellular process; negative regulation of cell cycle G1/S phase transition; negative regulation of cell cycle; negative regulation of cell cycle phase transition; vesicle-mediated transport; immune system process; negative regulation of biological process; negative regulation of cellular process; response to stimulus; endocytosis; regulation of c…	membrane; extracellular region part; cell periphery; vesicle; intrinsic component of membrane; cell; integral component of membrane; extracellular region; plasma membrane; organelle; extracellular exosome; membrane part; cell part; extracellular vesicle; membrane-bounded organelle; extracellular organelle;	molecular transducer activity; receptor activity; polysaccharide binding; binding; carbohydrate binding; cargo receptor activity; protein binding; scavenger receptor activity; pattern binding;				IPR000436; IPR001846; IPR005533; IPR001212;	Sushi/SCR/CCP domain; von Willebrand factor, type D domain; AMOP domain; Somatomedin B domain;	W	KOG4291	Mucin/alpha-tectorin
Q9HCU0	Endosialin OS=Homo sapiens OX=9606 GN=CD248 PE=1 SV=1	0.641	Down	0.00151869	CD248	80.858	0.969	1.44	0.973	1.276	1.78	1.242	1.314	1.371	0.8	0.882	0.896	0.951	1.273	0.597	0.612	0.635	peroxisome	regulation of cellular process; single-multicellular organism process; cell migration; regulation of cell death; regulation of endothelial cell apoptotic process; regulation of cell proliferation; localization of cell; regulation of programmed cell death; positive regulation of apoptotic process; single-organism process; anatomical structure morphogenesis; multicellular organism development; cell…	membrane; extracellular region part; cytoplasm; vesicle; intrinsic component of membrane; intracellular part; cell; integral component of membrane; extracellular region; organelle; extracellular exosome; extracellular matrix; membrane part; intracellular; cell part; extracellular vesicle; proteinaceous extracellular matrix; membrane-bounded organelle; extracellular organelle;	binding; ion binding; carbohydrate binding; metal ion binding; cation binding; protein binding; calcium ion binding; extracellular matrix binding;	K06706			IPR001304; IPR016187; IPR001881; IPR000742; IPR009030; IPR016186;	C-type lectin-like; C-type lectin fold; EGF-like calcium-binding domain; EGF-like domain; Growth factor receptor cysteine-rich domain; C-type lectin-like/link domain;	T	KOG1218	Proteins containing Ca2+-binding EGF-like domains
Q99848	Probable rRNA-processing protein EBP2 OS=Homo sapiens OX=9606 GN=EBNA1BP2 PE=1 SV=2	1.54	Up	0.0043016	EBNA1BP2	34.852	0.752	0.938	0.766	0.917	0.679	0.73	0.79	0.725	0.871	1.699	1.039	0.954	1.571	1.615	1.014	0.936	nucleus	rRNA metabolic process; RNA processing; ncRNA processing; cellular component biogenesis; ribonucleoprotein complex biogenesis; cellular aromatic compound metabolic process; nitrogen compound metabolic process; ribosome biogenesis; organic cyclic compound metabolic process; primary metabolic process; cellular metabolic process; ribosomal large subunit biogenesis; organic substance metabolic proces…	intracellular organelle; intracellular non-membrane-bounded organelle; intracellular organelle part; nuclear lumen; macromolecular complex; intracellular part; nucleolus; cell; organelle part; non-membrane-bounded organelle; preribosome; membrane-enclosed lumen; intracellular membrane-bounded organelle; organelle; nucleus; intracellular organelle lumen; intracellular; cell part; preribosome, larg…	organic cyclic compound binding; heterocyclic compound binding; RNA binding; binding; nucleic acid binding;	K14823					A	KOG3080	Nucleolar protein-like/EBNA1-binding protein
Q9Y689	ADP-ribosylation factor-like protein 5A OS=Homo sapiens OX=9606 GN=ARL5A PE=1 SV=1	1.587	Up	0.046257	ARL5A	20.728					0.947	0.97	0.559	0.561					1.614	1.042	0.978	1.187	mitochondria	regulation of cellular process; single organism signaling; cellular response to stimulus; signal transduction; regulation of biological process; cell communication; intracellular signal transduction; single-organism process; small GTPase mediated signal transduction; signaling; response to stimulus; cellular process; biological regulation;	cell; intracellular; cell part;	nucleoside phosphate binding; nucleoside binding; ion binding; nucleotide binding; heterocyclic compound binding; organic cyclic compound binding; ribonucleoside binding; carbohydrate derivative binding; ribonucleotide binding; binding; purine ribonucleoside binding; anion binding; purine ribonucleotide binding; guanyl ribonucleotide binding; purine nucleoside binding; guanyl nucleotide binding; …	K07949			IPR005225; IPR027417;	Small GTP-binding protein domain; P-loop containing nucleoside triphosphate hydrolase;	U	KOG0070	GTP-binding ADP-ribosylation factor Arf1
P07585	Decorin OS=Homo sapiens OX=9606 GN=DCN PE=1 SV=1	0.376	Down	0.000103515	DCN	39.746	1.332	0.964	2.889	1.229	1.511	1.411	1.105	2.531	0.466	0.433	0.707	0.61	1.076	0.586	0.374	0.63	extracellular	single organism signaling; reproductive process; positive regulation of biosynthetic process; regulation of mitochondrion organization; cellular metabolic process; regulation of endothelial cell migration; positive regulation of membrane depolarization; response to biotic stimulus; glycosaminoglycan metabolic process; negative regulation of vascular endothelial growth factor signaling pathway; me…	extracellular space; extracellular region part; cytoplasm; macromolecular complex; supramolecular fiber; intracellular part; supramolecular complex; cell; collagen trimer; organelle part; vacuolar lumen; membrane-enclosed lumen; intracellular organelle lumen; intracellular; cell part; lysosome; Golgi apparatus part; membrane-bounded organelle; organelle lumen; lytic vacuole; intracellular organel…	RNA binding; protein N-terminus binding; macromolecular complex binding; protein binding; protein kinase inhibitor activity; protein kinase regulator activity; kinase regulator activity; enzyme inhibitor activity; molecular function regulator; extracellular matrix binding; organic cyclic compound binding; heterocyclic compound binding; carbohydrate derivative binding; enzyme regulator activity; k…	K04660	DCN; decorin	hsa04350 TGF-beta signaling pathway; hsa05205 Proteoglycans in cancer;	IPR000372; IPR032675;	Leucine-rich repeat N-terminal domain; Leucine-rich repeat domain, L domain-like;	R	KOG0619	FOG: Leucine rich repeat
Q96AG4	Leucine-rich repeat-containing protein 59 OS=Homo sapiens OX=9606 GN=LRRC59 PE=1 SV=1	1.655	Up	1.3118e-08	LRRC59	34.93	0.805	0.883	0.693	0.763	0.681	0.699	0.716	0.661	1.291	1.271	1.072	1.289	1.067	1.304	1.195	1.279	cyto_pero		membrane; nuclear outer membrane-endoplasmic reticulum membrane network; endoplasmic reticulum; organelle membrane; cytoplasm; intrinsic component of membrane; intracellular part; cell; organelle part; non-membrane-bounded organelle; membrane-enclosed lumen; intracellular organelle lumen; membrane part; intracellular; cell part; membrane-bounded organelle; endoplasmic reticulum membrane; organell…	organic cyclic compound binding; heterocyclic compound binding; cell adhesion molecule binding; RNA binding; binding; cadherin binding; nucleic acid binding; protein binding;				IPR032675;	Leucine-rich repeat domain, L domain-like;	S	KOG0473	Leucine-rich repeat protein
B9A064	Immunoglobulin lambda-like polypeptide 5 OS=Homo sapiens OX=9606 GN=IGLL5 PE=2 SV=2	0.587	Down	0.032418	IGLL5	23.063	1.425	1.861	0.882	1.131					0.916	0.768	0.601	0.824					nucleus	single organism signaling; regulation of leukocyte activation; immunoglobulin mediated immune response; cell surface receptor signaling pathway; defense response to other organism; single-organism process; regulation of lymphocyte activation; response to biotic stimulus; establishment of localization; phagocytosis; complement activation; response to external stimulus; metabolic process; signal tr…	membrane; extracellular space; extracellular region part; external side of plasma membrane; cell periphery; immunoglobulin complex, circulating; immunoglobulin complex; vesicle; macromolecular complex; cell; extracellular region; plasma membrane; organelle; extracellular exosome; blood microparticle; plasma membrane part; membrane part; cell part; extracellular vesicle; cell surface; protein comp…	immunoglobulin receptor binding; protein binding; receptor binding; antigen binding; binding;				IPR007110; IPR013783; IPR003597;	Immunoglobulin-like domain; Immunoglobulin-like fold; Immunoglobulin C1-set;
P00740	Coagulation factor IX OS=Homo sapiens OX=9606 GN=F9 PE=1 SV=2	0.604	Down	5.3748e-07	F9	51.778	1.357	1.298	1.375	1.01	1.414	1.573	1.499	1.329	0.949	0.784	0.864	0.726	0.75	0.697	0.893	0.892	extracellular	intracellular transport; single-multicellular organism process; blood coagulation; regulation of biological quality; peptide metabolic process; blood coagulation, extrinsic pathway; signal peptide processing; cellular protein metabolic process; Golgi vesicle transport; single-organism process; protein processing; response to stimulus; cellular metabolic process; hemostasis; establishment of local…	membrane; extracellular space; extracellular region part; endoplasmic reticulum; cell periphery; vesicle; cytoplasm; intracellular part; cell; organelle part; extracellular exosome; membrane-enclosed lumen; intracellular organelle lumen; cell part; intracellular; extracellular vesicle; Golgi apparatus part; membrane-bounded organelle; organelle lumen; intracellular organelle; endoplasmic reticulu…	serine-type endopeptidase activity; endopeptidase activity; peptidase activity; serine hydrolase activity; catalytic activity; binding; ion binding; serine-type peptidase activity; metal ion binding; cation binding; peptidase activity, acting on L-amino acid peptides; hydrolase activity; protein binding; calcium ion binding;	K01321	F9; coagulation factor IX (Christmas factor) [EC:3.4.21.22]	hsa04610 Complement and coagulation cascades;	IPR009003; IPR017857; IPR000294; IPR001254; IPR001881; IPR000742;	Peptidase S1, PA clan; Coagulation factor, subgroup, Gla domain; Gamma-carboxyglutamic acid-rich (GLA) domain; Serine proteases, trypsin domain; EGF-like calcium-binding domain; EGF-like domain;	E	KOG3627	Trypsin
P28838	Cytosol aminopeptidase OS=Homo sapiens OX=9606 GN=LAP3 PE=1 SV=3	1.518	Up	0.0191633	LAP3	56.166	0.884	0.791	0.699	0.745	0.768	0.803	0.749	0.795	0.872	2.05	0.756	0.946	1.297	1.482	1.211	0.851	mitochondria	proteolysis; metabolic process; macromolecule metabolic process; protein metabolic process; primary metabolic process; organic substance metabolic process;	extracellular region part; cell junction; vesicle; cytoplasm; intracellular part; cell; organelle part; membrane-enclosed lumen; extracellular exosome; nucleoplasm; focal adhesion; intracellular organelle lumen; intracellular; cell part; Golgi subcompartment; adherens junction; extracellular vesicle; Golgi apparatus part; cell-substrate junction; membrane-bounded organelle; cell-substrate adheren…	exopeptidase activity; peptidase activity; transition metal ion binding; catalytic activity; binding; ion binding; metalloexopeptidase activity; cation binding; metal ion binding; peptidase activity, acting on L-amino acid peptides; aminopeptidase activity; hydrolase activity; metallopeptidase activity; manganese ion binding;	K11142	LAP3; cytosol aminopeptidase [EC:3.4.11.1 3.4.11.5]	hsa00480 Glutathione metabolism; hsa01100 Metabolic pathways; hsa00330 Arginine and proline metabolism;	IPR000819; IPR008283;	Peptidase M17, leucyl aminopeptidase, C-terminal; Peptidase M17, leucyl aminopeptidase, N-terminal;	R	KOG2597	Predicted aminopeptidase of the M17 family
Q8N4X5	Actin filament-associated protein 1-like 2 OS=Homo sapiens OX=9606 GN=AFAP1L2 PE=1 SV=1	1.712	Up	0.00105705	AFAP1L2	91.299	0.616	0.663	0.663	0.849	0.654	0.638	1.057	0.88	1.687	1.04	1.152	1.454	1.533	0.684	1.596	1.161	nucleus	positive regulation of cellular protein metabolic process; regulation of signaling; positive regulation of biosynthetic process; positive regulation of epidermal growth factor receptor signaling pathway; regulation of RNA biosynthetic process; regulation of cell communication; positive regulation of multicellular organismal process; positive regulation of metabolic process; positive regulation of…	membrane; cell periphery; cell part; intracellular; cytoplasm; intracellular part; cell; cytosol; plasma membrane; cytoplasmic part;	kinase activator activity; enzyme regulator activity; protein kinase activator activity; signaling adaptor activity; binding; protein tyrosine kinase activator activity; SH2 domain binding; binding, bridging; protein domain specific binding; protein binding; protein kinase regulator activity; kinase regulator activity; molecular function regulator; SH3 domain binding; enzyme activator activity;				IPR011993; IPR001849;	PH domain-like; Pleckstrin homology domain;
Q9Y5T5	Ubiquitin carboxyl-terminal hydrolase 16 OS=Homo sapiens OX=9606 GN=USP16 PE=1 SV=1	1.691	Up	0.00070407	USP16	93.569	0.858	0.938	0.656	0.688	0.693	0.452	0.564	1.092	1.263	1.738	0.92	0.976	1.062	1.314	1.423	1.348	nucleus	cellular component biogenesis; positive regulation of cellular protein metabolic process; posttranscriptional regulation of gene expression; nucleic acid-templated transcription; positive regulation of biosynthetic process; cellular metabolic process; protein K63-linked deubiquitination; metabolic process; macromolecular complex assembly; macromolecule metabolic process; protein metabolic process…	intracellular organelle; intracellular organelle part; cytoplasm; nuclear lumen; intracellular part; cell; organelle part; organelle; intracellular membrane-bounded organelle; membrane-enclosed lumen; nucleoplasm; nucleus; intracellular organelle lumen; intracellular; cell part; membrane-bounded organelle; organelle lumen; nuclear part;	histone binding; thiol-dependent ubiquitin-specific protease activity; peptidase activity; ion binding; ubiquitin-like protein-specific protease activity; protein binding; hydrolase activity; cysteine-type peptidase activity; transcription cofactor activity; zinc ion binding; ubiquitin-like protein binding; endopeptidase activity; transition metal ion binding; thiol-dependent ubiquitinyl hydrolas…	K11844			IPR001607; IPR013083; IPR028889; IPR001394;	Zinc finger, UBP-type; Zinc finger, RING/FYVE/PHD-type; Ubiquitin specific protease domain; Peptidase C19, ubiquitin carboxyl-terminal hydrolase;	O	KOG1873	Ubiquitin-specific protease
Q9BVL4	Selenoprotein O OS=Homo sapiens OX=9606 GN=SELENOO PE=1 SV=3	0.561	Down	0.0026615	SELENOO	73.488	1.554	1.556	1.198	1.065					0.689	0.9	0.672	0.755					mitochondria		organelle; intracellular membrane-bounded organelle; intracellular organelle; cell part; intracellular; cytoplasm; intracellular part; membrane-bounded organelle; cell; mitochondrion; cytoplasmic part;							S	KOG2542	Uncharacterized conserved protein (YdiU family)
O43795	Unconventional myosin-Ib OS=Homo sapiens OX=9606 GN=MYO1B PE=1 SV=3	2.039	Up	1.71096e-05	MYO1B	131.98	0.586	0.616	0.531	0.896	0.621	0.601	0.76	0.606	1.504	1.131	1.254	1.604	1.672	0.779	1.153	1.541	cytoplasm	cellular component biogenesis; actin filament-based movement; cellular component organization; vesicle-mediated transport; single-organism cellular process; Golgi vesicle transport; actin filament organization; single-organism process; actin filament bundle assembly; establishment of localization; actin filament bundle organization; transport; single-organism organelle organization; actin cytoske…	membrane; extracellular region part; cluster of actin-based cell projections; brush border; cytoplasmic vesicle; organelle membrane; cell periphery; cytoplasm; vesicle; cytoplasmic vesicle part; macromolecular complex; supramolecular fiber; intracellular part; supramolecular complex; actin-based cell projection; cell; organelle part; early endosome; non-membrane-bounded organelle; cytoskeleton; e…	actin filament binding; motor activity; nucleoside phosphate binding; hydrolase activity, acting on acid anhydrides; hydrolase activity; protein binding; ATPase activity; phosphatidylinositol bisphosphate binding; organic cyclic compound binding; heterocyclic compound binding; pyrophosphatase activity; cytoskeletal protein binding; catalytic activity; ribonucleotide binding; phosphatidylinositol-…	K10356			IPR010926; IPR027417; IPR001609;	Class I myosin tail homology domain; P-loop containing nucleoside triphosphate hydrolase; Myosin head, motor domain;	Z	KOG0164	Myosin class I heavy chain
A1L4H1	Soluble scavenger receptor cysteine-rich domain-containing protein SSC5D OS=Homo sapiens OX=9606 GN=SSC5D PE=1 SV=3	0.389	Down	0.0066399	SSC5D	165.74	0.954	1.399	1.427	2.423					0.646	0.42	0.663	0.682					extracellular	detection of chemical stimulus; defense response to other organism; single-organism process; negative regulation of multicellular organismal process; regulation of secretion; detection of external biotic stimulus; negative regulation of cytokine production; negative regulation of cytokine secretion; establishment of localization; response to biotic stimulus; response to external stimulus; negativ…	extracellular matrix; membrane; extracellular space; extracellular region part; cell part; intracellular; cytoplasm; intracellular part; cell; extracellular region;	molecular transducer activity; receptor activity; fibronectin binding; laminin binding; binding; cargo receptor activity; protein binding; scavenger receptor activity; extracellular matrix binding;				IPR001190; IPR017448;	SRCR domain; SRCR-like domain;	E	KOG3627	Trypsin
Q56VL3	OCIA domain-containing protein 2 OS=Homo sapiens OX=9606 GN=OCIAD2 PE=1 SV=1	1.686	Up	0.00021693	OCIAD2	16.953	0.867	0.746	0.769	0.883	0.551	0.754	0.697	0.595	0.934	0.934	1.417	1.498	0.994	1.777	1.107	1.222	extracellular		membrane; intracellular vesicle; intracellular organelle; mitochondrial part; organelle membrane; cytoplasmic vesicle; organelle envelope; intracellular organelle part; cytoplasm; vesicle; endomembrane system; intracellular part; cell; organelle part; mitochondrion; intracellular membrane-bounded organelle; mitochondrial envelope; organelle; intracellular; cell part; envelope; organelle inner mem…					IPR009764;	Ovarian carcinoma immunoreactive antigen;
P02787	Serotransferrin OS=Homo sapiens OX=9606 GN=TF PE=1 SV=3	0.565	Down	1.0553e-08	TF	77.063	1.302	1.374	1.326	1.391	1.307	1.638	1.194	1.364	0.818	0.646	0.77	0.782	0.663	0.771	0.788	0.919	extracellular	regulation of vesicle-mediated transport; regulation of biological quality; single-organism process; multicellular organismal homeostasis; protein transport; iron ion import into cell; establishment of localization; positive regulation of cellular component organization; transition metal ion transport; regulation of localization; metal ion homeostasis; response to inorganic substance; macromolecu…	membrane; extracellular region part; external side of plasma membrane; extrinsic component of membrane; organelle membrane; cytoplasm; cytoplasmic vesicle part; macromolecular complex; cell; organelle part; early endosome; extracellular exosome; plasma membrane region; clathrin-coated vesicle; intracellular; secretory vesicle; membrane region; membrane-bounded organelle; apical part of cell; orga…	iron ion binding; ion transmembrane transporter activity; receptor binding; ion binding; transition metal ion transmembrane transporter activity; substrate-specific transporter activity; protein binding; substrate-specific transmembrane transporter activity; trivalent inorganic cation transmembrane transporter activity; metal ion transmembrane transporter activity; ferric iron transmembrane trans…	K14736	TF; transferrin	hsa04978 Mineral absorption; hsa04066 HIF-1 signaling pathway;	IPR001156;	Transferrin-like domain;
P10909	Clusterin OS=Homo sapiens OX=9606 GN=CLU PE=1 SV=1	0.546	Down	2.3646e-08	CLU	52.494	1.42	1.422	1.218	1.36	1.394	1.281	1.65	1.324	0.856	0.593	0.802	0.716	0.656	0.725	0.813	0.879	extracellular	cellular component biogenesis; single organism signaling; negative regulation of beta-amyloid formation; regulation of cell death; negative regulation of cellular response to thapsigargin; ensheathment of neurons; regulation of tumor necrosis factor production; positive regulation of proteasomal ubiquitin-dependent protein catabolic process; negative regulation of release of cytochrome c from mit…	dendrite; membrane; extracellular region part; organelle membrane; cytoplasm; cytoplasmic vesicle part; macromolecular complex; cell; organelle part; extracellular exosome; intracellular; lipoprotein particle; secretory vesicle; neuron projection; neurofibrillary tangle; membrane-bounded organelle; neuron part; organelle lumen; cell projection; inclusion body; organelle envelope; extracellular re…	misfolded protein binding; protein binding; ubiquitin protein ligase binding; ubiquitin-like protein ligase binding; chaperone binding; binding; enzyme binding;	K17252	CLU; clusterin	hsa04610 Complement and coagulation cascades;	IPR016015; IPR016014;	Clusterin, C-terminal; Clusterin, N-terminal;
P23284	Peptidyl-prolyl cis-trans isomerase B OS=Homo sapiens OX=9606 GN=PPIB PE=1 SV=2	1.534	Up	0.00069884	PPIB	23.742	1.019	0.974	0.674	0.806	0.661	0.758	0.718	0.624	1.438	1.051	0.787	1.356	1.009	1.256	1.199	1.466	extracellular	regulation of biological quality; modulation by host of viral genome replication; chaperone-mediated protein folding; single-organism process; modification of morphology or physiology of other organism; cellular metabolic process; positive regulation of growth; protein folding; metabolic process; positive regulation of multicellular organismal process; macromolecule metabolic process; protein met…	smooth endoplasmic reticulum; membrane; extracellular region part; endoplasmic reticulum; cytoplasmic vesicle; cell junction; vesicle; cytoplasm; macromolecular complex; intracellular part; cell; organelle part; pigment granule; extracellular exosome; membrane-enclosed lumen; focal adhesion; intracellular organelle lumen; intracellular; cell part; adherens junction; extracellular vesicle; perinuc…	organic cyclic compound binding; heterocyclic compound binding; RNA binding; peptidyl-prolyl cis-trans isomerase activity; isomerase activity; catalytic activity; binding; macromolecular complex binding; nucleic acid binding; protein binding; unfolded protein binding; RNA polymerase binding; cis-trans isomerase activity; enzyme binding; protein complex binding;	K03768			IPR002130; IPR029000;	Cyclophilin-type peptidyl-prolyl cis-trans isomerase domain; Cyclophilin-like domain;	O	KOG0880	Peptidyl-prolyl cis-trans isomerase
Q969Z0	FAST kinase domain-containing protein 4 OS=Homo sapiens OX=9606 GN=TBRG4 PE=1 SV=1	1.518	Up	0.0025829	TBRG4	70.737	0.682	0.9	0.843	0.766	0.622	0.813	0.888	0.793	0.941	1.493	1.052	1.333	0.87	1.906	1.029	0.948	mitochondria	regulation of cellular process; phosphorylation; negative regulation of cell cycle; regulation of cell proliferation; cellular protein metabolic process; single-organism process; negative regulation of biological process; negative regulation of cellular process; cellular metabolic process; phosphate-containing compound metabolic process; organic substance metabolic process; metabolic process; gen…	organelle; intracellular membrane-bounded organelle; intracellular organelle; cell part; intracellular; cytoplasm; intracellular part; membrane-bounded organelle; cell; mitochondrion; cytoplasmic part;	organic cyclic compound binding; heterocyclic compound binding; RNA binding; kinase activity; phosphotransferase activity, alcohol group as acceptor; catalytic activity; binding; nucleic acid binding; protein binding; protein kinase activity; transferase activity; transferase activity, transferring phosphorus-containing groups;				IPR013584; IPR013579; IPR010622;	RAP domain; FAST kinase-like protein, subdomain 2; FAST kinase leucine-rich;
P49756	RNA-binding protein 25 OS=Homo sapiens OX=9606 GN=RBM25 PE=1 SV=3	1.501	Up	0.00034455	RBM25	100.18	0.829	0.76	0.62	0.694	0.852	0.909	0.878	0.747	1.252	1.746	0.969	1.009	0.982	1.316	1.093	1.07	cytoplasm	regulation of cellular process; regulation of cell death; regulation of alternative mRNA splicing, via spliceosome; cellular aromatic compound metabolic process; regulation of macromolecule metabolic process; regulation of nucleobase-containing compound metabolic process; regulation of programmed cell death; cellular metabolic process; organic substance metabolic process; metabolic process; heter…	intracellular organelle; cytoplasm; intracellular organelle part; macromolecular complex; nuclear lumen; intracellular part; spliceosomal complex; nuclear body; cell; organelle part; intracellular membrane-bounded organelle; organelle; membrane-enclosed lumen; nucleus; nucleoplasm; intracellular organelle lumen; nuclear speck; intracellular; cell part; ribonucleoprotein complex; intracellular rib…	organic cyclic compound binding; heterocyclic compound binding; mRNA binding; RNA binding; nucleoside phosphate binding; binding; nucleic acid binding; protein binding; nucleotide binding; small molecule binding;				IPR034268; IPR000504; IPR012677; IPR002483;	RBM25, RNA recognition motif; RNA recognition motif domain; Nucleotide-binding alpha-beta plait domain; PWI domain;	A	KOG2253	U1 snRNP complex, subunit SNU71 and related PWI-motif proteins
P51911	Calponin-1 OS=Homo sapiens OX=9606 GN=CNN1 PE=1 SV=2	0.283	Down	5.9957e-05	CNN1	33.17	0.817	1.057	2.898	1.351	2.297	1.672	1.028	2.798	0.401	0.392	0.941	0.597	0.511	0.374	0.26	0.459	cytoplasm	regulation of cellular process; actomyosin structure organization; cellular component organization; regulation of cell proliferation; regulation of smooth muscle cell proliferation; regulation of muscle contraction; single-organism cellular process; single-organism process; negative regulation of biological process; negative regulation of cellular process; regulation of muscle system process; reg…	cytoskeleton; organelle; intracellular organelle; focal adhesion; intracellular non-membrane-bounded organelle; cell junction; cell part; intracellular; adherens junction; anchoring junction; cell-substrate junction; intracellular part; cell; cell-substrate adherens junction; non-membrane-bounded organelle;	actin binding; protein binding; cytoskeletal protein binding; calmodulin binding; binding;				IPR001715;	Calponin homology domain;	Z	KOG2046	Calponin
Q9BYG3	MKI67 FHA domain-interacting nucleolar phosphoprotein OS=Homo sapiens OX=9606 GN=NIFK PE=1 SV=1	1.664	Up	0.0030012	NIFK	34.222	0.571	0.732	0.565	0.733	0.81	0.793	0.851	0.723	0.836	2.299	0.965	0.951	0.995	1.394	0.9	1.272	nucleus	cellular component biogenesis; nucleic acid-templated transcription; biosynthetic process; negative regulation of phosphatase activity; cellular metabolic process; metabolic process; cellular component assembly; macromolecular complex assembly; regulation of dephosphorylation; macromolecule metabolic process; rRNA transcription; rRNA metabolic process; negative regulation of dephosphorylation; he…	intracellular organelle; intracellular non-membrane-bounded organelle; cytoplasm; intracellular organelle part; nuclear lumen; intracellular part; nucleolus; cell; organelle part; non-membrane-bounded organelle; condensed chromosome; organelle; intracellular membrane-bounded organelle; membrane-enclosed lumen; nucleoplasm; nucleus; intracellular organelle lumen; cell part; intracellular; chromoso…	organic cyclic compound binding; heterocyclic compound binding; RNA binding; nucleoside phosphate binding; binding; nucleic acid binding; protein binding; nucleotide binding; small molecule binding;	K14838			IPR000504; IPR021043; IPR012677;	RNA recognition motif domain; MKI67 FHA domain-interacting nucleolar phosphoprotein, FHA Ki67 binding; Nucleotide-binding alpha-beta plait domain;	R	KOG4208	Nucleolar RNA-binding protein NIFK
O75953	DnaJ homolog subfamily B member 5 OS=Homo sapiens OX=9606 GN=DNAJB5 PE=1 SV=1	0.428	Down	0.00134167	DNAJB5	39.133	1.147	1.327	1.322	1.196	2.2	1.412	1.17	2.698	0.311	0.9	1.25	0.909	0.428	0.675	0.228	0.634	cytoplasm	regulation of cellular process; regulation of macromolecule metabolic process; regulation of nucleobase-containing compound metabolic process; negative regulation of biological process; negative regulation of cellular process; negative regulation of cellular metabolic process; response to stimulus; negative regulation of RNA metabolic process; protein folding; negative regulation of transcription…	organelle; intracellular membrane-bounded organelle; intracellular organelle; nucleus; cell part; intracellular; cytoplasm; intracellular part; cytosol; membrane-bounded organelle; cell; cytoplasmic part;	protein binding; unfolded protein binding; chaperone binding; binding;	K09511			IPR008971; IPR002939; IPR001623;	HSP40/DnaJ peptide-binding; Chaperone DnaJ, C-terminal; DnaJ domain;	O	KOG0714	Molecular chaperone (DnaJ superfamily)
Q14320	Protein FAM50A OS=Homo sapiens OX=9606 GN=FAM50A PE=1 SV=2	1.509	Up	0.023458	FAM50A	40.241	0.807	0.854	0.609	0.652	0.987	0.816	0.754	0.82	1.009	2.048	0.844	0.946	1.802	1.062	0.8	0.997	nucleus	reproduction; multicellular organism reproduction; male gamete generation; reproductive process; spermatogenesis; single organism reproductive process; multi-organism reproductive process; sexual reproduction; single-organism process; multicellular organismal reproductive process; multicellular organismal process; gamete generation; multi-organism process;	organelle; intracellular membrane-bounded organelle; intracellular organelle; nucleus; cell part; intracellular; intracellular part; membrane-bounded organelle; cell;	organic cyclic compound binding; heterocyclic compound binding; RNA binding; binding; nucleic acid binding;	K13119					S	KOG2894	Uncharacterized conserved protein XAP-5
Q9H7L9	Sin3 histone deacetylase corepressor complex component SDS3 OS=Homo sapiens OX=9606 GN=SUDS3 PE=1 SV=2	1.697	Up	0.0074783	SUDS3	38.136	0.577	0.726	0.442	0.554	1.016	0.887	0.76	0.801	1.184	2.36	0.702	1.051	1.245	1.071	0.834	1.33	nucleus	protein modification by small protein removal; regulation of cell death; nucleic acid-templated transcription; brain development; single-organism process; biosynthetic process; cellular metabolic process; negative regulation of RNA metabolic process; neural nucleus development; substantia nigra development; regulation of RNA biosynthetic process; metabolic process; apoptotic process; head develop…	cytoplasm; macromolecular complex; intracellular part; nuclear body; cell; histone deacetylase complex; organelle part; chromosomal part; non-membrane-bounded organelle; membrane-enclosed lumen; catalytic complex; nucleoplasm; intracellular organelle lumen; Sin3 complex; nuclear chromosome part; cell part; intracellular; chromosome; nuclear chromatin; membrane-bounded organelle; nucleoplasm part;…	histone deacetylase activity; histone deacetylase binding; protein deacetylase activity; catalytic activity; binding; protein binding; hydrolase activity; deacetylase activity; hydrolase activity, acting on carbon-nitrogen (but not peptide) bonds, in linear amides; enzyme binding; hydrolase activity, acting on carbon-nitrogen (but not peptide) bonds;	K19201					DK	KOG4466	Component of histone deacetylase complex (breast carcinoma metastasis suppressor 1 protein in human)
P41219	Peripherin OS=Homo sapiens OX=9606 GN=PRPH PE=1 SV=2	0.271	Down	3.8429e-09	PRPH	53.65	1.42	1.525	2.345	1.443	1.651	1.627	1.742	2.267	0.352	0.362	0.566	0.521	0.663	0.458	0.361	0.514	nucleus		intracellular organelle; membrane; polymeric cytoskeletal fiber; extracellular region part; intracellular non-membrane-bounded organelle; cytoskeletal part; intracellular organelle part; vesicle; type III intermediate filament; intracellular part; supramolecular fiber; cell; supramolecular complex; extracellular region; organelle part; supramolecular polymer; non-membrane-bounded organelle; cytos…	protein binding; structural molecule activity; binding;	K07607	PRPH; peripherin	hsa05014 Amyotrophic lateral sclerosis (ALS);	IPR006821;	Intermediate filament head, DNA-binding domain;	DY	KOG0977	Nuclear envelope protein lamin, intermediate filament superfamily
Q16647	Prostacyclin synthase OS=Homo sapiens OX=9606 GN=PTGIS PE=1 SV=1	0.556	Down	0.00060165	PTGIS	57.103	1.045	1.095	1.484	1.218	2.087	1.296	1.147	1.746	0.812	0.758	1.013	0.893	1.068	0.549	0.461	0.624	extracellular	single organism signaling; regulation of cell death; pyridine nucleotide metabolic process; regulation of nitric oxide biosynthetic process; reproductive process; positive regulation of peroxisome proliferator activated receptor signaling pathway; embryo implantation; regulation of peroxisome proliferator activated receptor signaling pathway; cellular lipid metabolic process; response to interleu…	membrane; nuclear outer membrane-endoplasmic reticulum membrane network; extracellular space; extracellular region part; endoplasmic reticulum; membrane microdomain; cell periphery; cytoplasm; intrinsic component of membrane; intracellular part; cell; organelle part; plasma membrane region; membrane part; intracellular; cell part; whole membrane; membrane region; membrane raft; membrane-bounded o…	iron ion binding; prostaglandin-I synthase activity; ion binding; oxidoreductase activity, acting on paired donors, with incorporation or reduction of molecular oxygen; protein binding; oxidoreductase activity; heterocyclic compound binding; organic cyclic compound binding; heme binding; isomerase activity; transition metal ion binding; catalytic activity; binding; metal ion binding; cation bindi…	K01831	PTGIS; prostacyclin synthase [EC:5.3.99.4]	hsa01100 Metabolic pathways; hsa00590 Arachidonic acid metabolism;			Q	KOG0684	Cytochrome P450
P30405	"""Peptidyl-prolyl cis-trans isomerase F, mitochondrial OS=Homo sapiens OX=9606 GN=PPIF PE=1 SV=1"""	1.616	Up	0.000159414	PPIF	22.04	0.861	0.826	0.753	0.869	0.759	0.669	0.669	0.674	1.568	0.93	1.11	1.138	1.214	1.136	0.939	1.792	mitochondria	regulation of biological quality; regulation of cell death; negative regulation of nucleotide metabolic process; negative regulation of release of cytochrome c from mitochondria; response to arsenic-containing substance; cellular metabolic process; regulation of oxidative phosphorylation; regulation of mitochondrion organization; negative regulation of nucleoside metabolic process; metabolic proc…	mitochondrial matrix; intracellular organelle; membrane; mitochondrial part; organelle membrane; organelle envelope; intracellular organelle part; cytoplasm; intracellular part; cell; organelle part; mitochondrion; membrane-enclosed lumen; mitochondrial envelope; intracellular membrane-bounded organelle; organelle; intracellular organelle lumen; cell part; intracellular; envelope; organelle inner…	peptidyl-prolyl cis-trans isomerase activity; isomerase activity; catalytic activity; peptide binding; binding; protein binding; drug binding; amide binding; cyclosporin A binding; cis-trans isomerase activity;	K09565	PPIF; peptidyl-prolyl isomerase F (cyclophilin D) [EC:5.2.1.8]	hsa05016 Huntington's disease; hsa04022 cGMP-PKG signaling pathway; hsa04020 Calcium signaling pathway; hsa05145 Toxoplasmosis; hsa05012 Parkinson's disease;	IPR002130; IPR029000;	Cyclophilin-type peptidyl-prolyl cis-trans isomerase domain; Cyclophilin-like domain;	O	KOG0865	Cyclophilin type peptidyl-prolyl cis-trans isomerase
P49736	DNA replication licensing factor MCM2 OS=Homo sapiens OX=9606 GN=MCM2 PE=1 SV=4	1.987	Up	0.000157839	MCM2	101.89	0.553	0.595	0.626	0.717	0.583	0.681	0.635	0.644	1.19	1.883	1.131	1.08	1.074	1.556	0.776	1.312	nucleus	cellular component biogenesis; DNA unwinding involved in DNA replication; DNA geometric change; single-organism process; biosynthetic process; cellular response to cytokine stimulus; cellular metabolic process; metabolic process; nucleosome assembly; cellular component assembly; macromolecular complex assembly; apoptotic process; cell cycle phase transition; macromolecule metabolic process; DNA-d…	nuclear chromosome, telomeric region; chromosome, telomeric region; cytoplasm; macromolecular complex; intracellular part; MCM complex; cell; organelle part; chromosomal part; non-membrane-bounded organelle; cytoskeleton; membrane-enclosed lumen; nucleoplasm; intracellular organelle lumen; microtubule cytoskeleton; nuclear chromosome part; intracellular; cell part; chromosome; origin recognition …	nucleoside phosphate binding; double-stranded DNA binding; hydrolase activity, acting on acid anhydrides; hydrolase activity; protein binding; heterocyclic compound binding; organic cyclic compound binding; pyrophosphatase activity; catalytic activity; ribonucleotide binding; binding; purine ribonucleoside binding; cation binding; anion binding; adenyl ribonucleotide binding; adenyl nucleotide bi…	K02540	MCM2; DNA replication licensing factor MCM2 [EC:3.6.4.12]	hsa04110 Cell cycle; hsa03030 DNA replication;	IPR012340; IPR001208; IPR033762; IPR027417; IPR027925;	Nucleic acid-binding, OB-fold; MCM domain; MCM OB domain; P-loop containing nucleoside triphosphate hydrolase; MCM N-terminal domain;	L	KOG0477	DNA replication licensing factor, MCM2 component
Q93045	Stathmin-2 OS=Homo sapiens OX=9606 GN=STMN2 PE=1 SV=3	1.765	Up	0.033183	STMN2	20.828	0.567	0.57	0.511	0.46	0.788	0.907	0.845	0.963	0.902	2.93	0.679	0.837	1.392	1.549	0.939	0.676	cytoplasm	negative regulation of developmental process; positive regulation of neuron differentiation; negative regulation of microtubule polymerization or depolymerization; positive regulation of protein complex disassembly; cellular developmental process; negative regulation of cellular component organization; neurogenesis; single-organism process; negative regulation of multicellular organismal process;…	intracellular vesicle; intracellular organelle; cell leading edge; membrane; cell projection; cytoplasmic vesicle; cytoplasm; vesicle; neuronal cell body; endomembrane system; growth cone; intracellular part; cell projection part; site of polarized growth; cell; intracellular membrane-bounded organelle; axon; organelle; somatodendritic compartment; cell part; intracellular; lamellipodium; perinuc…	tubulin binding; protein binding; cytoskeletal protein binding; calcium-dependent protein binding; binding;
O75015	Low affinity immunoglobulin gamma Fc region receptor III-B OS=Homo sapiens OX=9606 GN=FCGR3B PE=1 SV=2	2.25	Up	0.0032845	FCGR3B	26.216	0.432	1.139	0.372	0.444	1.247	0.411	0.411	0.273	0.938	2.161	0.856	1.297	2.168	0.662	0.994	1.563	extracellular	post-translational protein modification; leukocyte activation; neutrophil activation involved in immune response; immune effector process; cellular protein metabolic process; single-organism process; biosynthetic process; response to stimulus; cellular metabolic process; lipoprotein metabolic process; establishment of localization; organic substance metabolic process; metabolic process; myeloid c…	membrane; extracellular region part; organelle membrane; cytoplasmic vesicle; cell periphery; cytoplasm; vesicle; cytoplasmic vesicle part; intrinsic component of membrane; intracellular part; cell; organelle part; extracellular exosome; membrane part; intracellular; cell part; whole membrane; secretory vesicle; extracellular vesicle; secretory granule; membrane-bounded organelle; intracellular v…	protein binding; immunoglobulin binding; binding; IgG binding; protein complex binding; macromolecular complex binding;	K06463	FCGR3; low affinity immunoglobulin gamma Fc receptor III	hsa05322 Systemic lupus erythematosus; hsa04666 Fc gamma R-mediated phagocytosis; hsa04380 Osteoclast differentiation; hsa05152 Tuberculosis; hsa05150 Staphylococcus aureus infection; hsa04650 Natural killer cell mediated cytotoxicity; hsa05140 Leishmaniasis; hsa04145 Phagosome;	IPR007110; IPR013783; IPR003599;	Immunoglobulin-like domain; Immunoglobulin-like fold; Immunoglobulin subtype;
O00116	"""Alkyldihydroxyacetonephosphate synthase, peroxisomal OS=Homo sapiens OX=9606 GN=AGPS PE=1 SV=1"""	1.534	Up	0.0036361	AGPS	72.911	0.705	0.839	0.636	0.807	0.773	0.857	0.739	0.896	0.858	1.855	0.98	0.961	1.286	0.926	1.237	1.486	cytoplasm	ether lipid biosynthetic process; single-organism biosynthetic process; oxidation-reduction process; small molecule metabolic process; glycerol ether biosynthetic process; single-organism cellular process; ether lipid metabolic process; single-organism process; ether metabolic process; cellular lipid metabolic process; biosynthetic process; primary metabolic process; cellular metabolic process; o…	membrane; organelle membrane; cytoplasm; microbody part; intracellular part; cell; organelle part; peroxisomal membrane; non-membrane-bounded organelle; membrane-enclosed lumen; intracellular organelle lumen; peroxisomal matrix; intracellular; cell part; whole membrane; microbody; membrane-bounded organelle; organelle lumen; intracellular organelle; microbody membrane; peroxisomal part; bounding …	nucleoside phosphate binding; flavin adenine dinucleotide binding; ion binding; protein binding; nucleotide binding; cofactor binding; oxidoreductase activity; FAD binding; oxidoreductase activity, acting on CH-OH group of donors; heterocyclic compound binding; organic cyclic compound binding; alkylglycerone-phosphate synthase activity; catalytic activity; binding; transferase activity, transferr…	K00803	AGPS; alkyldihydroxyacetonephosphate synthase [EC:2.5.1.26]	hsa01100 Metabolic pathways; hsa00565 Ether lipid metabolism; hsa04146 Peroxisome;	IPR016166; IPR004113; IPR016169; IPR016164; IPR016167; IPR006094;	FAD-binding, type 2; FAD-linked oxidase, C-terminal; CO dehydrogenase flavoprotein-like, FAD-binding, subdomain 2; FAD-linked oxidase-like, C-terminal; FAD-binding, type 2, subdomain 1; FAD linked oxidase, N-terminal;	R	KOG1233	Alkyl-dihydroxyacetonephosphate synthase
Q2NL82	Pre-rRNA-processing protein TSR1 homolog OS=Homo sapiens OX=9606 GN=TSR1 PE=1 SV=1	1.601	Up	0.00094393	TSR1	91.809	0.654	0.667	0.627	0.724	0.974	0.74	0.784	0.841	1.364	1.928	0.887	0.971	1.123	1.339	0.863	1.15	nucleus	cellular component biogenesis; cellular component organization; ribonucleoprotein complex biogenesis; ribonucleoprotein complex assembly; cellular aromatic compound metabolic process; endonucleolytic cleavage of tricistronic rRNA transcript (SSU-rRNA, 5.8S rRNA, LSU-rRNA); cellular metabolic process; organic substance metabolic process; maturation of SSU-rRNA from tricistronic rRNA transcript (SS…	intracellular organelle; intracellular non-membrane-bounded organelle; cytoplasm; intracellular organelle part; macromolecular complex; nuclear lumen; intracellular part; nucleolus; cytosol; cell; preribosome, small subunit precursor; organelle part; preribosome; non-membrane-bounded organelle; organelle; intracellular membrane-bounded organelle; membrane-enclosed lumen; nucleoplasm; nucleus; int…	nucleoside phosphate binding; hydrolase activity, acting on acid anhydrides; hydrolase activity; heterocyclic compound binding; organic cyclic compound binding; U3 snoRNA binding; pyrophosphatase activity; ribonucleotide binding; catalytic activity; binding; purine ribonucleoside binding; GTPase activity; anion binding; guanyl nucleotide binding; hydrolase activity, acting on acid anhydrides, in …	K14799			IPR030387; IPR012948; IPR007034;	Bms1/Tsr1-type G domain; AARP2CN; Ribosome biogenesis protein BMS1/TSR1, C-terminal;	S	KOG1980	Uncharacterized conserved protein
Q86SQ7	Serologically defined colon cancer antigen 8 OS=Homo sapiens OX=9606 GN=SDCCAG8 PE=1 SV=1	0.632	Down	0.036378	SDCCAG8	82.681	1.378	1.033	1.81	0.978					0.977	0.664	0.804	0.84					nucleus	cellular component biogenesis; cell migration; cellular component organization; single-multicellular organism process; localization of cell; tube formation; cellular developmental process; centrosome organization; neurogenesis; cilium assembly; single-organism process; ciliary basal body docking; mitotic cell cycle process; membrane docking; cilium organization; anatomical structure morphogenesis…	intracellular organelle; microtubule organizing center part; intracellular non-membrane-bounded organelle; cytoskeletal part; cell junction; centriolar satellite; intracellular organelle part; cytoplasm; intracellular part; cytosol; cell-cell junction; cell; organelle part; non-membrane-bounded organelle; organelle; cytoskeleton; microtubule organizing center; microtubule cytoskeleton; intracellu…	protein binding; binding;	K16488
Q5TA45	Integrator complex subunit 11 OS=Homo sapiens OX=9606 GN=INTS11 PE=1 SV=2	1.603	Up	4.2854e-05	INTS11	67.662	0.788	0.845	0.722	0.809	0.684	0.741	0.751	0.72	1.122	1.656	0.982	1.051	1.117	1.283	1.156	1.346	cytoplasm	snRNA transcription from RNA polymerase II promoter; cellular aromatic compound metabolic process; nucleic acid-templated transcription; biosynthetic process; cellular metabolic process; organic substance metabolic process; metabolic process; snRNA processing; heterocycle metabolic process; aromatic compound biosynthetic process; nucleobase-containing compound metabolic process; ncRNA transcripti…	extracellular region part; extracellular space; transferase complex, transferring phosphorus-containing groups; cytoplasm; macromolecular complex; intracellular part; cell; organelle part; membrane-enclosed lumen; catalytic complex; nucleoplasm; intracellular organelle lumen; intracellular; cell part; membrane-bounded organelle; nucleoplasm part; integrator complex; organelle lumen; intracellular…	hydrolase activity; catalytic activity;	K13148			IPR011108; IPR022712; IPR001279;	Zn-dependent metallo-hydrolase, RNA specificity domain; Beta-Casp domain; Metallo-beta-lactamase;	A	KOG1136	Predicted cleavage and polyadenylation specificity factor (CPSF subunit)
Q15287	RNA-binding protein with serine-rich domain 1 OS=Homo sapiens OX=9606 GN=RNPS1 PE=1 SV=1	1.702	Up	0.030303	RNPS1	34.208	1.057	0.892	0.413	0.346	0.735	0.76	0.779	0.763	1.568	2.13	0.455	0.856	1.256	1.332	1.045	1.138	nucleus	RNA transport; regulation of cell death; regulation of alternative mRNA splicing, via spliceosome; nucleic acid-templated transcription; negative regulation of mRNA processing; biosynthetic process; nuclear export; nuclear transport; negative regulation of RNA metabolic process; negative regulation of mRNA metabolic process; cellular metabolic process; protein transport; establishment of localiza…	intracellular organelle; intracellular organelle part; cytoplasm; macromolecular complex; nuclear lumen; intracellular part; nuclear body; cell; cytosol; organelle part; intracellular membrane-bounded organelle; organelle; membrane-enclosed lumen; nucleoplasm; nucleus; intracellular organelle lumen; nuclear speck; ASAP complex; intracellular; cell part; protein complex; membrane-bounded organelle…	organic cyclic compound binding; heterocyclic compound binding; mRNA binding; RNA binding; nucleoside phosphate binding; mRNA 3'-UTR binding; binding; nucleic acid binding; protein binding; nucleotide binding; small molecule binding;	K14325	RNPS1; RNA-binding protein with serine-rich domain 1	hsa03015 mRNA surveillance pathway; hsa03013 RNA transport;	IPR034201; IPR000504; IPR012677;	RNPS1, RNA recognition motif; RNA recognition motif domain; Nucleotide-binding alpha-beta plait domain;	A	KOG4209	Splicing factor RNPS1, SR protein superfamily
Q96A26	Protein FAM162A OS=Homo sapiens OX=9606 GN=FAM162A PE=1 SV=2	0.66	Down	0.00048273	FAM162A	17.342	1.381	1.25	1.262	1.162	0.916	1.376	1.372	1.628	0.881	0.896	1.034	0.63	0.631	1.04	0.966	0.754	plasma membrane	regulation of cell death; positive regulation of cellular protein metabolic process; regulation of release of cytochrome c from mitochondria; neuron death; regulation of signaling; single-organism process; regulation of mitochondrion organization; positive regulation of cellular component organization; regulation of apoptotic signaling pathway; regulation of cell communication; positive regulatio…	intracellular organelle; membrane; extracellular region part; cytoplasm; vesicle; intrinsic component of membrane; intracellular part; cell; cytosol; integral component of membrane; extracellular region; mitochondrion; intracellular membrane-bounded organelle; organelle; extracellular exosome; membrane part; intracellular; cell part; extracellular vesicle; membrane-bounded organelle; extracellula…	protein binding; binding;
P11678	Eosinophil peroxidase OS=Homo sapiens OX=9606 GN=EPX PE=1 SV=2	1.695	Up	0.049942	EPX	81.04	1.365	0.91	0.652	0.509	0.342	0.928	0.321	0.696	1.872	1.056	1.017	0.8	0.737	0.696	0.886	2.634	extracellular	leukocyte activation; localization of cell; defense response to other organism; single-organism process; negative regulation of multicellular organismal process; negative regulation of cytokine production; cellular metabolic process; positive regulation of interleukin-4 production; response to biotic stimulus; establishment of localization; response to external stimulus; metabolic process; regula…	secretory granule lumen; intracellular organelle; intracellular vesicle; extracellular space; extracellular region part; cytoplasmic vesicle; vesicle; cytoplasm; intracellular organelle part; cytoplasmic vesicle part; endomembrane system; intracellular part; cell; extracellular region; organelle part; extracellular exosome; membrane-enclosed lumen; organelle; vesicle lumen; intracellular organell…	organic cyclic compound binding; heterocyclic compound binding; heme binding; catalytic activity; binding; ion binding; antioxidant activity; metal ion binding; cation binding; peroxidase activity; tetrapyrrole binding; oxidoreductase activity, acting on peroxide as acceptor; oxidoreductase activity;	K10788	EPX; eosinophil peroxidase [EC:1.11.1.7]	hsa05310 Asthma;			R	KOG2408	Peroxidase/oxygenase
P48634	Protein PRRC2A OS=Homo sapiens OX=9606 GN=PRRC2A PE=1 SV=3	1.56	Up	0.0021833	PRRC2A	228.86	0.84	0.667	0.703	0.715	0.83	0.82	0.744	0.817	1.107	1.849	0.878	1.087	1.123	1.558	0.957	1.016	nucleus	developmental process; cell differentiation; single-organism developmental process; cellular developmental process; single-organism cellular process; single-organism process; cellular process;	intracellular organelle; membrane; extracellular region part; cytoplasm; vesicle; intracellular part; cell; extracellular region; organelle; extracellular exosome; intracellular membrane-bounded organelle; nucleus; intracellular; cell part; extracellular vesicle; membrane-bounded organelle; extracellular organelle;	organic cyclic compound binding; heterocyclic compound binding; RNA binding; protein binding; binding; nucleic acid binding;				IPR009738;	BAT2, N-terminal;	X	KOG4817	Unnamed protein
Q9NUW8	Tyrosyl-DNA phosphodiesterase 1 OS=Homo sapiens OX=9606 GN=TDP1 PE=1 SV=2	1.797	Up	0.00026211	TDP1	68.42	0.834	0.788	0.764	0.555	0.622	0.814	0.526	0.626	1.371	1.792	0.762	0.998	1.191	1.395	0.949	1.48	nucleus	cellular response to stress; cellular response to stimulus; cellular aromatic compound metabolic process; response to stress; DNA metabolic process; double-strand break repair; organic cyclic compound metabolic process; nitrogen compound metabolic process; single strand break repair; primary metabolic process; response to stimulus; cellular metabolic process; cellular response to DNA damage stimu…	intracellular membrane-bounded organelle; organelle; intracellular organelle; membrane; nucleus; cell periphery; cell part; intracellular; cytoplasm; intracellular part; membrane-bounded organelle; cell; plasma membrane;	DNA binding; double-stranded DNA binding; single-stranded DNA binding; protein binding; hydrolase activity; 3'-tyrosyl-DNA phosphodiesterase activity; heterocyclic compound binding; organic cyclic compound binding; tyrosyl-DNA phosphodiesterase activity; catalytic activity; phosphoric ester hydrolase activity; binding; nuclease activity; nucleic acid binding; hydrolase activity, acting on ester b…	K10862			IPR027415;	Tyrosyl-DNA phosphodiesterase C-terminal domain;	L	KOG2031	Tyrosyl-DNA phosphodiesterase
Q02318	"""Sterol 26-hydroxylase, mitochondrial OS=Homo sapiens OX=9606 GN=CYP27A1 PE=1 SV=1"""	0.608	Down	0.00095875	CYP27A1	60.234	1.371	1.483	1.238	1.149					0.763	0.751	0.725	0.949					mitochondria	organic acid biosynthetic process; organic hydroxy compound metabolic process; single-organism process; biosynthetic process; cellular metabolic process; sterol metabolic process; lipid biosynthetic process; organic substance metabolic process; metabolic process; monocarboxylic acid metabolic process; cellular process; bile acid metabolic process; lipid metabolic process; single-organism biosynth…	mitochondrial matrix; intracellular organelle; membrane; mitochondrial part; organelle membrane; organelle envelope; cytoplasm; intracellular organelle part; intracellular part; cell; mitochondrion; organelle part; mitochondrial envelope; membrane-enclosed lumen; organelle; intracellular membrane-bounded organelle; intracellular organelle lumen; cell part; intracellular; envelope; organelle inner…	iron ion binding; ion binding; oxidoreductase activity, acting on paired donors, with incorporation or reduction of molecular oxygen; oxidoreductase activity; steroid hydroxylase activity; heterocyclic compound binding; organic cyclic compound binding; heme binding; transition metal ion binding; catalytic activity; binding; metal ion binding; cation binding; tetrapyrrole binding; monooxygenase ac…	K00488	CYP27A; cholestanetriol 26-monooxygenase [EC:1.14.15.15]	hsa00120 Primary bile acid biosynthesis; hsa03320 PPAR signaling pathway; hsa01100 Metabolic pathways;			Q	KOG0159	Cytochrome P450 CYP11/CYP12/CYP24/CYP27 subfamilies
P02647	Apolipoprotein A-I OS=Homo sapiens OX=9606 GN=APOA1 PE=1 SV=1	0.621	Down	2.3156e-05	APOA1	30.777	1.45	1.345	1.13	1.276	1.644	1.365	0.962	1.348	1.022	0.676	0.675	0.805	0.853	0.725	0.904	0.877	extracellular	cellular component biogenesis; single organism signaling; tissue migration; gland development; regulation of sterol transport; alcohol metabolic process; positive regulation of biosynthetic process; negative regulation of immune effector process; cellular lipid metabolic process; triglyceride homeostasis; negative regulation of interleukin-1 secretion; regulation of defense response; cellular met…	secretory granule lumen; membrane; endoplasmic reticulum; extracellular region part; extracellular space; cytoplasmic vesicle; cell periphery; cytoplasm; vesicle; plasma lipoprotein particle; cytoplasmic vesicle part; triglyceride-rich plasma lipoprotein particle; macromolecular complex; intracellular part; cell; very-low-density lipoprotein particle; organelle part; early endosome; discoidal hig…	sterol binding; ammonium ion binding; receptor binding; apolipoprotein A-I receptor binding; lipid transporter activity; substrate-specific transporter activity; protein binding; enzyme inhibitor activity; molecular function regulator; steroid binding; organic cyclic compound binding; phosphatidylcholine binding; quaternary ammonium group binding; identical protein binding; peptide binding; high-…	K08757	APOA1; apolipoprotein A-I	hsa04975 Fat digestion and absorption; hsa03320 PPAR signaling pathway; hsa04977 Vitamin digestion and absorption; hsa05143 African trypanosomiasis;
Q9UBI6	Guanine nucleotide-binding protein G(I)/G(S)/G(O) subunit gamma-12 OS=Homo sapiens OX=9606 GN=GNG12 PE=1 SV=3	0.655	Down	0.0036968	GNG12	8.0061	1.157	1.057	1.282	1.259	1.487	1.148	1.168	1.708	0.768	0.825	1.043	0.894	1.063	0.802	0.959	0.375	nucleus	pallium development; regulation of cellular process; single organism signaling; single-multicellular organism process; brain development; cellular response to organic substance; response to oxygen-containing compound; single-organism process; cerebral cortex development; response to external biotic stimulus; response to stimulus; response to other organism; response to biotic stimulus; telencepha…	membrane; extracellular region part; extrinsic component of membrane; cell periphery; membrane protein complex; vesicle; macromolecular complex; supramolecular fiber; intracellular part; supramolecular complex; cell; extrinsic component of cytoplasmic side of plasma membrane; cytoplasmic side of plasma membrane; cytoplasmic side of membrane; organelle part; non-membrane-bounded organelle; cytoske…	binding; ion binding; phosphate ion binding; anion binding; protein binding; protein domain specific binding; PDZ domain binding; signal transducer activity;	K04347	GNG12; guanine nucleotide-binding protein G(I)/G(S)/G(O) subunit gamma-12	hsa05200 Pathways in cancer; hsa04728 Dopaminergic synapse; hsa04723 Retrograde endocannabinoid signaling; hsa04727 GABAergic synapse; hsa04014 Ras signaling pathway; hsa04810 Regulation of actin cytoskeleton; hsa04151 PI3K-Akt signaling pathway; hsa04010 MAPK signaling pathway; hsa05034 Alcoholism; hsa04726 Serotonergic synapse; hsa04713 Circadian entrainment; hsa04724 Glutamatergic synapse; hsa…	IPR015898;	G-protein gamma-like domain;	T	KOG4119	G protein gamma subunit
P51784	Ubiquitin carboxyl-terminal hydrolase 11 OS=Homo sapiens OX=9606 GN=USP11 PE=1 SV=3	1.59	Up	0.0136402	USP11	109.82					0.965	0.618	0.723	0.785					1.024	1.351	1.506	1.034	mitochondria	modification-dependent macromolecule catabolic process; protein modification by small protein removal; cellular macromolecule catabolic process; proteolysis involved in cellular protein catabolic process; cellular protein catabolic process; modification-dependent protein catabolic process; cellular protein metabolic process; ubiquitin-dependent protein catabolic process; protein modification by s…	intracellular organelle; intracellular non-membrane-bounded organelle; cytoplasm; intracellular organelle part; nuclear lumen; intracellular part; cytosol; cell; organelle part; non-membrane-bounded organelle; organelle; intracellular membrane-bounded organelle; membrane-enclosed lumen; nucleoplasm; nucleus; intracellular organelle lumen; cell part; intracellular; chromosome; membrane-bounded org…	endopeptidase activity; thiol-dependent ubiquitin-specific protease activity; peptidase activity; thiol-dependent ubiquitinyl hydrolase activity; catalytic activity; binding; ubiquitinyl hydrolase activity; peptidase activity, acting on L-amino acid peptides; ubiquitin-like protein-specific protease activity; protein binding; cysteine-type peptidase activity; hydrolase activity; cysteine-type end…	K11835			IPR028135; IPR006615; IPR028889; IPR001394; IPR029346;	Ubiquitin-like domain, USP-type; Peptidase C19, ubiquitin-specific peptidase, DUSP domain; Ubiquitin specific protease domain; Peptidase C19, ubiquitin carboxyl-terminal hydrolase; Ubiquitin carboxyl-terminal hydrolase, C-terminal;	O	KOG1870	Ubiquitin C-terminal hydrolase
P21128	Poly(U)-specific endoribonuclease OS=Homo sapiens OX=9606 GN=ENDOU PE=1 SV=2	0.366	Down	0.000101508	ENDOU	46.872	1.514	1.623	1.596	1.241	1.103	1.525	1.854	2.829	0.412	0.351	1.211	0.649	0.305	0.362	0.886	0.682	extracellular	reproduction; cellular aromatic compound metabolic process; reproductive process; response to stimulus; cellular metabolic process; establishment of localization; organic substance metabolic process; female pregnancy; metabolic process; heterocycle metabolic process; nucleobase-containing compound metabolic process; multi-multicellular organism process; cellular nitrogen compound metabolic proces…	membrane; extracellular space; extracellular region part; cell periphery; cell part; intracellular; cytoplasm; intracellular part; cell; extracellular region; plasma membrane;	RNA binding; growth factor activity; peptidase activity; receptor binding; ion binding; serine-type peptidase activity; endoribonuclease activity; cargo receptor activity; scavenger receptor activity; hydrolase activity; protein binding; manganese ion binding; heterocyclic compound binding; organic cyclic compound binding; molecular transducer activity; polysaccharide binding; receptor activity; …	K14648			IPR020436; IPR001212;	Somatomedin B, chordata; Somatomedin B domain;	R	KOG2849	Placental protein 11
Q13790	Apolipoprotein F OS=Homo sapiens OX=9606 GN=APOF PE=1 SV=2	0.656	Down	0.000141807	APOF	35.399	0.964	1.278	1.261	1.558	1.574	1.061	1.469	1.131	0.859	0.708	0.967	0.856	0.685	0.774	0.987	0.917	extracellular	cholesterol metabolic process; lipid transport; organic hydroxy compound metabolic process; secondary alcohol metabolic process; alcohol metabolic process; small molecule metabolic process; steroid metabolic process; single-organism process; organic cyclic compound metabolic process; organic substance transport; lipid localization; primary metabolic process; sterol metabolic process; organic subs…	extracellular region part; extracellular space; protein-lipid complex; low-density lipoprotein particle; lipoprotein particle; plasma lipoprotein particle; macromolecular complex; high-density lipoprotein particle; extracellular region;	organic cyclic compound binding; cholesterol binding; sterol binding; receptor binding; binding; alcohol binding; lipid transporter activity; lipid binding; substrate-specific transporter activity; protein binding; steroid binding; transporter activity; small molecule binding;
Q13573	SNW domain-containing protein 1 OS=Homo sapiens OX=9606 GN=SNW1 PE=1 SV=1	1.549	Up	0.00109589	SNW1	61.494	0.682	0.656	0.664	0.632	0.891	0.909	0.737	1.064	1.296	1.912	0.928	0.988	1.14	1.253	1.12	1.02	cytoplasm	cellular component biogenesis; single organism signaling; ribonucleoprotein complex biogenesis; regulation of biological quality; positive regulation of cellular protein metabolic process; ribonucleoprotein complex assembly; cell surface receptor signaling pathway; nucleic acid-templated transcription; positive regulation by host of viral transcription; positive regulation of biosynthetic process…	intracellular organelle; intracellular organelle part; macromolecular complex; nuclear lumen; intracellular part; spliceosomal complex; nuclear body; cell; post-mRNA release spliceosomal complex; organelle part; membrane-enclosed lumen; organelle; intracellular membrane-bounded organelle; catalytic complex; nucleus; nucleoplasm; intracellular organelle lumen; cell part; intracellular; nuclear mat…	vitamin D receptor binding; RNA binding; transcription corepressor activity; receptor binding; protein binding; hormone receptor binding; transcription cofactor activity; heterocyclic compound binding; organic cyclic compound binding; retinoic acid receptor binding; binding; nucleic acid binding; nuclear hormone receptor binding; transcription factor activity, transcription factor binding; transc…	K06063	SNW1; SNW domain-containing protein 1	hsa04330 Notch signaling pathway; hsa03040 Spliceosome; hsa05169 Epstein-Barr virus infection; hsa05203 Viral carcinogenesis;	IPR004015;	SKI-interacting protein SKIP, SNW domain;	AB	KOG2441	mRNA splicing factor/probable chromatin binding snw family nuclear protein
O60437	Periplakin OS=Homo sapiens OX=9606 GN=PPL PE=1 SV=4	0.444	Down	0.0019966	PPL	204.74	1.478	1.339	1.597	1.193	1.154	1.718	1.739	1.949	0.657	0.323	1.242	0.697	0.309	0.34	1.108	0.723	nucleus	developmental process; cellular component organization; single-multicellular organism process; epithelium development; skin development; keratinocyte differentiation; tissue development; keratinization; system development; cornification; cellular developmental process; single-organism cellular process; single-organism process; multicellular organismal process; epidermal cell differentiation; anim…	intracellular organelle; membrane; extracellular region part; intracellular non-membrane-bounded organelle; cell periphery; cell junction; vesicle; cytoplasm; anchoring junction; intracellular part; cell-cell junction; cell; cytosol; extracellular region; mitochondrion; plasma membrane; non-membrane-bounded organelle; desmosome; extracellular exosome; cytoskeleton; intracellular membrane-bounded …	cell adhesion molecule binding; protein binding; structural constituent of cytoskeleton; structural molecule activity; binding; cadherin binding;	K10386					Z	KOG0516	Dystonin, GAS (Growth-arrest-specific protein), and related proteins
Q9Y2W1	Thyroid hormone receptor-associated protein 3 OS=Homo sapiens OX=9606 GN=THRAP3 PE=1 SV=2	1.608	Up	0.00045613	THRAP3	108.66	0.811	0.713	0.753	0.744	0.669	0.818	0.801	0.68	1.15	1.766	0.999	0.969	1.317	1.397	1.02	1.01	nucleus	single organism signaling; regulation of biological quality; regulation of alternative mRNA splicing, via spliceosome; posttranscriptional regulation of gene expression; RNA stabilization; nucleic acid-templated transcription; positive regulation of biosynthetic process; cellular metabolic process; metabolic process; intracellular receptor signaling pathway; response to steroid hormone; response …	intracellular organelle; extracellular region part; intracellular organelle part; vesicle; macromolecular complex; nuclear lumen; intracellular part; nuclear body; cell; extracellular region; organelle part; membrane-enclosed lumen; organelle; extracellular exosome; intracellular membrane-bounded organelle; nucleus; nucleoplasm; intracellular organelle lumen; mediator complex; nuclear speck; intr…	thyroid hormone receptor binding; nucleoside phosphate binding; receptor binding; double-stranded DNA binding; protein binding; hormone receptor binding; core promoter binding; heterocyclic compound binding; regulatory region DNA binding; organic cyclic compound binding; core promoter sequence-specific DNA binding; ligand-dependent nuclear receptor transcription coactivator activity; ribonucleoti…	K13112
P23634	Plasma membrane calcium-transporting ATPase 4 OS=Homo sapiens OX=9606 GN=ATP2B4 PE=1 SV=2	0.647	Down	4.4501e-05	ATP2B4	137.92	1.087	1.137	1.321	1.3	1.64	1.216	1.146	1.476	0.792	0.675	1.01	1.085	0.86	0.747	0.764	0.749	plasma membrane	hippocampus development; reproductive process; regulation of cardiac muscle adaptation; neural retina development; regulation of cell cycle process; regulation of adrenergic receptor signaling pathway involved in heart process; regulation of protein serine/threonine kinase activity; regulation of muscle hypertrophy; positive regulation of molecular function; negative regulation of citrulline bios…	basolateral plasma membrane; membrane; membrane microdomain; cell periphery; myofibril; cytoplasm; macromolecular complex; intrinsic component of membrane; sperm flagellum; 9+2 motile cilium; intracellular part; supramolecular fiber; integral component of plasma membrane; Z disc; supramolecular complex; cell; I band; organelle part; non-membrane-bounded organelle; T-tubule; plasma membrane region…	ATPase coupled ion transmembrane transporter activity; protein phosphatase binding; nitric-oxide synthase binding; substrate-specific transmembrane transporter activity; organic cyclic compound binding; cation-transporting ATPase activity; ribonucleotide binding; catalytic activity; ATPase activity, coupled to movement of substances; binding; purine ribonucleoside binding; anion binding; adenyl r…	K05850	ATP2B; Ca2+ transporting ATPase, plasma membrane [EC:3.6.3.8]	hsa04024 cAMP signaling pathway; hsa04978 Mineral absorption; hsa04261 Adrenergic signaling in cardiomyocytes; hsa04972 Pancreatic secretion; hsa04970 Salivary secretion; hsa04961 Endocrine and other factor-regulated calcium reabsorption; hsa04022 cGMP-PKG signaling pathway; hsa04020 Calcium signaling pathway;	IPR004014; IPR023298; IPR022141; IPR023299; IPR008250; IPR023214; IPR006068;	Cation-transporting P-type ATPase, N-terminal; P-type ATPase, transmembrane domain; Plasma membrane calcium transporting P-type ATPase, C-terminal; P-type ATPase, cytoplasmic domain N; P-type ATPase, A domain; HAD-like domain; Cation-transporting P-type ATPase, C-terminal;	P	KOG0204	Calcium transporting ATPase
Q8TDB6	E3 ubiquitin-protein ligase DTX3L OS=Homo sapiens OX=9606 GN=DTX3L PE=1 SV=1	2.06	Up	0.00028247	DTX3L	83.553	0.665	0.713	0.604	0.776	0.49	0.59	0.49	0.669	1.07	1.794	0.631	1.402	1.155	1.997	1.288	0.955	nucleus	cellular response to stress; cellular component organization; cellular aromatic compound metabolic process; DNA metabolic process; histone modification; double-strand break repair; cellular protein metabolic process; response to stimulus; cellular metabolic process; protein polyubiquitination; organic substance metabolic process; metabolic process; heterocycle metabolic process; nucleobase-contai…	intracellular organelle; intracellular organelle part; cytoplasm; nuclear lumen; intracellular part; cell; cytosol; organelle part; intracellular membrane-bounded organelle; organelle; membrane-enclosed lumen; nucleoplasm; nucleus; intracellular organelle lumen; intracellular; cell part; membrane-bounded organelle; organelle lumen; cytoplasmic part; nuclear part;	histone binding; ubiquitin-like protein transferase activity; transition metal ion binding; catalytic activity; binding; ubiquitin-protein transferase activity; ion binding; metal ion binding; cation binding; protein binding; zinc ion binding; transferase activity;	K06058	DTX; deltex [EC:2.3.2.27]	hsa04330 Notch signaling pathway;	IPR001841; IPR013083;	Zinc finger, RING-type; Zinc finger, RING/FYVE/PHD-type;
Q9P287	BRCA2 and CDKN1A-interacting protein OS=Homo sapiens OX=9606 GN=BCCIP PE=1 SV=1	1.768	Up	0.004084	BCCIP	35.979	0.614	0.744	0.64	0.719	0.665	0.768	0.677	0.758	1.399	1.823	0.889	0.934	0.649	1.584	1.19	1.409	nucleus	regulation of protein kinase activity; regulation of cellular process; cellular response to stress; neuroendocrine cell differentiation; cellular aromatic compound metabolic process; regulation of macromolecule metabolic process; DNA metabolic process; regulation of protein modification process; cellular developmental process; single-organism process; regulation of cyclin-dependent protein kinase…	intracellular organelle; transferase complex, transferring phosphorus-containing groups; cytoplasm; intracellular organelle part; nuclear lumen; macromolecular complex; cyclin-dependent protein kinase holoenzyme complex; intracellular part; serine/threonine protein kinase complex; transferase complex; cytosol; cell; protein kinase complex; organelle part; membrane-enclosed lumen; intracellular me…	organic cyclic compound binding; heterocyclic compound binding; RNA binding; enzyme regulator activity; binding; nucleic acid binding; protein binding; kinase regulator activity; molecular function regulator;	K15262					R	KOG3034	Isoamyl acetate-hydrolyzing esterase and related enzymes
Q8WXF7	Atlastin-1 OS=Homo sapiens OX=9606 GN=ATL1 PE=1 SV=1	0.57	Down	0.0034388	ATL1	63.543	0.97	1.075	1.347	1.447	1.686	1.17	1.151	2.389	0.815	1.075	0.773	0.803	0.993	0.706	0.901	0.341	nucleus	cellular component biogenesis; single-multicellular organism process; cellular component organization; endomembrane system organization; protein homooligomerization; cellular developmental process; neuron development; single-organism process; cellular component morphogenesis; neurogenesis; cell development; cell morphogenesis involved in differentiation; protein oligomerization; anatomical struct…	membrane; nuclear outer membrane-endoplasmic reticulum membrane network; endoplasmic reticulum; organelle membrane; cytoplasm; intrinsic component of membrane; intracellular part; cell; organelle part; endoplasmic reticulum subcompartment; membrane part; cell part; intracellular; Golgi subcompartment; neuron projection; Golgi apparatus part; membrane-bounded organelle; neuron part; endoplasmic re…	nucleoside phosphate binding; nucleoside binding; ion binding; hydrolase activity, acting on acid anhydrides; hydrolase activity; protein binding; nucleotide binding; nucleoside-triphosphatase activity; heterocyclic compound binding; organic cyclic compound binding; ribonucleoside binding; carbohydrate derivative binding; identical protein binding; pyrophosphatase activity; ribonucleotide binding…	K17339			IPR015894; IPR027417; IPR030386; IPR003191;	Guanylate-binding protein, N-terminal; P-loop containing nucleoside triphosphate hydrolase; GB1/RHD3-type guanine nucleotide-binding (G) domain; Guanylate-binding protein, C-terminal;	R	KOG2037	Guanylate-binding protein
P18031	Tyrosine-protein phosphatase non-receptor type 1 OS=Homo sapiens OX=9606 GN=PTPN1 PE=1 SV=1	1.608	Up	1.0046e-08	PTPN1	49.966	0.806	0.801	0.7	0.828	0.779	0.729	0.787	0.712	1.38	1.036	1.315	1.276	1.09	1.275	1.188	1.317	cytoplasm	regulation of vesicle-mediated transport; single organism signaling; regulation of cell death; platelet-derived growth factor receptor signaling pathway; regulation of stress-activated MAPK cascade; positive regulation of cellular protein metabolic process; cell surface receptor signaling pathway; regulation of IRE1-mediated unfolded protein response; regulation of JUN kinase activity; regulation…	intracellular vesicle; intracellular organelle; membrane; nuclear outer membrane-endoplasmic reticulum membrane network; endoplasmic reticulum; cytoplasmic vesicle; cytoplasmic side of endoplasmic reticulum membrane; intracellular organelle part; vesicle; cytoplasm; endomembrane system; intracellular part; sorting endosome; cytosol; cell; cytoplasmic side of membrane; organelle part; early endoso…	protein tyrosine kinase binding; protein phosphatase binding; receptor binding; phosphatase activity; protein kinase binding; ephrin receptor binding; hydrolase activity; protein binding; phosphoprotein phosphatase activity; protein phosphatase 2A binding; insulin receptor binding; organic cyclic compound binding; heterocyclic compound binding; catalytic activity; binding; cadherin binding; catio…	K05696	PTPN1; tyrosine-protein phosphatase non-receptor type 1 [EC:3.1.3.48]	hsa04520 Adherens junction; hsa04910 Insulin signaling pathway; hsa04931 Insulin resistance;	IPR029021; IPR000387; IPR003595; IPR000242;	Protein-tyrosine phosphatase-like; Tyrosine specific protein phosphatases domain; Protein-tyrosine phosphatase, catalytic; PTP type protein phosphatase;	T	KOG0789	Protein tyrosine phosphatase
P35749	Myosin-11 OS=Homo sapiens OX=9606 GN=MYH11 PE=1 SV=3	0.27	Down	1.97101e-05	MYH11	227.34	0.989	1.179	2.476	1.708	2.924	1.355	1.118	2.375	0.32	0.341	0.944	0.595	0.574	0.35	0.256	0.434	nucleus	cellular component biogenesis; muscle system process; muscle fiber development; cellular developmental process; cellular component morphogenesis; single-organism process; actin cytoskeleton organization; heart development; cellular component assembly; macromolecular complex assembly; extracellular matrix organization; cardiac muscle cell development; striated muscle myosin thick filament assembly…	extracellular region part; cytoplasmic vesicle; cytoplasm; vesicle; macromolecular complex; supramolecular fiber; intracellular part; supramolecular complex; cell; organelle part; pigment granule; non-membrane-bounded organelle; extracellular exosome; cytoskeleton; intracellular; cell part; extracellular vesicle; myosin II complex; contractile fiber; myosin complex; membrane-bounded organelle; my…	actin filament binding; motor activity; nucleoside phosphate binding; hydrolase activity, acting on acid anhydrides; hydrolase activity; protein binding; structural constituent of muscle; organic cyclic compound binding; heterocyclic compound binding; pyrophosphatase activity; cytoskeletal protein binding; catalytic activity; ribonucleotide binding; binding; purine ribonucleoside binding; anion b…	K10352	MYH; myosin heavy chain	hsa05132 Salmonella infection; hsa04530 Tight junction; hsa04810 Regulation of actin cytoskeleton; hsa04270 Vascular smooth muscle contraction;	IPR002928; IPR004009; IPR027417; IPR001609; IPR008989; IPR027401;	Myosin tail; Myosin, N-terminal, SH3-like; P-loop containing nucleoside triphosphate hydrolase; Myosin head, motor domain; Myosin S1 fragment, N-terminal; Myosin-like IQ motif-containing domain;	Z	KOG0161	Myosin class II heavy chain
Q8TF64	PDZ domain-containing protein GIPC3 OS=Homo sapiens OX=9606 GN=GIPC3 PE=1 SV=1	0.423	Down	0.00022322	GIPC3	33.981	1.13	1.303	1.254	1.423	2.17	1.84	0.941	2.565	0.963	0.708	0.916	0.759	0.715	0.5	0.391	0.388	cytoplasm			protein binding; binding;	K20056			IPR001478;	PDZ domain;	TU	KOG3938	RGS-GAIP interacting protein GIPC, contains PDZ domain
O75170	Serine/threonine-protein phosphatase 6 regulatory subunit 2 OS=Homo sapiens OX=9606 GN=PPP6R2 PE=1 SV=2	3.229	Up	0.0021556	PPP6R2	104.94	0.354	0.327	0.349	0.746	0.316	0.381	0.487	0.928	1.734	0.562	1.437	2.692	3.331	0.836	1.452	0.51	cytoplasm		intracellular membrane-bounded organelle; organelle; intracellular organelle; cell part; intracellular; cytoplasm; intracellular part; cytosol; membrane-bounded organelle; cell; cytoplasmic part;	protein binding; binding;	K15500			IPR016024;	Armadillo-type fold;	D	KOG2073	SAP family cell cycle dependent phosphatase-associated protein
O15075	Serine/threonine-protein kinase DCLK1 OS=Homo sapiens OX=9606 GN=DCLK1 PE=1 SV=2	0.422	Down	3.6817e-07	DCLK1	82.223	1.38	1.47	1.34	1.348	2.141	1.285	1.447	1.471	0.531	0.597	0.93	0.715	0.685	0.585	0.397	0.569	cytoplasm	single organism signaling; localization of cell; peptidyl-serine modification; brain development; cellular developmental process; neuron development; cellular component morphogenesis; neurogenesis; single-organism process; multi-organism cellular process; cellular metabolic process; phosphate-containing compound metabolic process; response to biotic stimulus; establishment of localization; respon…	membrane; intrinsic component of plasma membrane; cell periphery; intrinsic component of membrane; integral component of plasma membrane; cell; integral component of membrane; asymmetric synapse; synapse; plasma membrane; organelle; plasma membrane part; postsynapse; cell part; membrane part; intracellular; postsynaptic density; postsynaptic specialization; neuron to neuron synapse; synapse part;	ATP binding; nucleoside phosphate binding; phosphotransferase activity, alcohol group as acceptor; nucleoside binding; ion binding; protein kinase activity; nucleotide binding; signal transducer activity; organic cyclic compound binding; heterocyclic compound binding; ribonucleoside binding; signal transducer activity, downstream of receptor; carbohydrate derivative binding; kinase activity; cata…	K08805			IPR000719; IPR003533; IPR011009;	Protein kinase domain; Doublecortin domain; Protein kinase-like domain;	T	KOG0032	Ca2+/calmodulin-dependent protein kinase, EF-Hand protein superfamily
P06727	Apolipoprotein A-IV OS=Homo sapiens OX=9606 GN=APOA4 PE=1 SV=3	0.663	Down	2.9606e-06	APOA4	45.398	1.233	1.492	1.085	1.376	1.164	1.348	1.071	1.439	0.826	0.805	0.796	0.78	0.794	0.78	0.964	1.02	extracellular	cellular component biogenesis; superoxide metabolic process; regulation of biological quality; digestion; regulation of sterol transport; alcohol metabolic process; positive regulation of biosynthetic process; triglyceride homeostasis; cellular lipid metabolic process; regulation of lipid metabolic process; cellular metabolic process; lipoprotein metabolic process; lipid biosynthetic process; rem…	endoplasmic reticulum; extracellular space; extracellular region part; cytoplasmic vesicle; cytoplasm; vesicle; plasma lipoprotein particle; triglyceride-rich plasma lipoprotein particle; macromolecular complex; intracellular part; cell; very-low-density lipoprotein particle; organelle part; early endosome; membrane-enclosed lumen; extracellular exosome; intracellular organelle lumen; protein-lip…	cholesterol binding; sterol binding; ammonium ion binding; protein dimerization activity; ion binding; antioxidant activity; lipid transporter activity; substrate-specific transporter activity; protein binding; copper ion binding; molecular function regulator; steroid binding; organic cyclic compound binding; phosphatidylcholine binding; quaternary ammonium group binding; identical protein bindin…	K08760	APOA4; apolipoprotein A-IV	hsa04975 Fat digestion and absorption; hsa04977 Vitamin digestion and absorption;
P29083	General transcription factor IIE subunit 1 OS=Homo sapiens OX=9606 GN=GTF2E1 PE=1 SV=2	1.565	Up	0.0004833	GTF2E1	49.452	0.895	0.927	0.648	0.968	0.542	0.576	0.75	0.878	1.089	1.492	0.884	1.113	1.29	1.485	1.199	1.123	cytoplasm	regulation of cellular process; snRNA transcription from RNA polymerase II promoter; cellular aromatic compound metabolic process; regulation of macromolecule metabolic process; nucleic acid-templated transcription; DNA-templated transcription, initiation; regulation of nucleobase-containing compound metabolic process; biosynthetic process; multi-organism cellular process; DNA-templated transcrip…	transferase complex, transferring phosphorus-containing groups; cytoplasm; macromolecular complex; intracellular part; cell; organelle part; membrane-enclosed lumen; catalytic complex; nucleoplasm; intracellular organelle lumen; cell part; intracellular; transcription factor TFIID complex; membrane-bounded organelle; nucleoplasm part; organelle lumen; intracellular organelle; nuclear DNA-directed…	organic cyclic compound binding; heterocyclic compound binding; DNA binding; binding; nucleic acid binding; ion binding; cation binding; metal ion binding; protein binding; sequence-specific DNA binding;	K03136	TFIIE1; transcription initiation factor TFIIE subunit alpha	hsa03022 Basal transcription factors; hsa05169 Epstein-Barr virus infection; hsa05203 Viral carcinogenesis;	IPR013137; IPR021600; IPR013083; IPR002853; IPR017919; IPR024550;	Zinc finger, TFIIB-type; Transcription factor TFIIE alpha subunit, C-terminal; Zinc finger, RING/FYVE/PHD-type; Transcription initiation factor IIE subunit alpha, N-terminal; Transcription factor TFE/TFIIEalpha HTH domain; TFIIEalpha/SarR/Rpc3 HTH domain;	K	KOG2593	Transcription initiation factor IIE, alpha subunit
P62826	GTP-binding nuclear protein Ran OS=Homo sapiens OX=9606 GN=RAN PE=1 SV=3	1.581	Up	0.00061898	RAN	24.423	0.854	0.787	0.716	0.677	0.82	0.776	0.784	0.746	1.332	1.778	0.915	0.961	1.145	1.351	1.033	1.223	cytoplasm	single organism signaling; RNA transport; cellular component biogenesis; ribonucleoprotein complex biogenesis; hippocampus development; reproductive process; posttranscriptional regulation of gene expression; brain development; cellular response to corticosteroid stimulus; positive regulation of biosynthetic process; nuclear transport; rRNA-containing ribonucleoprotein complex export from nucleus…	membrane; extracellular region part; microtubule organizing center part; cytoplasmic vesicle; vesicle; cytoplasm; sperm flagellum; 9+2 motile cilium; macromolecular complex; intracellular part; cell; manchette; organelle part; nucleocytoplasmic shuttling complex; pigment granule; recycling endosome; non-membrane-bounded organelle; membrane-enclosed lumen; cytoskeleton; extracellular exosome; micr…	nucleoside phosphate binding; receptor binding; hydrolase activity, acting on acid anhydrides; androgen receptor binding; protein binding; hydrolase activity; chromatin binding; hormone receptor binding; importin-alpha family protein binding; organic cyclic compound binding; heterocyclic compound binding; pyrophosphatase activity; GDP binding; catalytic activity; ribonucleotide binding; binding; …	K07936	RAN; GTP-binding nuclear protein Ran	hsa05166 HTLV-I infection; hsa03008 Ribosome biogenesis in eukaryotes; hsa05169 Epstein-Barr virus infection; hsa03013 RNA transport;	IPR005225; IPR027417;	Small GTP-binding protein domain; P-loop containing nucleoside triphosphate hydrolase;	U	KOG0096	GTPase Ran/TC4/GSP1 (nuclear protein transport pathway), small G protein superfamily
Q9NYB0	Telomeric repeat-binding factor 2-interacting protein 1 OS=Homo sapiens OX=9606 GN=TERF2IP PE=1 SV=1	1.533	Up	0.0049188	TERF2IP	44.259					0.626	0.896	0.867	0.729					1.166	1.361	1.214	1.04	nucleus	regulation of biological quality; positive regulation of cellular protein metabolic process; nucleic acid-templated transcription; protection from non-homologous end joining at telomere; telomere capping; regulation of telomere maintenance; cellular metabolic process; metabolic process; regulation of I-kappaB kinase/NF-kappaB signaling; positive regulation of molecular function; positive regulati…	nuclear chromosome, telomeric region; chromosome, telomeric region; telomere cap complex; cytoplasm; macromolecular complex; intracellular part; nuclear body; cell; organelle part; chromosomal part; non-membrane-bounded organelle; membrane-enclosed lumen; nucleoplasm; intracellular organelle lumen; nuclear chromosome part; intracellular; cell part; chromosome; membrane-bounded organelle; protein-…	organic cyclic compound binding; heterocyclic compound binding; DNA binding; G-rich strand telomeric DNA binding; binding; nucleic acid binding; sequence-specific single stranded DNA binding; single-stranded DNA binding; telomeric DNA binding; protein binding; single-stranded telomeric DNA binding; sequence-specific DNA binding;	K11113			IPR009057; IPR015010; IPR021661; IPR001357;	Homeobox domain-like; Rap1 Myb domain; TRF2-interacting telomeric protein/Rap1, C-terminal; BRCT domain;
Q13683	Integrin alpha-7 OS=Homo sapiens OX=9606 GN=ITGA7 PE=1 SV=3	0.543	Down	8.3892e-05	ITGA7	128.95	1.006	1.274	1.57	1.541	1.714	1.176	1.305	1.385	0.479	0.556	1.136	0.719	0.845	0.625	0.672	0.922	plasma membrane	single organism signaling; regulation of cellular process; cellular component organization; single-multicellular organism process; regulation of biological quality; cell surface receptor signaling pathway; cellular developmental process; single-organism process; response to stimulus; heterotypic cell-cell adhesion; endoderm development; gastrulation; biological adhesion; anatomical structure morp…	membrane; protein complex involved in cell adhesion; intrinsic component of plasma membrane; cell periphery; membrane protein complex; plasma membrane protein complex; plasma membrane receptor complex; receptor complex; macromolecular complex; integrin complex; intrinsic component of membrane; integral component of plasma membrane; cell; integral component of membrane; plasma membrane; plasma mem…	metal ion binding; cation binding; protein binding; binding; ion binding;	K06583	ITGA7; integrin alpha 7	hsa04151 PI3K-Akt signaling pathway; hsa04510 Focal adhesion; hsa05414 Dilated cardiomyopathy; hsa04512 ECM-receptor interaction; hsa05412 Arrhythmogenic right ventricular cardiomyopathy (ARVC); hsa04810 Regulation of actin cytoskeleton; hsa05410 Hypertrophic cardiomyopathy (HCM);	IPR032695; IPR013649;	Integrin domain; Integrin alpha-2;	W	KOG3637	Vitronectin receptor, alpha subunit
P50454	Serpin H1 OS=Homo sapiens OX=9606 GN=SERPINH1 PE=1 SV=2	2.573	Up	7.8251e-07	SERPINH1	46.44	0.377	0.485	0.418	0.574	0.76	0.549	0.616	0.56	1.849	1.458	1.147	1.448	1.787	1.168	0.857	1.452	extracellular	collagen fibril organization; cartilage development; cellular developmental process; collagen biosynthetic process; multicellular organism metabolic process; single-organism process; biosynthetic process; negative regulation of peptidase activity; metabolic process; response to topologically incorrect protein; chondrocyte differentiation; chondrocyte development involved in endochondral bone morp…	membrane; extracellular region part; endoplasmic reticulum; membrane microdomain; vesicle; cytoplasm; intracellular part; cell; organelle part; extracellular exosome; membrane-enclosed lumen; intracellular organelle lumen; membrane part; cell part; intracellular; whole membrane; membrane region; extracellular vesicle; membrane raft; membrane-bounded organelle; organelle lumen; intracellular organ…	RNA binding; macromolecular complex binding; peptidase regulator activity; protein binding; enzyme inhibitor activity; molecular function regulator; endopeptidase inhibitor activity; heterocyclic compound binding; organic cyclic compound binding; serine-type endopeptidase inhibitor activity; enzyme regulator activity; binding; nucleic acid binding; peptidase inhibitor activity; endopeptidase regu…	K09501			IPR033830; IPR023796;	Serpin H1 inhibitory domain; Serpin domain;	V	KOG2392	Serpin
P30740	Leukocyte elastase inhibitor OS=Homo sapiens OX=9606 GN=SERPINB1 PE=1 SV=1	0.529	Down	0.0046629	SERPINB1	42.741	1.329	1.297	1.52	1.197	1.125	1.899	1.524	1.404	0.649	0.412	1.299	0.76	0.303	0.51	1.276	0.762	cytoplasm	regulation of cellular process; negative regulation of endopeptidase activity; leukocyte activation; neutrophil activation involved in immune response; immune effector process; regulation of macromolecule metabolic process; single-organism process; negative regulation of cellular process; negative regulation of biological process; negative regulation of cellular metabolic process; response to sti…	membrane; secretory granule lumen; extracellular space; extracellular region part; cytoplasmic vesicle; cytoplasm; vesicle; cytoplasmic vesicle part; intracellular part; cell; organelle part; membrane-enclosed lumen; extracellular exosome; vesicle lumen; intracellular organelle lumen; intracellular; cell part; secretory vesicle; extracellular vesicle; secretory granule; membrane-bounded organelle…	serine-type endopeptidase inhibitor activity; enzyme regulator activity; peptidase inhibitor activity; peptidase regulator activity; endopeptidase regulator activity; molecular function regulator; enzyme inhibitor activity; endopeptidase inhibitor activity;	K13963	SERPINB; serpin B	hsa05146 Amoebiasis;	IPR023796;	Serpin domain;	V	KOG2392	Serpin
P53814	Smoothelin OS=Homo sapiens OX=9606 GN=SMTN PE=1 SV=7	0.32	Down	1.93072e-05	SMTN	99.058	1.064	1.066	2.403	1.487	2.555	1.379	1.074	2.4	0.412	0.462	0.921	0.623	0.633	0.414	0.347	0.48	nucleus	developmental process; single-multicellular organism process; muscle system process; system process; system development; single-organism process; multicellular organismal process; animal organ development; muscle contraction; smooth muscle contraction; muscle organ development; single-organism developmental process; muscle structure development; multicellular organism development; anatomical stru…	cytoskeleton; organelle; intracellular organelle; intracellular non-membrane-bounded organelle; cell part; intracellular; cytoplasm; intracellular part; cell; actin cytoskeleton; non-membrane-bounded organelle;	actin binding; protein binding; cytoskeletal protein binding; structural constituent of muscle; structural molecule activity; binding;				IPR001715; IPR022189;	Calponin homology domain; Smoothelin;	R	KOG4678	FOG: Calponin homology domain
Q6NZI2	Caveolae-associated protein 1 OS=Homo sapiens OX=9606 GN=CAVIN1 PE=1 SV=1	0.479	Down	2.0657e-05	CAVIN1	43.476	1.107	1.347	1.643	1.712	1.882	1.081	1.286	1.768	0.636	0.481	0.915	0.768	0.921	0.538	0.553	0.851	nucleus	regulation of cellular process; transcription initiation from RNA polymerase I promoter; cellular aromatic compound metabolic process; transcription from RNA polymerase I promoter; regulation of macromolecule metabolic process; nucleic acid-templated transcription; regulation of nucleobase-containing compound metabolic process; DNA-templated transcription, initiation; biosynthetic process; cellul…	membrane; endoplasmic reticulum; membrane microdomain; cell periphery; cytoplasm; macromolecular complex; intracellular part; cell; organelle part; membrane-enclosed lumen; nucleoplasm; intracellular organelle lumen; plasma membrane region; membrane part; intracellular; cell part; whole membrane; membrane region; membrane raft; membrane-bounded organelle; organelle lumen; intracellular organelle;…	organic cyclic compound binding; heterocyclic compound binding; RNA binding; rRNA primary transcript binding; binding; nucleic acid binding; protein binding; rRNA binding;	K19387
Q15124	Phosphoglucomutase-like protein 5 OS=Homo sapiens OX=9606 GN=PGM5 PE=1 SV=2	0.346	Down	2.1032e-05	PGM5	62.224	1.11	1.143	2.164	1.608	2.634	1.344	1.178	2.046	0.383	0.411	1.049	0.654	0.711	0.461	0.386	0.528	cytoskeleton	cell adhesion; biological adhesion; metabolic process; carbohydrate metabolic process; primary metabolic process; organic substance metabolic process;	membrane; spot adherens junction; membrane protein complex; cell-cell contact zone; cell periphery; cell junction; myofibril; cytoplasm; macromolecular complex; supramolecular fiber; intracellular part; Z disc; cell-cell adherens junction; supramolecular complex; cell-cell junction; cell; cytoplasmic side of plasma membrane; cytoplasmic side of membrane; I band; actin filament bundle; intercalate…	magnesium ion binding; isomerase activity; catalytic activity; binding; intramolecular transferase activity, phosphotransferases; ion binding; metal ion binding; cation binding; structural molecule activity; intramolecular transferase activity;	K15636			IPR005846; IPR005843; IPR005845; IPR016055; IPR005844;	Alpha-D-phosphohexomutase, alpha/beta/alpha domain III; Alpha-D-phosphohexomutase, C-terminal; Alpha-D-phosphohexomutase, alpha/beta/alpha domain II; Alpha-D-phosphohexomutase, alpha/beta/alpha I/II/III; Alpha-D-phosphohexomutase, alpha/beta/alpha domain I;	G	KOG0625	Phosphoglucomutase
Q9NVD7	Alpha-parvin OS=Homo sapiens OX=9606 GN=PARVA PE=1 SV=1	0.49	Down	8.0281e-05	PARVA	42.243	0.993	1.16	1.936	1.377	1.988	1.269	1.175	1.892	0.62	0.649	0.993	0.783	0.891	0.521	0.512	0.812	cyto_nucl	cellular component biogenesis; actin filament-based movement; outflow tract septum morphogenesis; regulation of biological quality; actin-mediated cell contraction; localization of cell; blood vessel development; cellular developmental process; cellular component morphogenesis; cilium assembly; single-organism process; heterotypic cell-cell adhesion; cilium organization; biological adhesion; resp…	intracellular organelle; membrane; intracellular non-membrane-bounded organelle; cell periphery; cell junction; myofibril; cytoplasm; anchoring junction; supramolecular fiber; intracellular part; Z disc; cytosol; supramolecular complex; cell; I band; organelle part; plasma membrane; supramolecular polymer; non-membrane-bounded organelle; cytoskeleton; organelle; focal adhesion; intracellular; cel…	actin binding; cell adhesion molecule binding; protein binding; cytoskeletal protein binding; binding; cadherin binding;	K06275	PARV; parvin	hsa04510 Focal adhesion;	IPR001715;	Calponin homology domain;	Z	KOG3631	Alpha-parvin and related focal adhesion proteins
Q9BWT3	Poly(A) polymerase gamma OS=Homo sapiens OX=9606 GN=PAPOLG PE=1 SV=2	1.824	Up	0.016163	PAPOLG	82.802					0.692	0.712	0.731	0.547					1.163	1.701	0.785	1.243	nucleus	RNA 3'-end processing; RNA processing; RNA polyadenylation; cellular aromatic compound metabolic process; mRNA 3'-end processing; mRNA polyadenylation; organic cyclic compound metabolic process; nitrogen compound metabolic process; primary metabolic process; cellular metabolic process; organic substance metabolic process; mRNA processing; RNA metabolic process; metabolic process; nucleic acid met…	intracellular organelle; membrane; cytoplasm; intracellular organelle part; nuclear lumen; intracellular part; cytosol; nuclear body; cell; organelle part; organelle; intracellular membrane-bounded organelle; membrane-enclosed lumen; nucleoplasm; nucleus; intracellular organelle lumen; cell part; intracellular; membrane-bounded organelle; nucleoplasm part; cytoplasmic part; organelle lumen; nucle…	RNA binding; ATP binding; nucleoside phosphate binding; nucleoside binding; ion binding; nucleotide binding; adenylyltransferase activity; heterocyclic compound binding; organic cyclic compound binding; ribonucleoside binding; polynucleotide adenylyltransferase activity; carbohydrate derivative binding; nucleotidyltransferase activity; ribonucleotide binding; catalytic activity; binding; purine r…	K14376	PAP; poly(A) polymerase [EC:2.7.7.19]	hsa03015 mRNA surveillance pathway;	IPR011068; IPR007012; IPR002934; IPR007010;	Nucleotidyltransferase, class I, C-terminal-like; Poly(A) polymerase, central domain; Polymerase, nucleotidyl transferase domain; Poly(A) polymerase, RNA-binding domain;	A	KOG2245	Poly(A) polymerase and related nucleotidyltransferases
P12111	Collagen alpha-3(VI) chain OS=Homo sapiens OX=9606 GN=COL6A3 PE=1 SV=5	0.452	Down	1.121e-07	COL6A3	343.67	1.25	1.166	1.56	1.676	1.547	1.247	1.73	1.757	0.759	0.536	0.79	0.704	0.804	0.545	0.54	0.714	extracellular	regulation of cellular process; cellular component organization; single-multicellular organism process; negative regulation of endopeptidase activity; regulation of macromolecule metabolic process; multicellular organism metabolic process; single-organism process; negative regulation of cellular metabolic process; negative regulation of cellular process; negative regulation of biological process;…	membrane; extracellular space; extracellular region part; endoplasmic reticulum; cell periphery; vesicle; cytoplasm; macromolecular complex; supramolecular fiber; intracellular part; supramolecular complex; cell; collagen trimer; organelle part; extracellular exosome; membrane-enclosed lumen; intracellular organelle lumen; cell part; intracellular; extracellular vesicle; membrane-bounded organell…	serine-type endopeptidase inhibitor activity; enzyme regulator activity; binding; peptidase inhibitor activity; peptidase regulator activity; protein binding; endopeptidase regulator activity; enzyme inhibitor activity; molecular function regulator; endopeptidase inhibitor activity;	K06238	COL6A; collagen, type VI, alpha	hsa04151 PI3K-Akt signaling pathway; hsa04510 Focal adhesion; hsa04512 ECM-receptor interaction; hsa04974 Protein digestion and absorption;	IPR013783; IPR003961; IPR002223; IPR002035;	Immunoglobulin-like fold; Fibronectin type III; Pancreatic trypsin inhibitor Kunitz domain; von Willebrand factor, type A;	W	KOG3544	Collagens (type IV and type XIII), and related proteins
P29508	Serpin B3 OS=Homo sapiens OX=9606 GN=SERPINB3 PE=1 SV=2	0.582	Down	0.035863	SERPINB3	44.564	1.089	1.334	1.455	1.154	0.947	1.09	1.307	2.694	0.452	1.12	0.691	0.898	0.344	0.181	1.807	0.947	cytoplasm	entry into host; single organism signaling; regulation of stress-activated MAPK cascade; positive regulation of cell migration; regulation of epithelial to mesenchymal transition; leukocyte activation; positive regulation of cellular protein metabolic process; regulation of JUN kinase activity; regulation of protein serine/threonine kinase activity; negative regulation of peptidase activity; posi…	secretory granule lumen; extracellular space; extracellular region part; cytoplasmic vesicle; cytoplasm; vesicle; cytoplasmic vesicle part; intracellular part; azurophil granule lumen; cell; organelle part; vacuolar lumen; extracellular exosome; membrane-enclosed lumen; vesicle lumen; intracellular organelle lumen; intracellular; cell part; secretory vesicle; lysosome; extracellular vesicle; secr…	peptidase regulator activity; protein binding; enzyme inhibitor activity; molecular function regulator; endopeptidase inhibitor activity; cysteine-type endopeptidase inhibitor activity; virus receptor activity; protease binding; molecular transducer activity; serine-type endopeptidase inhibitor activity; receptor activity; enzyme regulator activity; binding; peptidase inhibitor activity; endopept…	K13963	SERPINB; serpin B	hsa05146 Amoebiasis;	IPR023796;	Serpin domain;	V	KOG2392	Serpin
A6NCM1	IQ and AAA domain-containing protein 1-like OS=Homo sapiens OX=9606 GN=IQCA1L PE=3 SV=3	0.221	Down	6.2569e-05	IQCA1L	94.93	0.917	1.072	2.793	2.028	3.689	1.259	1.065	2.462	0.218	0.257	0.967	0.546	0.634	0.274	0.192	0.29	cytoplasm			ATP binding; nucleoside phosphate binding; nucleoside binding; ion binding; protein binding; nucleotide binding; organic cyclic compound binding; heterocyclic compound binding; ribonucleoside binding; carbohydrate derivative binding; ribonucleotide binding; binding; purine ribonucleoside binding; anion binding; purine ribonucleotide binding; adenyl ribonucleotide binding; adenyl nucleotide bindin…				IPR003959; IPR027417;	ATPase, AAA-type, core; P-loop containing nucleoside triphosphate hydrolase;	O	KOG0740	AAA+-type ATPase
Q16610	Extracellular matrix protein 1 OS=Homo sapiens OX=9606 GN=ECM1 PE=1 SV=2	0.475	Down	0.00141527	ECM1	60.673	1.389	1.264	1.636	1.226	1.118	1.554	1.706	2.034	0.566	0.452	1.257	0.699	0.38	0.357	1.077	0.873	extracellular	single organism signaling; regulation of bone mineralization; regulation of biomineral tissue development; negative regulation of peptidase activity; angiogenesis; positive regulation of multicellular organismal process; regulation of localization; regulation of epithelial cell proliferation; regulation of I-kappaB kinase/NF-kappaB signaling; positive regulation of vasculature development; single…	secretory granule lumen; platelet dense granule; extracellular space; extracellular region part; cytoplasmic vesicle; cytoplasm; vesicle; cytoplasmic vesicle part; intracellular part; cell; organelle part; membrane-enclosed lumen; extracellular exosome; vesicle lumen; intracellular organelle lumen; cell part; intracellular; secretory vesicle; extracellular vesicle; secretory granule; membrane-bou…	protease binding; laminin binding; receptor binding; binding; cytokine receptor binding; growth factor receptor binding; protein C-terminus binding; protein binding; interleukin-2 receptor binding; signal transducer activity; extracellular matrix binding; enzyme binding;				IPR020858;	Serum albumin-like;
Q9Y4F3	Meiosis regulator and mRNA stability factor 1 OS=Homo sapiens OX=9606 GN=MARF1 PE=1 SV=6	0.441	Down	0.00082131	MARF1	192.86					2.064	1.22	1.466	1.479					0.754	0.558	0.757	0.675	nucleus	reproductive process; cellular developmental process; single-organism process; negative regulation of phosphatase activity; cellular metabolic process; metabolic process; single organism reproductive process; regulation of dephosphorylation; macromolecule metabolic process; developmental process; negative regulation of dephosphorylation; regulation of gene expression; cellular response to stimulu…	membrane; intracellular organelle; peroxisome; cytoplasm; endomembrane system; intracellular part; cell; organelle; intracellular membrane-bounded organelle; intracellular; cell part; microbody; membrane-bounded organelle; Golgi apparatus; cytoplasmic part;	organic cyclic compound binding; heterocyclic compound binding; RNA binding; nucleoside phosphate binding; binding; nucleic acid binding; nucleotide binding; small molecule binding;	K17573			IPR034191; IPR021139; IPR024582; IPR000504; IPR034189; IPR012677; IPR025605; IPR029060;	Marf1, RNA recognition motif 2; NYN domain, limkain-b1-type; Marf1, conserved domain; RNA recognition motif domain; Marf1, RNA recognition motif 1; Nucleotide-binding alpha-beta plait domain; OST-HTH/LOTUS domain; PIN domain-like;
Q12849	G-rich sequence factor 1 OS=Homo sapiens OX=9606 GN=GRSF1 PE=1 SV=3	1.667	Up	0.000103771	GRSF1	53.126	0.805	0.709	0.848	0.786	0.87	0.669	0.66	0.553	1.095	1.155	1.151	1.554	1.015	1.795	0.946	1.127	mitochondria	RNA 3'-end processing; morphogenesis of an epithelium; single-multicellular organism process; cellular aromatic compound metabolic process; mRNA 3'-end processing; mRNA polyadenylation; pattern specification process; single-organism process; cellular metabolic process; organic substance metabolic process; anatomical structure morphogenesis; tissue morphogenesis; metabolic process; heterocycle met…	intracellular organelle; mitochondrial matrix; mitochondrial nucleoid; mitochondrial part; intracellular non-membrane-bounded organelle; cytoplasm; intracellular organelle part; macromolecular complex; intracellular part; cell; organelle part; mitochondrion; non-membrane-bounded organelle; membrane-enclosed lumen; intracellular membrane-bounded organelle; organelle; intracellular organelle lumen;…	organic cyclic compound binding; heterocyclic compound binding; mRNA binding; RNA binding; nucleoside phosphate binding; binding; nucleic acid binding; nucleotide binding; small molecule binding;				IPR000504; IPR012677;	RNA recognition motif domain; Nucleotide-binding alpha-beta plait domain;	A	KOG4211	Splicing factor hnRNP-F and related RNA-binding proteins
O95429	BAG family molecular chaperone regulator 4 OS=Homo sapiens OX=9606 GN=BAG4 PE=1 SV=1	1.574	Up	0.023303	BAG4	49.593	0.7	0.809	0.813	0.839					1.524	1.054	0.883	1.515					nucleus	single organism signaling; cellular component biogenesis; regulation of cell death; regulation of biological quality; positive regulation of cell migration; positive regulation of cellular protein metabolic process; regulation of protein kinase B signaling; cell surface receptor signaling pathway; regulation of fibroblast migration; regulation of protein targeting; negative regulation of intracel…	intracellular organelle; membrane; cell periphery; cytoplasm; intracellular part; cell; cytosol; plasma membrane; intracellular membrane-bounded organelle; organelle; nucleus; intracellular; cell part; membrane-bounded organelle; cytoplasmic part;	RNA binding; nucleoside phosphate binding; ubiquitin protein ligase binding; chaperone binding; nucleoside-triphosphatase regulator activity; protein binding; nucleotide binding; molecular function regulator; signal transducer activity; heterocyclic compound binding; organic cyclic compound binding; signal transducer activity, downstream of receptor; enzyme regulator activity; binding; nucleic ac…	K09558	BAG4; BCL2-associated athanogene 4	hsa04668 TNF signaling pathway;	IPR003103;	BAG domain;	T	KOG4361	BCL2-associated athanogene-like proteins and related BAG family chaperone regulators
Q8WYP5	Protein ELYS OS=Homo sapiens OX=9606 GN=AHCTF1 PE=1 SV=3	1.524	Up	0.00116432	AHCTF1	252.5	0.831	0.765	0.602	0.705	0.839	0.786	0.788	0.944	1.125	1.873	0.861	0.954	1.304	1.265	1.21	0.946	cytoplasm	cellular component biogenesis; RNA transport; regulation of cellular process; cellular component organization; nucleus organization; regulation of macromolecule metabolic process; mRNA transport; regulation of nucleobase-containing compound metabolic process; single-organism process; protein transport; establishment of RNA localization; nuclear pore complex assembly; establishment of localization…	membrane; extracellular region part; organelle membrane; vesicle; cytoplasm; macromolecular complex; intracellular part; cell; condensed chromosome kinetochore; organelle part; non-membrane-bounded organelle; chromosomal part; membrane-enclosed lumen; extracellular exosome; condensed chromosome; nucleoplasm; nuclear membrane; intracellular organelle lumen; cell part; intracellular; chromosome; ex…	organic cyclic compound binding; heterocyclic compound binding; DNA binding; binding; nucleic acid binding transcription factor activity; nucleic acid binding; transcription factor activity, sequence-specific DNA binding;				IPR032040; IPR025151; IPR011047;	ELYS, beta-propeller domain; ELYS-like domain; Quinoprotein alcohol dehydrogenase-like superfamily;
Q02252	"""Methylmalonate-semialdehyde dehydrogenase [acylating], mitochondrial OS=Homo sapiens OX=9606 GN=ALDH6A1 PE=1 SV=2"""	0.633	Down	1.59241e-05	ALDH6A1	57.839	1.277	1.519	1.391	1.053	1.228	1.496	1.025	1.233	0.658	0.766	0.778	0.931	0.789	0.984	0.731	0.832	mitochondria	alpha-amino acid catabolic process; cellular aromatic compound metabolic process; cellular developmental process; single-organism process; thymine catabolic process; cellular metabolic process; valine metabolic process; organic substance metabolic process; cellular nitrogen compound catabolic process; cell differentiation; metabolic process; cellular amino acid metabolic process; heterocycle meta…	mitochondrial matrix; intracellular organelle; extracellular region part; mitochondrial part; vesicle; cytoplasm; intracellular organelle part; nuclear lumen; intracellular part; cell; extracellular region; mitochondrion; organelle part; extracellular exosome; membrane-enclosed lumen; organelle; intracellular membrane-bounded organelle; nucleus; nucleoplasm; intracellular organelle lumen; cell pa…	RNA binding; ion binding; oxidoreductase activity, acting on the aldehyde or oxo group of donors; malonate-semialdehyde dehydrogenase (acetylating) activity; sulfur compound binding; cofactor binding; oxidoreductase activity; heterocyclic compound binding; organic cyclic compound binding; oxidoreductase activity, acting on the aldehyde or oxo group of donors, NAD or NADP as acceptor; catalytic ac…	K00140	mmsA; malonate-semialdehyde dehydrogenase (acetylating) / methylmalonate-semialdehyde dehydrogenase [EC:1.2.1.18 1.2.1.27]	hsa00562 Inositol phosphate metabolism; hsa00280 Valine, leucine and isoleucine degradation; hsa00410 beta-Alanine metabolism; hsa00640 Propanoate metabolism; hsa01100 Metabolic pathways; hsa01200 Carbon metabolism;	IPR016161; IPR015590; IPR016162; IPR016163;	Aldehyde/histidinol dehydrogenase; Aldehyde dehydrogenase domain; Aldehyde dehydrogenase N-terminal domain; Aldehyde dehydrogenase, C-terminal;	EG	KOG2449	Methylmalonate semialdehyde dehydrogenase
O43353	Receptor-interacting serine/threonine-protein kinase 2 OS=Homo sapiens OX=9606 GN=RIPK2 PE=1 SV=2	1.622	Up	0.0050818	RIPK2	61.194	0.678	0.817	0.723	0.811					1.046	1.609	1.194	1.064					cytoplasm	single organism signaling; regulation of leukocyte activation; regulation of cell death; regulation of stress-activated MAPK cascade; regulation of tumor necrosis factor production; defense response to other organism; positive regulation of biosynthetic process; peptidyl-tyrosine modification; nucleotide-binding domain, leucine rich repeat containing receptor signaling pathway; response to interl…	intracellular organelle; intracellular non-membrane-bounded organelle; vesicle; cytoplasm; macromolecular complex; intracellular part; cytosol; cell; non-membrane-bounded organelle; organelle; cytoskeleton; intracellular; cell part; protein complex; membrane-bounded organelle; cytoplasmic part;	nucleoside phosphate binding; phosphotransferase activity, alcohol group as acceptor; receptor binding; protein dimerization activity; CARD domain binding; protein tyrosine kinase activity; LIM domain binding; protein binding; protein kinase activity; signal transducer activity; heterocyclic compound binding; organic cyclic compound binding; kinase activity; identical protein binding; ribonucleot…	K08846	RIPK2; receptor-interacting serine/threonine-protein kinase 2 [EC:2.7.11.1]	hsa05152 Tuberculosis; hsa04722 Neurotrophin signaling pathway; hsa05131 Shigellosis; hsa04621 NOD-like receptor signaling pathway;	IPR000719; IPR001245; IPR011029; IPR011009; IPR001315;	Protein kinase domain; Serine-threonine/tyrosine-protein kinase catalytic domain; Death-like domain; Protein kinase-like domain; CARD domain;	T	KOG0192	Tyrosine kinase specific for activated (GTP-bound) p21cdc42Hs
Q9Y4C8	Probable RNA-binding protein 19 OS=Homo sapiens OX=9606 GN=RBM19 PE=1 SV=3	2.335	Up	8.9909e-07	RBM19	107.33					0.572	0.574	0.588	0.544					1.208	1.435	1.255	1.422	nucleus	developmental process; positive regulation of embryonic development; single-multicellular organism process; single-organism process; multicellular organismal process; positive regulation of biological process; regulation of multicellular organismal process; regulation of biological process; regulation of embryonic development; positive regulation of multicellular organismal process; single-organi…	intracellular organelle; membrane; intracellular non-membrane-bounded organelle; cytoplasm; intracellular organelle part; nuclear lumen; intracellular part; nucleolus; cell; organelle part; non-membrane-bounded organelle; organelle; intracellular membrane-bounded organelle; membrane-enclosed lumen; nucleoplasm; nucleus; intracellular organelle lumen; cell part; intracellular; chromosome; membrane…	organic cyclic compound binding; heterocyclic compound binding; RNA binding; nucleoside phosphate binding; binding; nucleic acid binding; nucleotide binding; small molecule binding;	K14787			IPR000504; IPR012677; IPR003954;	RNA recognition motif domain; Nucleotide-binding alpha-beta plait domain; RNA recognition motif domain, eukaryote;	R	KOG0110	RNA-binding protein (RRM superfamily)
Q9BYT8	"""Neurolysin, mitochondrial OS=Homo sapiens OX=9606 GN=NLN PE=1 SV=1"""	1.538	Up	0.0029172	NLN	80.651	0.881	0.833	0.68	0.657	0.802	0.854	0.724	0.8	0.871	1.616	1.218	0.996	1.811	1.058	0.933	1.08	mitochondria	regulation of cellular process; regulation of skeletal muscle tissue development; regulation of carbohydrate biosynthetic process; peptide metabolic process; regulation of gluconeogenesis; regulation of muscle organ development; regulation of skeletal muscle cell differentiation; regulation of glucose metabolic process; cellular metabolic process; regulation of multicellular organismal process; o…	membrane; intracellular organelle; mitochondrial part; cell periphery; intracellular organelle part; organelle envelope; cytoplasm; intracellular part; cell; extracellular region; mitochondrion; organelle part; plasma membrane; mitochondrial envelope; intracellular membrane-bounded organelle; organelle; membrane-enclosed lumen; organelle envelope lumen; intracellular organelle lumen; intracellula…	endopeptidase activity; metalloendopeptidase activity; peptidase activity; peptide binding; catalytic activity; binding; ion binding; metal ion binding; cation binding; peptidase activity, acting on L-amino acid peptides; hydrolase activity; metallopeptidase activity; amide binding;	K01393	NLN; neurolysin [EC:3.4.24.16]	hsa04614 Renin-angiotensin system;	IPR024077; IPR001567; IPR024080; IPR024079;	Neurolysin/Thimet oligopeptidase, domain 2; Peptidase M3A/M3B catalytic domain; Neurolysin/Thimet oligopeptidase, N-terminal; Metallopeptidase, catalytic domain;	O	KOG2089	Metalloendopeptidase family - saccharolysin & thimet oligopeptidase
Q9UQ16	Dynamin-3 OS=Homo sapiens OX=9606 GN=DNM3 PE=1 SV=4	0.251	Down	0.00025588	DNM3	97.745	0.688	1.17	3.677	1.232	2.243	1.413	1.011	3.604	0.256	0.279	0.929	0.528	0.726	0.394	0.383	0.279	cytoplasm	cellular component biogenesis; regulation of biological quality; filopodium assembly; negative regulation of dendrite development; regulation of cell projection assembly; cellular metabolic process; vesicle-mediated transport in synapse; metabolic process; negative regulation of dendrite morphogenesis; macromolecular complex assembly; macromolecule metabolic process; single-organism transport; ne…	membrane; dendrite; extracellular region part; organelle membrane; cytoplasm; postsynaptic endocytic zone; cell; supramolecular complex; dendritic spine; organelle part; non-membrane-bounded organelle; extracellular exosome; plasma membrane region; photoreceptor inner segment; intracellular; postsynaptic density; synaptic membrane; neuron projection; membrane-bounded organelle; neuron part; polym…	type 1 metabotropic glutamate receptor binding; nucleoside phosphate binding; receptor binding; hydrolase activity, acting on acid anhydrides; nitric-oxide synthase binding; hydrolase activity; protein binding; heterocyclic compound binding; organic cyclic compound binding; cytoskeletal protein binding; pyrophosphatase activity; ribonucleotide binding; catalytic activity; binding; microtubule bin…	K01528	DNM; dynamin GTPase [EC:3.6.5.5]	hsa05100 Bacterial invasion of epithelial cells; hsa04666 Fc gamma R-mediated phagocytosis; hsa04072 Phospholipase D signaling pathway; hsa04144 Endocytosis; hsa04961 Endocrine and other factor-regulated calcium reabsorption; hsa04721 Synaptic vesicle cycle;	IPR030381; IPR003130; IPR001401; IPR020850; IPR027417; IPR001849; IPR011993; IPR000375;	Dynamin-type guanine nucleotide-binding (G) domain; Dynamin GTPase effector; Dynamin, GTPase domain; GTPase effector domain; P-loop containing nucleoside triphosphate hydrolase; Pleckstrin homology domain; PH domain-like; Dynamin central domain;	UR	KOG0446	Vacuolar sorting protein VPS1, dynamin, and related proteins
Q9UKK6	NTF2-related export protein 1 OS=Homo sapiens OX=9606 GN=NXT1 PE=1 SV=1	1.586	Up	0.021296	NXT1	15.847	0.732	0.716	0.854	0.755					1.099	1.741	1.066	0.941					nucleus	RNA transport; intracellular transport; mRNA transport; nuclear export; nuclear transport; establishment of RNA localization; protein transport; organic substance metabolic process; establishment of localization; mRNA-containing ribonucleoprotein complex export from nucleus; metabolic process; establishment of localization in cell; nucleic acid transport; nucleobase-containing compound transport;…	intracellular organelle; nuclear pore; nuclear envelope; cytoplasm; organelle envelope; intracellular organelle part; macromolecular complex; endomembrane system; nuclear lumen; intracellular part; cytosol; nuclear body; cell; organelle part; organelle; intracellular membrane-bounded organelle; membrane-enclosed lumen; nucleoplasm; nucleus; intracellular organelle lumen; nuclear speck; cell part;…	small GTPase binding; Ras GTPase binding; binding; protein binding; Ran GTPase binding; GTPase binding; enzyme binding;	K14285	NXT1_2; NTF2-related export protein 1/2	hsa03015 mRNA surveillance pathway; hsa03008 Ribosome biogenesis in eukaryotes; hsa03013 RNA transport; hsa05164 Influenza A;	IPR002075; IPR018222; IPR032710;	Nuclear transport factor 2; Nuclear transport factor 2, eukaryote; NTF2-like domain;	A	KOG4353	RNA export factor NXT1
Q86WX3	Active regulator of SIRT1 OS=Homo sapiens OX=9606 GN=RPS19BP1 PE=1 SV=1	1.607	Up	0.01374	RPS19BP1	15.434	0.641	0.781	0.72	0.894					1.035	1.68	1.075	1.09					nucleus		intracellular organelle; intracellular non-membrane-bounded organelle; cytoplasm; intracellular organelle part; nuclear lumen; intracellular part; nucleolus; cytosol; cell; organelle part; non-membrane-bounded organelle; organelle; intracellular membrane-bounded organelle; membrane-enclosed lumen; nucleoplasm; nucleus; intracellular organelle lumen; cell part; intracellular; membrane-bounded orga…	organic cyclic compound binding; heterocyclic compound binding; RNA binding; binding; nucleic acid binding; protein binding; enzyme binding;
Q8N668	COMM domain-containing protein 1 OS=Homo sapiens OX=9606 GN=COMMD1 PE=1 SV=1	0.65	Down	0.0157388	COMMD1	21.178	1.076	1.439	1.343	1.282					1.034	0.597	0.795	0.916					cytoplasm	regulation of biological quality; positive regulation of cellular protein metabolic process; negative regulation of sequence-specific DNA binding transcription factor activity; nucleic acid-templated transcription; regulation of protein localization to cell surface; biosynthetic process; negative regulation of sodium ion transport; negative regulation of sodium ion transmembrane transport; cellul…	membrane; extracellular region part; organelle membrane; cytoplasmic vesicle; cytoplasm; vesicle; cytoplasmic vesicle part; macromolecular complex; intracellular part; cell; organelle part; early endosome; recycling endosome; membrane-enclosed lumen; extracellular exosome; catalytic complex; nucleoplasm; intracellular organelle lumen; intracellular; cell part; whole membrane; extracellular vesicl…	phosphatidylinositol phosphate binding; protein dimerization activity; ion binding; phosphatidylinositol-3,5-bisphosphate binding; protein binding; copper ion binding; phosphatidylinositol-3,4-bisphosphate binding; phosphatidylinositol bisphosphate binding; identical protein binding; transition metal ion binding; phosphatidic acid binding; protein homodimerization activity; phosphatidylinositol-4…				IPR017920; IPR033776;	COMM domain; COMMD1 N-terminal domain;
Q9UHB6	LIM domain and actin-binding protein 1 OS=Homo sapiens OX=9606 GN=LIMA1 PE=1 SV=1	1.726	Up	4.2903e-05	LIMA1	85.225	0.805	0.807	0.786	0.833	0.748	0.643	0.605	0.551	1.438	1.122	1.035	1.323	1.461	0.858	1.121	1.615	nucleus	cellular component biogenesis; regulation of cellular process; cellular component organization; regulation of biological quality; negative regulation of actin filament depolymerization; regulation of actin cytoskeleton organization; negative regulation of cellular component organization; actin filament organization; single-organism process; actin filament bundle assembly; negative regulation of b…	cluster of actin-based cell projections; brush border; cell junction; cytoplasm; intracellular part; cell; cell division site part; organelle part; actin filament bundle; non-membrane-bounded organelle; cytoskeleton; focal adhesion; cell part; intracellular; adherens junction; stress fiber; cell-substrate junction; cleavage furrow; actomyosin; cell-substrate adherens junction; intracellular organ…	actin filament binding; ion binding; macromolecular complex binding; protein binding; zinc ion binding; cell adhesion molecule binding; cytoskeletal protein binding; transition metal ion binding; actin monomer binding; binding; cadherin binding; actin binding; metal ion binding; cation binding; protein complex binding;				IPR001781;	Zinc finger, LIM-type;	TZ	KOG1700	Regulatory protein MLP and related LIM proteins
A8TX70	Collagen alpha-5(VI) chain OS=Homo sapiens OX=9606 GN=COL6A5 PE=1 SV=1	0.27	Down	1.79548e-05	COL6A5	289.92	2.375	1.012	2.527	1.003	0.927	2.833	1.106	2.247	0.405	0.417	0.511	0.586	0.395	0.404	0.349	0.715	endoplasmic reticulum	single-multicellular organism process; single-organism catabolic process; multicellular organism metabolic process; single-organism process; multicellular organismal process; organic substance metabolic process; biological adhesion; multicellular organismal catabolic process; metabolic process; single-organism metabolic process; collagen metabolic process; cell adhesion; macromolecule metabolic p…	extracellular matrix; macromolecular complex; extracellular region part; protein complex; extracellular region; collagen trimer; proteinaceous extracellular matrix;	protein binding; binding;	K06238	COL6A; collagen, type VI, alpha	hsa04151 PI3K-Akt signaling pathway; hsa04510 Focal adhesion; hsa04512 ECM-receptor interaction; hsa04974 Protein digestion and absorption;	IPR002035;	von Willebrand factor, type A;	W	KOG3544	Collagens (type IV and type XIII), and related proteins
Q9BWF3	RNA-binding protein 4 OS=Homo sapiens OX=9606 GN=RBM4 PE=1 SV=1	1.517	Up	0.0004955	RBM4	40.313					0.671	0.81	0.826	0.778					1.234	1.212	1.039	1.196	cyto_nucl	single organism signaling; peptide metabolic process; regulation of alternative mRNA splicing, via spliceosome; posttranscriptional regulation of gene expression; regulation of translation in response to stress; response to arsenic-containing substance; cellular metabolic process; response to external stimulus; metabolic process; cytoplasmic translation; regulation of localization; macromolecule …	cytoplasm; macromolecular complex; intracellular part; nuclear body; cell; cytoplasmic ribonucleoprotein granule; organelle part; non-membrane-bounded organelle; membrane-enclosed lumen; nucleoplasm; intracellular organelle lumen; nuclear speck; intracellular; cell part; membrane-bounded organelle; nucleoplasm part; organelle lumen; intracellular organelle; cytoplasmic stress granule; intracellul…	RNA binding; nucleoside phosphate binding; pre-mRNA intronic binding; mRNA 3'-UTR binding; ion binding; protein binding; pre-mRNA intronic pyrimidine-rich binding; nucleotide binding; zinc ion binding; heterocyclic compound binding; organic cyclic compound binding; mRNA binding; transition metal ion binding; binding; nucleic acid binding; cation binding; pre-mRNA binding; metal ion binding; miRNA…	K13187			IPR000504; IPR012677; IPR001878;	RNA recognition motif domain; Nucleotide-binding alpha-beta plait domain; Zinc finger, CCHC-type;	AR	KOG0109	RNA-binding protein LARK, contains RRM and retroviral-type Zn-finger domains
Q8IWS0	PHD finger protein 6 OS=Homo sapiens OX=9606 GN=PHF6 PE=1 SV=1	1.624	Up	0.00027984	PHF6	41.29	0.829	0.82	0.701	0.791	0.715	0.928	0.625	0.583	1.389	1.447	0.929	1.136	1.342	1.607	0.832	1.052	nucleus	regulation of cellular process; cellular aromatic compound metabolic process; nucleic acid-templated transcription; regulation of macromolecule metabolic process; regulation of nucleobase-containing compound metabolic process; biosynthetic process; cellular metabolic process; organic substance metabolic process; regulation of RNA biosynthetic process; metabolic process; heterocycle metabolic proc…	intracellular organelle; intracellular non-membrane-bounded organelle; condensed chromosome, centromeric region; intracellular organelle part; macromolecular complex; nuclear lumen; intracellular part; nucleolus; cell; condensed chromosome kinetochore; organelle part; chromosomal part; non-membrane-bounded organelle; chromosomal region; condensed chromosome; organelle; intracellular membrane-boun…	histone binding; DNA binding; RNA binding; macromolecular complex binding; ion binding; tubulin binding; scaffold protein binding; protein binding; zinc ion binding; phosphoprotein binding; heterocyclic compound binding; organic cyclic compound binding; histone deacetylase binding; cytoskeletal protein binding; transition metal ion binding; binding; nucleic acid binding; metal ion binding; cation…				IPR001965; IPR013083;	Zinc finger, PHD-type; Zinc finger, RING/FYVE/PHD-type;	K	KOG1084	Transcription factor TCF20
P07858	Cathepsin B OS=Homo sapiens OX=9606 GN=CTSB PE=1 SV=3	1.552	Up	0.0078357	CTSB	37.821	0.707	0.774	0.77	0.675	0.812	0.855	0.883	0.863	0.854	2.055	0.933	1.085	1.567	0.867	1.287	1.189	extracellular	entry into host; single organism signaling; regulation of cell death; leukocyte activation; reproductive process; regulation of defense response; cellular metabolic process; decidualization; metabolic process; single organism reproductive process; multi-multicellular organism process; response to endogenous stimulus; protein metabolic process; macromolecule metabolic process; interspecies interac…	extracellular space; extracellular region part; cytoplasmic vesicle; cytoplasm; vesicle; endolysosome lumen; cytoplasmic vesicle part; intracellular part; endolysosome; cell; ficolin-1-rich granule lumen; organelle part; pigment granule; non-membrane-bounded organelle; vacuolar lumen; extracellular exosome; ficolin-1-rich granule; membrane-enclosed lumen; intracellular organelle lumen; intracellu…	peptidase activity; macromolecular complex binding; serine-type peptidase activity; proteoglycan binding; hydrolase activity; protein binding; cysteine-type peptidase activity; endopeptidase activity; serine-type endopeptidase activity; carbohydrate derivative binding; catalytic activity; serine hydrolase activity; binding; peptidase activity, acting on L-amino acid peptides; collagen binding; cy…	K01363	CTSB; cathepsin B [EC:3.4.22.1]	hsa04142 Lysosome; hsa04924 Renin secretion; hsa04612 Antigen processing and presentation; hsa04210 Apoptosis; hsa04140 Autophagy - animal; hsa04621 NOD-like receptor signaling pathway;	IPR000668; IPR012599;	Peptidase C1A, papain C-terminal; Peptidase C1A, propeptide;	O	KOG1543	Cysteine proteinase Cathepsin L
Q9NQ66	"""1-phosphatidylinositol 4,5-bisphosphate phosphodiesterase beta-1 OS=Homo sapiens OX=9606 GN=PLCB1 PE=1 SV=1"""	0.602	Down	0.0061762	PLCB1	138.57					1.532	1.175	1.069	1.661					0.801	0.81	0.714	0.949	nucleus	single organism signaling; regulation of stress-activated MAPK cascade; reproductive process; alcohol metabolic process; positive regulation of biosynthetic process; cellular lipid metabolic process; response to interleukin-1; cellular metabolic process; regulation of cell cycle process; positive regulation of growth; metabolic process; positive regulation of molecular function; regulation of mit…	membrane; extracellular region part; organelle membrane; vesicle; cytoplasm; intracellular part; nuclear body; cell; organelle part; chromosomal part; non-membrane-bounded organelle; membrane-enclosed lumen; extracellular exosome; nucleoplasm; nuclear membrane; intracellular organelle lumen; nuclear chromosome part; nuclear speck; myelin sheath; intracellular; cell part; chromosome; nuclear chrom…	nucleoside-triphosphatase regulator activity; lamin binding; GTPase regulator activity; protein dimerization activity; protein binding; hydrolase activity; molecular function regulator; signal transducer activity; phosphatidylinositol bisphosphate binding; identical protein binding; catalytic activity; binding; phosphatidylinositol-4,5-bisphosphate binding; phosphatidylinositol binding; phospholi…	K05858	PLCB; phosphatidylinositol phospholipase C, beta [EC:3.1.4.11]	hsa04072 Phospholipase D signaling pathway; hsa04015 Rap1 signaling pathway; hsa04723 Retrograde endocannabinoid signaling; hsa01100 Metabolic pathways; hsa04022 cGMP-PKG signaling pathway; hsa04924 Renin secretion; hsa04911 Insulin secretion; hsa04970 Salivary secretion; hsa04724 Glutamatergic synapse; hsa00562 Inositol phosphate metabolism; hsa05200 Pathways in cancer; hsa04071 Sphingolipid sig…	IPR000909; IPR015359; IPR011992; IPR001711; IPR017946; IPR011993; IPR000008; IPR014815;	Phosphatidylinositol-specific phospholipase C, X domain; Phosphoinositide-specific phospholipase C, EF-hand-like domain; EF-hand domain pair; Phospholipase C, phosphatidylinositol-specific, Y domain; PLC-like phosphodiesterase, TIM beta/alpha-barrel domain; PH domain-like; C2 domain; Phospholipase C-beta, C-terminal domain;	I	KOG1265	Phospholipase C
Q9NWS0	PIH1 domain-containing protein 1 OS=Homo sapiens OX=9606 GN=PIH1D1 PE=1 SV=1	1.534	Up	0.00041692	PIH1D1	32.363	0.965	0.84	0.632	0.899	0.678	0.651	0.725	0.877	1.287	1.533	0.805	1.038	1.127	1.451	1.233	1.142	cytoplasm	cellular component biogenesis; ribonucleoprotein complex biogenesis; regulation of cell death; regulation of biological quality; positive regulation of cellular protein metabolic process; ribonucleoprotein complex assembly; nucleic acid-templated transcription; positive regulation of biosynthetic process; regulation of histone H3-K9 trimethylation; cellular metabolic process; positive regulation …	intracellular organelle; intracellular non-membrane-bounded organelle; intracellular organelle part; cytoplasm; macromolecular complex; nuclear lumen; intracellular part; nucleolus; cell; organelle part; pre-snoRNP complex; non-membrane-bounded organelle; organelle; intracellular membrane-bounded organelle; membrane-enclosed lumen; nucleus; intracellular organelle lumen; intracellular; cell part;…	histone binding; DNA binding; transcription regulatory region sequence-specific DNA binding; ATPase binding; double-stranded DNA binding; sequence-specific double-stranded DNA binding; protein kinase binding; RNA polymerase I CORE element sequence-specific DNA binding; protein binding; RNA polymerase I regulatory region sequence-specific DNA binding; sequence-specific DNA binding; kinase binding;…						S	KOG4356	Uncharacterized conserved protein
P27708	CAD protein OS=Homo sapiens OX=9606 GN=CAD PE=1 SV=3	1.522	Up	0.00125855	CAD	242.98	0.768	0.772	0.749	0.795	0.819	0.799	0.807	0.778	1.294	1.583	0.85	1.052	1.218	1.417	0.901	1.251	cytoplasm	regulation of biological quality; nucleoside metabolic process; gland development; citrulline biosynthetic process; reproductive process; pyrimidine nucleoside triphosphate metabolic process; nucleoside biosynthetic process; cellular metabolic process; response to external stimulus; ribose phosphate biosynthetic process; metabolic process; heart development; response to cortisol; carbohydrate der…	membrane; extracellular region part; vesicle; cytoplasm; neuronal cell body; macromolecular complex; intracellular part; cell; axon terminus; organelle part; membrane-enclosed lumen; extracellular exosome; nucleoplasm; intracellular organelle lumen; presynapse; intracellular; cell part; extracellular vesicle; neuron projection; neuron projection terminus; membrane-bounded organelle; neuron part; …	amino acid binding; nucleoside phosphate binding; phosphotransferase activity, alcohol group as acceptor; aspartate binding; ligase activity; hydrolase activity, acting on carbon-nitrogen (but not peptide) bonds, in cyclic amides; protein binding; hydrolase activity; protein kinase activity; heterocyclic compound binding; organic cyclic compound binding; carboxyl- or carbamoyltransferase activity…	K11540	CAD; carbamoyl-phosphate synthase / aspartate carbamoyltransferase / dihydroorotase [EC:6.3.5.5 2.1.3.2 3.5.2.3]	hsa00240 Pyrimidine metabolism; hsa01100 Metabolic pathways; hsa00250 Alanine, aspartate and glutamate metabolism;	IPR006132; IPR032466; IPR005479; IPR006680; IPR006131; IPR011607; IPR029062; IPR013815; IPR011059; IPR016185; IPR005480; IPR002474; IPR011761; IPR013816; IPR005483; IPR017926;	Aspartate/ornithine carbamoyltransferase, carbamoyl-P binding; Metal-dependent hydrolase; Carbamoyl-phosphate synthetase large subunit-like, ATP-binding domain; Amidohydrolase-related; Aspartate/ornithine carbamoyltransferase, Asp/Orn-binding domain; Methylglyoxal synthase-like domain; Class I glutamine amidotransferase-like; ATP-grasp fold, subdomain 1; Metal-dependent hydrolase, composite domai…	R	KOG0370	Multifunctional pyrimidine synthesis protein CAD (includes carbamoyl-phophate synthetase, aspartate transcarbamylase, and glutamine amidotransferase)
P08253	72 kDa type IV collagenase OS=Homo sapiens OX=9606 GN=MMP2 PE=1 SV=2	1.51	Up	0.0031617	MMP2	73.881	0.753	1.12	0.654	0.945	0.99	0.585	0.706	0.684	1.286	0.962	1.263	1.348	1.234	0.819	1.043	1.762	extracellular	single organism signaling; developmental maturation; cell surface receptor signaling pathway; reproductive process; embryo implantation; regulation of defense response; cellular metabolic process; endoderm development; angiogenesis; metabolic process; trabecula formation; multi-multicellular organism process; single organism reproductive process; response to endogenous stimulus; protein metabolic…	intracellular organelle; membrane; extracellular space; extracellular region part; intracellular non-membrane-bounded organelle; cell periphery; myofibril; cytoplasm; supramolecular fiber; intracellular part; supramolecular complex; cell; extracellular region; organelle part; mitochondrion; supramolecular polymer; plasma membrane; non-membrane-bounded organelle; extracellular matrix; intracellula…	metalloendopeptidase activity; peptidase activity; serine-type peptidase activity; ion binding; metallopeptidase activity; hydrolase activity; protein binding; zinc ion binding; endopeptidase activity; serine-type endopeptidase activity; transition metal ion binding; serine hydrolase activity; catalytic activity; binding; peptidase activity, acting on L-amino acid peptides; metal ion binding; cat…	K01398	MMP2; matrix metalloproteinase-2 (gelatinase A) [EC:3.4.24.24]	hsa05200 Pathways in cancer; hsa05219 Bladder cancer; hsa04912 GnRH signaling pathway; hsa04933 AGE-RAGE signaling pathway in diabetic complications; hsa05205 Proteoglycans in cancer; hsa04670 Leukocyte transendothelial migration; hsa05418 Fluid shear stress and atherosclerosis; hsa01522 Endocrine resistance; hsa04915 Estrogen signaling pathway;	IPR001818; IPR002477; IPR024079; IPR000585; IPR013806; IPR033739; IPR006026; IPR000562;	Peptidase M10, metallopeptidase; Peptidoglycan binding-like; Metallopeptidase, catalytic domain; Hemopexin-like domain; Kringle-like fold; Peptidase M10A, catalytic domain; Peptidase, metallopeptidase; Fibronectin, type II, collagen-binding;	OW	KOG1565	Gelatinase A and related matrix metalloproteases
Q15758	Neutral amino acid transporter B(0) OS=Homo sapiens OX=9606 GN=SLC1A5 PE=1 SV=2	1.601	Up	0.0029407	SLC1A5	56.598	0.737	0.812	0.732	0.806	0.633	0.798	0.676	0.739	1.601	0.955	0.909	1.556	1.281	1.436	1.02	0.743	plasma membrane	entry into host; serine transport; ion transmembrane transport; entry into cell of other organism involved in symbiotic interaction; viral life cycle; L-amino acid transport; single-organism process; multi-organism cellular process; anion transmembrane transport; establishment of localization; glutamine transport; single-organism localization; cation transport; organic acid transmembrane transpor…	intracellular vesicle; intracellular organelle; membrane; extracellular region part; intrinsic component of plasma membrane; cytoplasmic vesicle; cell periphery; melanosome; cytoplasm; vesicle; intrinsic component of membrane; intracellular part; integral component of plasma membrane; cell; extracellular region; integral component of membrane; plasma membrane; pigment granule; extracellular exoso…	organic acid transmembrane transporter activity; active transmembrane transporter activity; secondary active transmembrane transporter activity; L-serine transporter activity; ion transmembrane transporter activity; L-amino acid transmembrane transporter activity; symporter activity; serine transmembrane transporter activity; substrate-specific transporter activity; L-glutamine transmembrane tran…	K05616	SLC1A5; solute carrier family 1 (neutral amino acid transporter), member 5	hsa04974 Protein digestion and absorption; hsa05230 Central carbon metabolism in cancer;			E	KOG3787	Glutamate/aspartate and neutral amino acid transporters
Q9H6W3	Ribosomal oxygenase 1 OS=Homo sapiens OX=9606 GN=RIOX1 PE=1 SV=2	1.565	Up	0.00125987	RIOX1	71.085	0.89	0.443	0.561	0.714	0.847	0.958	0.819	1.036	1.162	1.437	1.236	1.526	1.32	1.156	0.938	1.034	nucleus	negative regulation of developmental process; nucleic acid-templated transcription; histone H3-K4 demethylation; histone demethylation; negative regulation of multicellular organismal process; single-organism process; biosynthetic process; negative regulation of osteoblast differentiation; negative regulation of RNA metabolic process; cellular metabolic process; peptidyl-arginine modification; pr…	intracellular organelle; intracellular non-membrane-bounded organelle; intracellular organelle part; nuclear lumen; intracellular part; nucleolus; cell; organelle part; non-membrane-bounded organelle; organelle; intracellular membrane-bounded organelle; membrane-enclosed lumen; nucleoplasm; nucleus; intracellular organelle lumen; cell part; intracellular; membrane-bounded organelle; organelle lum…	histone demethylase activity (H3-K4 specific); iron ion binding; ion binding; oxidoreductase activity, acting on paired donors, with incorporation or reduction of molecular oxygen; protein binding; oxidoreductase activity, acting on paired donors, with incorporation or reduction of molecular oxygen, 2-oxoglutarate as one donor, and incorporation of one atom each of oxygen into both donors; demeth…	K16914			IPR003347;	JmjC domain;	S	KOG3706	Uncharacterized conserved protein
Q05707	Collagen alpha-1(XIV) chain OS=Homo sapiens OX=9606 GN=COL14A1 PE=1 SV=3	0.398	Down	4.4993e-05	COL14A1	193.51	1.723	2.139	1.548	1.005	2.104	1.225	0.962	1.751	0.484	0.375	0.694	0.538	1.131	0.617	0.448	0.665	Golgi apparatus	cellular component organization; protein complex subunit organization; collagen fibril organization; cell-cell adhesion; single-organism cellular process; single-organism process; macromolecular complex subunit organization; biological adhesion; single organismal cell-cell adhesion; extracellular structure organization; single organism cell adhesion; cell adhesion; extracellular matrix organizati…	extracellular space; extracellular region part; endoplasmic reticulum; vesicle; cytoplasm; macromolecular complex; intracellular part; FACIT collagen trimer; cell; extracellular matrix component; collagen trimer; organelle part; extracellular exosome; membrane-enclosed lumen; collagen type XIV trimer; intracellular organelle lumen; cell part; intracellular; extracellular vesicle; anchoring collag…	organic cyclic compound binding; heterocyclic compound binding; extracellular matrix structural constituent; RNA binding; protein binding, bridging; binding; macromolecular complex binding; nucleic acid binding; collagen binding; binding, bridging; protein binding; structural molecule activity; protein complex binding;	K08133	COL14A; collagen, type XIV, alpha	hsa04974 Protein digestion and absorption;	IPR013783; IPR003961; IPR013320; IPR001791; IPR002035;	Immunoglobulin-like fold; Fibronectin type III; Concanavalin A-like lectin/glucanase domain; Laminin G domain; von Willebrand factor, type A;	W	KOG3544	Collagens (type IV and type XIII), and related proteins
P25774	Cathepsin S OS=Homo sapiens OX=9606 GN=CTSS PE=1 SV=3	1.696	Up	0.00115916	CTSS	37.495					0.884	0.683	0.716	0.703					1.432	1.374	1.201	1.056	extracellular	single organism signaling; leukocyte activation; regulation of defense response; cellular metabolic process; basement membrane organization; metabolic process; regulation of localization; positive regulation of molecular function; positive regulation of ion transmembrane transporter activity; response to endogenous stimulus; protein metabolic process; macromolecule metabolic process; multicellula…	tertiary granule lumen; extracellular space; extracellular region part; cytoplasmic vesicle; cytoplasm; vesicle; endolysosome lumen; cytoplasmic vesicle part; intracellular part; endolysosome; cell; ficolin-1-rich granule lumen; organelle part; vacuolar lumen; ficolin-1-rich granule; membrane-enclosed lumen; intracellular organelle lumen; intracellular; cell part; lysosome; secretory vesicle; end…	peptidase activity; fibronectin binding; serine-type peptidase activity; proteoglycan binding; macromolecular complex binding; hydrolase activity; cysteine-type peptidase activity; protein binding; extracellular matrix binding; serine-type endopeptidase activity; endopeptidase activity; carbohydrate derivative binding; laminin binding; serine hydrolase activity; catalytic activity; binding; pepti…	K01368	CTSS; cathepsin S [EC:3.4.22.27]	hsa04142 Lysosome; hsa05152 Tuberculosis; hsa04612 Antigen processing and presentation; hsa04210 Apoptosis; hsa04145 Phagosome;	IPR013201; IPR000668;	Cathepsin propeptide inhibitor domain (I29); Peptidase C1A, papain C-terminal;	O	KOG1543	Cysteine proteinase Cathepsin L
Q6UXI9	Nephronectin OS=Homo sapiens OX=9606 GN=NPNT PE=2 SV=3	0.482	Down	0.04538	NPNT	61.906					1	0.889	2.6	1.541					0.866	0.594	0.772	0.676	extracellular	nephron morphogenesis; positive regulation of cellular protein metabolic process; renal tubule morphogenesis; nephron tubule development; positive regulation of biosynthetic process; positive regulation of muscle contraction; reflex; cellular response to cytokine stimulus; branching morphogenesis of an epithelial tube; biological adhesion; response to external stimulus; positive regulation of tra…	membrane; protein complex involved in cell adhesion; extracellular space; extracellular region part; cell periphery; membrane protein complex; cytoplasm; vesicle; macromolecular complex; intrinsic component of membrane; intracellular part; supramolecular fiber; integral component of plasma membrane; supramolecular complex; cell; extracellular matrix component; organelle part; non-membrane-bounded…	cell adhesion molecule binding; receptor binding; binding; ion binding; macromolecular complex binding; cation binding; metal ion binding; protein binding; integrin binding; calcium ion binding; protein complex binding;	K06824			IPR000998; IPR001881; IPR000742; IPR013320; IPR009030;	MAM domain; EGF-like calcium-binding domain; EGF-like domain; Concanavalin A-like lectin/glucanase domain; Growth factor receptor cysteine-rich domain;	T	KOG1217	Fibrillins and related proteins containing Ca2+-binding EGF-like domains
O43823	A-kinase anchor protein 8 OS=Homo sapiens OX=9606 GN=AKAP8 PE=1 SV=1	1.848	Up	0.00032261	AKAP8	76.107	0.649	0.646	0.649	0.772	0.592	0.744	0.68	0.73	1.109	1.852	0.973	1.203	1.092	1.83	1.038	0.996	nucleus	single organism signaling; positive regulation of cellular protein metabolic process; regulation of tumor necrosis factor production; nucleic acid-templated transcription; cellular metabolic process; protein transport; response to biotic stimulus; positive regulation of chromatin organization; regulation of histone phosphorylation; response to external stimulus; metabolic process; response to end…	membrane; cytoplasm; intracellular part; cell; organelle part; non-membrane-bounded organelle; membrane-enclosed lumen; condensed chromosome; nucleoplasm; intracellular organelle lumen; intracellular; cell part; chromosome; female pronucleus; membrane-bounded organelle; organelle lumen; pronucleus; intracellular organelle; intracellular non-membrane-bounded organelle; intracellular organelle part…	protein kinase A binding; RNA binding; DNA binding; protein kinase A regulatory subunit binding; double-stranded DNA binding; ion binding; protein binding; zinc ion binding; heterocyclic compound binding; organic cyclic compound binding; histone deacetylase binding; transition metal ion binding; binding; nucleic acid binding; metal ion binding; cation binding; NF-kappaB binding; transcription fac…	K16525
Q8TD16	Protein bicaudal D homolog 2 OS=Homo sapiens OX=9606 GN=BICD2 PE=1 SV=1	1.502	Up	0.0035628	BICD2	93.532	0.7	0.673	0.712	0.915	0.745	0.768	1.107	0.817	1.113	1.303	1.259	1.35	0.913	0.706	1.671	1.352	nucleus	organelle transport along microtubule; organelle localization; RNA transport; intracellular transport; cellular component organization; establishment of protein localization to organelle; microtubule anchoring; mRNA transport; Golgi vesicle transport; single-organism process; cytoskeleton-dependent intracellular transport; microtubule-based transport; protein transport; establishment of RNA local…	membrane; nuclear outer membrane-endoplasmic reticulum membrane network; cytoplasmic vesicle; cell periphery; cytoplasm; vesicle; macromolecular complex; intracellular part; cell; organelle part; non-membrane-bounded organelle; cytoskeleton; annulate lamellae; membrane part; cell part; intracellular; whole membrane; membrane region; membrane-bounded organelle; intracellular organelle; intracellul…	dynein light intermediate chain binding; small GTPase binding; dynein complex binding; dynactin binding; cytoskeletal protein binding; Ras GTPase binding; binding; macromolecular complex binding; protein binding; GTPase binding; Rab GTPase binding; enzyme binding; protein complex binding;	K18739					U	KOG0999	Microtubule-associated protein Bicaudal-D
P04114	Apolipoprotein B-100 OS=Homo sapiens OX=9606 GN=APOB PE=1 SV=2	0.592	Down	5.5405e-05	APOB	515.6	1.545	1.135	1.228	1.056	1.706	1.48	1.363	1.166	1.088	0.816	0.759	0.689	0.978	0.669	0.726	0.6	endoplasmic reticulum	single organism signaling; cellular component biogenesis; positive regulation of macrophage derived foam cell differentiation; regulation of biological quality; reproductive process; alcohol metabolic process; chordate embryonic development; very-low-density lipoprotein particle assembly; cellular lipid metabolic process; positive regulation of cholesterol storage; regulation of lipid metabolic p…	membrane; extracellular region part; clathrin-coated endocytic vesicle; organelle membrane; low-density lipoprotein particle; cytoplasm; cytoplasmic vesicle part; triglyceride-rich plasma lipoprotein particle; neuronal cell body; macromolecular complex; cell; very-low-density lipoprotein particle; organelle part; early endosome; vacuolar lumen; chylomicron remnant; extracellular exosome; clathrin…	lipase binding; receptor binding; ion binding; lipid transporter activity; substrate-specific transporter activity; protein binding; heparin binding; sulfur compound binding; lipoprotein particle receptor binding; carbohydrate derivative binding; cholesterol transporter activity; binding; phospholipid binding; sterol transporter activity; lipid binding; anion binding; glycosaminoglycan binding; l…	K14462	APOB; apolipoprotein B	hsa04975 Fat digestion and absorption; hsa04977 Vitamin digestion and absorption;	IPR011030; IPR015818; IPR015817; IPR001747; IPR022176; IPR015816; IPR015819; IPR016024; IPR015255; IPR009454;	Vitellinogen, superhelical; Vitellinogen, open beta-sheet, subdomain 2; Vitellinogen, open beta-sheet, subdomain 1; Lipid transport protein, N-terminal; Apolipoprotein B100 C-terminal; Vitellinogen, beta-sheet N-terminal; Lipid transport protein, beta-sheet shell; Armadillo-type fold; Vitellinogen, open beta-sheet; Lipid transport, open beta-sheet;	I	KOG4338	Predicted lipoprotein
P78539	Sushi repeat-containing protein SRPX OS=Homo sapiens OX=9606 GN=SRPX PE=1 SV=1	0.31	Down	0.0023408	SRPX	51.571	1.168	2.477	1.024	1.91					0.624	0.487	0.431	0.498					extracellular	cellular component biogenesis; regulation of cell death; regulation of signaling; single-organism process; phagolysosome assembly; autophagy; cellular metabolic process; positive regulation of extrinsic apoptotic signaling pathway; negative regulation of cell proliferation; establishment of localization; phagocytosis; regulation of apoptotic signaling pathway; biological adhesion; metabolic proce…	intracellular organelle; membrane; endoplasmic reticulum; cytoplasm; endomembrane system; intracellular part; cell; autophagosome; intracellular membrane-bounded organelle; organelle; intracellular; cell part; vacuole; cell surface; membrane-bounded organelle; cytoplasmic part;					IPR000436; IPR003410; IPR025232;	Sushi/SCR/CCP domain; HYR domain; Domain of unknown function DUF4174;	TV	KOG4297	C-type lectin
Q9NUQ9	Protein FAM49B OS=Homo sapiens OX=9606 GN=FAM49B PE=1 SV=1	1.526	Up	2.675e-06	FAM49B	36.748	0.925	0.767	0.71	0.911	0.794	0.755	0.756	0.706	1.476	1.234	0.995	1.045	1.268	1.31	1.076	1.248	cytoplasm	transport; regulated exocytosis; single-organism localization; secretion by cell; vesicle-mediated transport; single-organism cellular process; single-organism process; platelet degranulation; localization; cellular process; exocytosis; establishment of localization; single-organism transport; secretion;	membrane; secretory granule lumen; extracellular region part; cytoplasmic vesicle; cytoplasm; vesicle; cytoplasmic vesicle part; intracellular part; cell; organelle part; membrane-enclosed lumen; extracellular exosome; vesicle lumen; intracellular organelle lumen; cell part; intracellular; secretory vesicle; extracellular vesicle; secretory granule; membrane-bounded organelle; organelle lumen; ci…	protein binding; binding;						S	KOG3951	Uncharacterized conserved protein
P24752	"""Acetyl-CoA acetyltransferase, mitochondrial OS=Homo sapiens OX=9606 GN=ACAT1 PE=1 SV=1"""	0.647	Down	4.9715e-07	ACAT1	45.199	1.273	1.315	1.313	1.117	1.443	1.473	1.137	1.209	0.809	0.748	0.923	0.807	0.795	1.034	0.755	0.776	mitochondria	cellular component biogenesis; nucleoside metabolic process; gland development; nephron tubule development; brain development; cellular lipid metabolic process; nucleoside biosynthetic process; purine ribonucleoside biosynthetic process; cellular metabolic process; sulfur compound biosynthetic process; response to external stimulus; ribose phosphate biosynthetic process; metanephric proximal conv…	membrane; extracellular region part; organelle membrane; cytoplasm; vesicle; intracellular part; cell; organelle part; membrane-enclosed lumen; mitochondrial envelope; extracellular exosome; intracellular organelle lumen; intracellular; cell part; organelle inner membrane; extracellular vesicle; membrane-bounded organelle; mitochondrial inner membrane; organelle lumen; intracellular organelle; mi…	ligase activity, forming carbon-carbon bonds; ion binding; protein dimerization activity; ligase activity; lyase activity; protein binding; cofactor binding; transferase activity, transferring acyl groups other than amino-acyl groups; acetyltransferase activity; transferase activity, transferring acyl groups; identical protein binding; catalytic activity; protein homodimerization activity; carbon…	K00626	E2.3.1.9; acetyl-CoA C-acetyltransferase [EC:2.3.1.9]	hsa00280 Valine, leucine and isoleucine degradation; hsa00310 Lysine degradation; hsa00640 Propanoate metabolism; hsa00620 Pyruvate metabolism; hsa01100 Metabolic pathways; hsa00900 Terpenoid backbone biosynthesis; hsa01212 Fatty acid metabolism; hsa01200 Carbon metabolism; hsa00630 Glyoxylate and dicarboxylate metabolism; hsa04975 Fat digestion and absorption; hsa00071 Fatty acid degradation; hs…	IPR016039; IPR020616; IPR020617;	Thiolase-like; Thiolase, N-terminal; Thiolase, C-terminal;	I	KOG1390	Acetyl-CoA acetyltransferase
Q9ULZ3	Apoptosis-associated speck-like protein containing a CARD OS=Homo sapiens OX=9606 GN=PYCARD PE=1 SV=2	1.523	Up	0.0139572	PYCARD	21.627	0.84	0.754	0.74	0.851	0.701	0.888	0.761	0.795	0.939	0.963	1.041	2.051	1.183	0.799	1.006	1.658	nucleus	single organism signaling; regulation of leukocyte activation; regulation of cell death; regulation of stress-activated MAPK cascade; regulation of tumor necrosis factor production; defense response to other organism; regulation of antigen processing and presentation of peptide antigen via MHC class II; response to interleukin-1; regulation of defense response; regulation of mitochondrion organiz…	secretory granule lumen; endoplasmic reticulum; transferase complex, transferring phosphorus-containing groups; cytoplasmic vesicle; vesicle; cytoplasm; cytoplasmic vesicle part; IkappaB kinase complex; macromolecular complex; NLRP3 inflammasome complex; intracellular part; azurophil granule lumen; inflammasome complex; serine/threonine protein kinase complex; NLRP1 inflammasome complex; cell; pr…	peptidase activity; receptor binding; peptidase regulator activity; cysteine-type endopeptidase regulator activity involved in apoptotic process; protein dimerization activity; BMP receptor binding; peptidase activator activity; cysteine-type peptidase activity; hydrolase activity; protein binding; molecular function regulator; myosin I binding; receptor serine/threonine kinase binding; cytoskele…	K12799	PYCARD; apoptosis-associated speck-like protein containing a CARD	hsa04623 Cytosolic DNA-sensing pathway; hsa05134 Legionellosis; hsa05133 Pertussis; hsa05132 Salmonella infection; hsa04621 NOD-like receptor signaling pathway; hsa05164 Influenza A;	IPR004020; IPR011029; IPR033516; IPR001315;	DAPIN domain; Death-like domain; CARD8/ASC/NALP1, CARD domain; CARD domain;
Q9H6T3	RNA polymerase II-associated protein 3 OS=Homo sapiens OX=9606 GN=RPAP3 PE=1 SV=2	1.657	Up	2.3498e-05	RPAP3	75.718	0.874	0.771	0.743	0.783	0.813	0.669	0.6	0.661	1.164	1.657	0.883	1.062	1.318	1.433	1.118	1.164	nucleus		macromolecular complex; protein complex; R2TP complex;	protein binding; binding;				IPR025986; IPR011990; IPR013026;	RNA-polymerase II-associated protein 3-like, C-terminal domain; Tetratricopeptide-like helical domain; Tetratricopeptide repeat-containing domain;	S	KOG4648	Uncharacterized conserved protein, contains LRR repeats
P78527	DNA-dependent protein kinase catalytic subunit OS=Homo sapiens OX=9606 GN=PRKDC PE=1 SV=3	1.633	Up	1.98257e-05	PRKDC	469.08	0.866	0.803	0.748	0.859	0.626	0.718	0.705	0.649	1.436	1.255	1.157	0.929	1.225	1.586	0.965	1.202	cytoplasm	single organism signaling; regulation of cell death; negative regulation of cell cycle G1/S phase transition; gland development; regulation of cell aging; reproductive process; segmentation; chordate embryonic development; negative regulation of immune effector process; positive regulation of biosynthetic process; regulation of cell cycle process; cellular metabolic process; positive regulation o…	membrane; nonhomologous end joining complex; nuclear chromosome, telomeric region; chromosome, telomeric region; extracellular region part; cytoplasm; macromolecular complex; intracellular part; cell; organelle part; chromosomal part; non-membrane-bounded organelle; membrane-enclosed lumen; nucleoplasm; intracellular organelle lumen; nuclear chromosome part; intracellular; cell part; chromosome; …	DNA-dependent protein kinase activity; nucleoside phosphate binding; phosphotransferase activity, alcohol group as acceptor; double-stranded DNA binding; protein binding; protein kinase activity; heterocyclic compound binding; organic cyclic compound binding; kinase activity; ribonucleotide binding; catalytic activity; binding; purine ribonucleoside binding; anion binding; adenyl ribonucleotide b…	K06642	PRKDC; DNA-dependent protein kinase catalytic subunit [EC:2.7.11.1]	hsa03450 Non-homologous end-joining; hsa04110 Cell cycle;	IPR000403; IPR011989; IPR011009; IPR012582; IPR003151; IPR014009; IPR016024; IPR003152;	Phosphatidylinositol 3-/4-kinase, catalytic domain; Armadillo-like helical; Protein kinase-like domain; NUC194; PIK-related kinase, FAT; PIK-related kinase; Armadillo-type fold; FATC domain;	L	KOG0891	DNA-dependent protein kinase
O96015	"""Dynein light chain 4, axonemal OS=Homo sapiens OX=9606 GN=DNAL4 PE=1 SV=1"""	0.63	Down	0.00191646	DNAL4	12.009					1.542	1.308	1.145	1.25					0.702	0.849	0.806	0.946	extracellular	single-organism cellular process; microtubule-based movement; movement of cell or subcellular component; single-organism process; cellular process; microtubule-based process;	membrane; intracellular organelle; cilium; polymeric cytoskeletal fiber; cell projection; microtubule; intracellular non-membrane-bounded organelle; cell periphery; cytoskeletal part; cytoplasm; intracellular organelle part; macromolecular complex; supramolecular fiber; intracellular part; microtubule associated complex; dynein complex; supramolecular complex; cell; organelle part; plasma membran…	motor activity; pyrophosphatase activity; catalytic activity; binding; hydrolase activity, acting on acid anhydrides; protein binding; hydrolase activity; microtubule motor activity; hydrolase activity, acting on acid anhydrides, in phosphorus-containing anhydrides; nucleoside-triphosphatase activity;	K10412	DNAL4; dynein light chain 4, axonemal	hsa05016 Huntington's disease;			Z	KOG3430	Dynein light chain type 1
P11532	Dystrophin OS=Homo sapiens OX=9606 GN=DMD PE=1 SV=3	0.438	Down	4.4728e-05	DMD	426.74	0.952	1.163	2.097	1.434	2.292	1.342	1.161	1.724	0.573	0.565	1.002	0.705	0.785	0.582	0.426	0.69	nucleus	cellular component biogenesis; single organism signaling; regulation of biological quality; peptide metabolic process; cilium assembly; cellular metabolic process; cilium organization; regulation of receptor activity; muscle attachment; response to external stimulus; metabolic process; positive regulation of multicellular organismal process; macromolecular complex assembly; regulation of localiza…	membrane; membrane microdomain; cell periphery; membrane protein complex; cell junction; myofibril; cytoplasm; macromolecular complex; supramolecular fiber; intracellular part; Z disc; actin-based cell projection; supramolecular complex; cell; I band; organelle part; syntrophin complex; non-membrane-bounded organelle; cytoskeleton; plasma membrane region; membrane part; intracellular; cell part; …	dystroglycan binding; ion binding; nitric-oxide synthase binding; protein binding; zinc ion binding; structural constituent of muscle; carbohydrate derivative binding; cytoskeletal protein binding; transition metal ion binding; structural constituent of cytoskeleton; vinculin binding; binding; actin binding; metal ion binding; cation binding; myosin binding; glycoprotein binding; structural molec…	K10366	DMD; dystrophin	hsa05414 Dilated cardiomyopathy; hsa05412 Arrhythmogenic right ventricular cardiomyopathy (ARVC); hsa05416 Viral myocarditis; hsa05410 Hypertrophic cardiomyopathy (HCM);	IPR015154; IPR001202; IPR001715; IPR011992; IPR015153; IPR000433;	EF-hand domain, type 2; WW domain; Calponin homology domain; EF-hand domain pair; EF-hand domain, type 1; Zinc finger, ZZ-type;	NTZ	KOG4286	Dystrophin-like protein
Q92820	Gamma-glutamyl hydrolase OS=Homo sapiens OX=9606 GN=GGH PE=1 SV=2	1.506	Up	0.00157632	GGH	35.964	0.989	0.779	0.934	0.77	0.575	0.704	0.569	0.852	1.316	0.961	1.066	1.147	1.209	1.71	0.86	1.024	extracellular	leukocyte activation; single-organism process; cellular metabolic process; establishment of localization; metabolic process; cellular amino acid metabolic process; response to endogenous stimulus; macromolecule metabolic process; protein metabolic process; response to inorganic substance; response to peptide; myeloid leukocyte activation; single-organism transport; secretion; leukocyte mediated i…	secretory granule lumen; tertiary granule lumen; extracellular space; extracellular region part; cytoplasmic vesicle; cytoplasm; vesicle; cytoplasmic vesicle part; intracellular part; azurophil granule lumen; cell; organelle part; pigment granule; vacuolar lumen; extracellular exosome; membrane-enclosed lumen; vesicle lumen; intracellular organelle lumen; intracellular; cell part; lysosome; secre…	peptidase activity, acting on L-amino acid peptides; exopeptidase activity; hydrolase activity; peptidase activity; gamma-glutamyl-peptidase activity; catalytic activity; omega peptidase activity;	K01307	GGH; gamma-glutamyl hydrolase [EC:3.4.19.9]	hsa01523 Antifolate resistance; hsa00790 Folate biosynthesis;	IPR029062;	Class I glutamine amidotransferase-like;	H	KOG1559	Gamma-glutamyl hydrolase
Q8IWU6	Extracellular sulfatase Sulf-1 OS=Homo sapiens OX=9606 GN=SULF1 PE=1 SV=1	1.518	Up	0.048458	SULF1	101.03	0.651	1.032	0.553	0.966					1.383	1.263	0.913	1.303					endoplasmic reticulum	single organism signaling; heparan sulfate proteoglycan metabolic process; cell surface receptor signaling pathway; positive regulation of BMP signaling pathway; chordate embryonic development; glial cell-derived neurotrophic factor receptor signaling pathway; cellular metabolic process; negative regulation of cell proliferation; positive regulation of transmembrane receptor protein serine/threon…	membrane; intracellular organelle; extracellular space; extracellular region part; endoplasmic reticulum; cell periphery; membrane microdomain; intracellular organelle part; cytoplasm; Golgi stack; endomembrane system; intracellular part; cell; extracellular region; organelle part; plasma membrane; intracellular membrane-bounded organelle; organelle; membrane part; intracellular; cell part; whole…	arylsulfatase activity; sulfuric ester hydrolase activity; N-acetylglucosamine-6-sulfatase activity; catalytic activity; binding; ion binding; hydrolase activity, acting on ester bonds; cation binding; metal ion binding; hydrolase activity; calcium ion binding;	K14607			IPR017849; IPR024609; IPR000917; IPR017850;	Alkaline phosphatase-like, alpha/beta/alpha; Extracellular sulfatase, C-terminal; Sulfatase, N-terminal; Alkaline-phosphatase-like, core domain;	G	KOG3731	Sulfatases
P08238	Heat shock protein HSP 90-beta OS=Homo sapiens OX=9606 GN=HSP90AB1 PE=1 SV=4	1.514	Up	0.0039015	HSP90AB1	83.263	0.843	0.808	0.762	0.766	0.808	0.722	0.779	0.73	1.087	1.726	0.876	0.952	1.103	1.653	0.984	1.03	cytoplasm	single organism signaling; cellular component biogenesis; regulation of cell death; reproductive process; regulation of neuron apoptotic process; positive regulation of biosynthetic process; regulation of defense response; cellular metabolic process; regulation of cell cycle process; regulation of protein serine/threonine kinase activity; metabolic process; macromolecular complex assembly; regula…	membrane; cluster of actin-based cell projections; extracellular region part; organelle membrane; cytoplasm; cytoplasmic vesicle part; macromolecular complex; sperm plasma membrane; cell; ficolin-1-rich granule lumen; organelle part; lysosomal membrane; extracellular exosome; ficolin-1-rich granule; nucleoplasm; plasma membrane region; intracellular; lysosome; secretory vesicle; membrane-bounded …	pyrimidine nucleoside binding; organic cyclic compound binding; histone deacetylase binding; ribonucleotide binding; binding; purine ribonucleoside binding; anion binding; adenyl ribonucleotide binding; adenyl nucleotide binding; pyrimidine nucleotide binding; purine ribonucleoside triphosphate binding; pyrimidine ribonucleotide binding; ATP binding; double-stranded RNA binding; nucleoside bindin…	K04079	HSP90A; molecular chaperone HtpG	hsa05200 Pathways in cancer; hsa04657 IL-17 signaling pathway; hsa04659 Th17 cell differentiation; hsa04621 NOD-like receptor signaling pathway; hsa04151 PI3K-Akt signaling pathway; hsa05418 Fluid shear stress and atherosclerosis; hsa04612 Antigen processing and presentation; hsa05215 Prostate cancer; hsa04141 Protein processing in endoplasmic reticulum; hsa04914 Progesterone-mediated oocyte matu…	IPR020575; IPR020568; IPR003594;	Heat shock protein Hsp90, N-terminal; Ribosomal protein S5 domain 2-type fold; Histidine kinase-like ATPase, C-terminal domain;	O	KOG0019	Molecular chaperone (HSP90 family)
P35610	Sterol O-acyltransferase 1 OS=Homo sapiens OX=9606 GN=SOAT1 PE=1 SV=3	2.229	Up	0.00196497	SOAT1	64.734	0.64	1.03	0.395	0.472	0.601	0.507	0.555	0.494	1.069	2.403	0.485	1.085	1.77	1.55	0.947	1.153	plasma membrane	cellular component biogenesis; organic hydroxy compound transport; regulation of biological quality; cholesterol efflux; cholesterol transport; alcohol metabolic process; cellular developmental process; positive regulation of biosynthetic process; very-low-density lipoprotein particle assembly; single-organism process; cellular lipid metabolic process; cellular metabolic process; establishment of…	intracellular organelle; membrane; nuclear outer membrane-endoplasmic reticulum membrane network; endoplasmic reticulum; intracellular organelle part; cytoplasm; intrinsic component of membrane; endomembrane system; intracellular part; cell; integral component of membrane; organelle part; intracellular membrane-bounded organelle; organelle; endoplasmic reticulum part; intracellular; cell part; me…	cholesterol binding; sterol binding; ion binding; protein binding; transferase activity, transferring acyl groups other than amino-acyl groups; sulfur compound binding; cofactor binding; steroid binding; organic cyclic compound binding; transferase activity, transferring acyl groups; catalytic activity; fatty-acyl-CoA binding; alcohol binding; binding; sterol O-acyltransferase activity; lipid bin…	K00637	SOAT; sterol O-acyltransferase [EC:2.3.1.26]	hsa00100 Steroid biosynthesis;			I	KOG0380	Sterol O-acyltransferase/Diacylglycerol O-acyltransferase
P30260	Cell division cycle protein 27 homolog OS=Homo sapiens OX=9606 GN=CDC27 PE=1 SV=2	1.863	Up	0.025199	CDC27	91.866	0.752	0.549	0.776	0.639					0.886	2.012	1.108	1.053					nucleus	positive regulation of cellular protein metabolic process; positive regulation of ubiquitin-protein transferase activity; regulation of cell cycle process; cellular metabolic process; positive regulation of cellular protein catabolic process; metabolic process; metaphase/anaphase transition of mitotic cell cycle; positive regulation of molecular function; regulation of mitotic cell cycle phase tr…	cytoplasm; macromolecular complex; intracellular part; cell; organelle part; non-membrane-bounded organelle; membrane-enclosed lumen; cytoskeleton; catalytic complex; microtubule organizing center; nucleoplasm; intracellular organelle lumen; microtubule cytoskeleton; intracellular; cell part; anaphase-promoting complex; ubiquitin ligase complex; membrane-bounded organelle; organelle lumen; intrac…	protein binding; phosphatase binding; protein phosphatase binding; binding; enzyme binding;	K03350	APC3; anaphase-promoting complex subunit 3	hsa04110 Cell cycle; hsa05166 HTLV-I infection; hsa04120 Ubiquitin mediated proteolysis; hsa04914 Progesterone-mediated oocyte maturation; hsa04114 Oocyte meiosis;	IPR011990; IPR013026;	Tetratricopeptide-like helical domain; Tetratricopeptide repeat-containing domain;	D	KOG1126	DNA-binding cell division cycle control protein
Q96RQ9	L-amino-acid oxidase OS=Homo sapiens OX=9606 GN=IL4I1 PE=1 SV=1	2.18	Up	0.049135	IL4I1	62.88					0.57	0.55	0.687	0.578					1.169	2.184	1.065	0.781	extracellular	erythrose 4-phosphate/phosphoenolpyruvate family amino acid catabolic process; alpha-amino acid catabolic process; cellular aromatic compound metabolic process; single-organism process; cellular metabolic process; organic substance metabolic process; L-phenylalanine catabolic process; metabolic process; cellular amino acid metabolic process; organic cyclic compound catabolic process; cellular cat…	organelle; intracellular membrane-bounded organelle; intracellular organelle; cell part; intracellular; lysosome; cytoplasm; vacuole; intracellular part; cell; membrane-bounded organelle; extracellular region; cytoplasmic part; lytic vacuole;	L-amino-acid oxidase activity; oxidoreductase activity, acting on the CH-NH2 group of donors; oxidoreductase activity, acting on the CH-NH2 group of donors, oxygen as acceptor; catalytic activity; oxidoreductase activity;	K03334	IL4I1; L-amino-acid oxidase [EC:1.4.3.2]	hsa00280 Valine, leucine and isoleucine degradation; hsa01100 Metabolic pathways; hsa00270 Cysteine and methionine metabolism; hsa00380 Tryptophan metabolism; hsa00350 Tyrosine metabolism; hsa00360 Phenylalanine metabolism; hsa00400 Phenylalanine, tyrosine and tryptophan biosynthesis; hsa00250 Alanine, aspartate and glutamate metabolism;	IPR002937; IPR023753;	Amine oxidase; FAD/NAD(P)-binding domain;	Q	KOG0029	Amine oxidase
Q9HCJ0	Trinucleotide repeat-containing gene 6C protein OS=Homo sapiens OX=9606 GN=TNRC6C PE=1 SV=3	0.514	Down	0.0050161	TNRC6C	175.96	1.92	1.314	0.965	1.306					0.798	0.687	0.702	0.643					nucleus	single organism signaling; negative regulation of translation, ncRNA-mediated; cell surface receptor signaling pathway; posttranscriptional regulation of gene expression; positive regulation of cellular catabolic process; posttranscriptional gene silencing by RNA; single-organism process; inositol lipid-mediated signaling; non-canonical Wnt signaling pathway; signal transduction; cell communicati…	cell part; intracellular; cytoplasm; intracellular part; cytosol; cell; cytoplasmic part;	organic cyclic compound binding; heterocyclic compound binding; RNA binding; nucleoside phosphate binding; binding; nucleic acid binding; protein binding; nucleotide binding; small molecule binding;	K18412			IPR015940; IPR000504; IPR019486; IPR012677; IPR032226; IPR009060; IPR026805;	Ubiquitin-associated domain; RNA recognition motif domain; Argonaute hook domain; Nucleotide-binding alpha-beta plait domain; TNRC6, PABC binding domain; UBA-like; GW182, middle domain;
P13284	Gamma-interferon-inducible lysosomal thiol reductase OS=Homo sapiens OX=9606 GN=IFI30 PE=1 SV=3	1.721	Up	0.00040307	IFI30	27.963	0.746	0.505	0.779	0.666	0.722	0.788	0.752	0.757	1.174	2.005	0.827	1.341	1.451	1.101	0.999	0.939	extracellular	regulation of cellular process; single organism signaling; regulation of biological quality; regulation of cell proliferation; cell surface receptor signaling pathway; cellular response to organic substance; cellular response to interferon-gamma; single-organism process; negative regulation of biological process; negative regulation of cellular process; response to stimulus; cellular response to …	intracellular organelle; cell junction; intracellular organelle part; cytoplasm; intracellular part; cytosol; cell; extracellular region; lysosomal lumen; organelle part; vacuolar lumen; intracellular membrane-bounded organelle; membrane-enclosed lumen; organelle; intracellular organelle lumen; intracellular; cell part; vacuolar part; lysosome; vacuole; membrane-bounded organelle; organelle lumen…	oxidoreductase activity, acting on a sulfur group of donors; protein binding; catalytic activity; binding; oxidoreductase activity;	K08059	IFI30; interferon, gamma-inducible protein 30	hsa04612 Antigen processing and presentation;			O	KOG3160	Gamma-interferon inducible lysosomal thiol reductase
P42285	Exosome RNA helicase MTR4 OS=Homo sapiens OX=9606 GN=MTREX PE=1 SV=3	1.518	Up	0.00076369	MTREX	117.8	0.721	0.765	0.772	0.814	0.74	0.833	0.833	0.746	0.969	1.771	1.008	0.959	1.193	1.327	1.033	1.187	cytoplasm	cellular component biogenesis; ribonucleoprotein complex biogenesis; cellular aromatic compound metabolic process; maturation of 5.8S rRNA; cellular metabolic process; organic substance metabolic process; cellular nitrogen compound catabolic process; mRNA splicing, via spliceosome; metabolic process; RNA splicing, via transesterification reactions with bulged adenosine as nucleophile; heterocycle…	intracellular organelle; intracellular non-membrane-bounded organelle; intracellular organelle part; macromolecular complex; nuclear lumen; intracellular part; spliceosomal complex; nucleolus; cell; organelle part; non-membrane-bounded organelle; organelle; intracellular membrane-bounded organelle; membrane-enclosed lumen; catalytic complex; nucleoplasm; nucleus; intracellular organelle lumen; ce…	nucleoside phosphate binding; ATP-dependent helicase activity; hydrolase activity, acting on acid anhydrides; protein binding; hydrolase activity; ATPase activity; heterocyclic compound binding; organic cyclic compound binding; pyrophosphatase activity; catalytic activity; ribonucleotide binding; binding; purine ribonucleoside binding; ATP-dependent RNA helicase activity; anion binding; adenyl ri…	K12598	MTR4; ATP-dependent RNA helicase DOB1 [EC:3.6.4.13]	hsa03018 RNA degradation;	IPR011545; IPR012961; IPR027417; IPR025696; IPR014001; IPR001650;	DEAD/DEAH box helicase domain; ATP-dependent RNA helicase Ski2, C-terminal; P-loop containing nucleoside triphosphate hydrolase; rRNA-processing arch domain; Helicase superfamily 1/2, ATP-binding domain; Helicase, C-terminal;	A	KOG0948	Nuclear exosomal RNA helicase MTR4, DEAD-box superfamily
P20592	Interferon-induced GTP-binding protein Mx2 OS=Homo sapiens OX=9606 GN=MX2 PE=1 SV=1	2.491	Up	0.0032156	MX2	82.088	0.525	0.531	0.433	0.693	0.581	0.454	0.511	0.518	1.41	2.27	0.912	0.877	0.899	2.7	0.914	0.594	nucleus	cellular component biogenesis; RNA transport; single organism signaling; cell surface receptor signaling pathway; defense response to other organism; single-organism process; multi-organism cellular process; cellular response to cytokine stimulus; protein transport; response to biotic stimulus; establishment of localization; response to external stimulus; signal transduction; cell communication; …	membrane; intracellular organelle; nuclear pore; mitochondrial part; organelle membrane; nuclear envelope; cytoplasm; intracellular organelle part; organelle envelope; endomembrane system; macromolecular complex; intracellular part; cytosol; cell; mitochondrion; organelle part; mitochondrial envelope; organelle; intracellular membrane-bounded organelle; nucleus; cell part; intracellular; envelope…	nucleoside phosphate binding; hydrolase activity, acting on acid anhydrides; hydrolase activity; protein binding; heterocyclic compound binding; organic cyclic compound binding; cytoskeletal protein binding; pyrophosphatase activity; ribonucleotide binding; catalytic activity; binding; microtubule binding; purine ribonucleoside binding; GTPase activity; anion binding; guanyl nucleotide binding; h…				IPR030381; IPR003130; IPR020850; IPR001401; IPR027417; IPR000375;	Dynamin-type guanine nucleotide-binding (G) domain; Dynamin GTPase effector; GTPase effector domain; Dynamin, GTPase domain; P-loop containing nucleoside triphosphate hydrolase; Dynamin central domain;	UR	KOG0446	Vacuolar sorting protein VPS1, dynamin, and related proteins
Q6P4A8	Phospholipase B-like 1 OS=Homo sapiens OX=9606 GN=PLBD1 PE=1 SV=2	1.528	Up	0.00193578	PLBD1	63.254	0.74	0.959	0.776	0.883	0.807	0.688	0.616	0.925	0.797	1.36	1.254	1.257	1.267	1.865	1.047	0.923	extracellular	phosphatidylcholine metabolic process; lipid catabolic process; glycerolipid metabolic process; single-organism catabolic process; phosphatidylethanolamine acyl-chain remodeling; single-organism cellular process; nitrogen compound metabolic process; ammonium ion metabolic process; single-organism process; cellular lipid metabolic process; phosphatidylcholine acyl-chain remodeling; primary metabol…	intracellular organelle; extracellular space; extracellular region part; cytoplasm; intracellular part; cytosol; cell; extracellular region; intracellular membrane-bounded organelle; organelle; intracellular; cell part; lysosome; vacuole; membrane-bounded organelle; cytoplasmic part; lytic vacuole;	carboxylic ester hydrolase activity; catalytic activity; phospholipase A2 activity; hydrolase activity, acting on ester bonds; lysophospholipase activity; phospholipase activity; hydrolase activity; lipase activity;						T	KOG3774	Uncharacterized conserved protein Lama
Q9NVP1	ATP-dependent RNA helicase DDX18 OS=Homo sapiens OX=9606 GN=DDX18 PE=1 SV=2	1.626	Up	1.64022e-05	DDX18	75.406	0.712	0.864	0.764	0.85	0.689	0.723	0.666	0.713	1.082	1.534	0.984	1.081	1.286	1.596	1.11	1.052	nucleus	response to organic cyclic compound; cellular response to stimulus; cellular aromatic compound metabolic process; cellular response to organic substance; response to oxygen-containing compound; organic cyclic compound metabolic process; nitrogen compound metabolic process; response to estradiol; cellular response to organic cyclic compound; response to organic substance; response to stimulus; pri…	intracellular organelle; membrane; intracellular non-membrane-bounded organelle; intracellular organelle part; nuclear lumen; intracellular part; nucleolus; cell; organelle part; non-membrane-bounded organelle; intracellular membrane-bounded organelle; organelle; membrane-enclosed lumen; nucleus; intracellular organelle lumen; intracellular; cell part; chromosome; membrane-bounded organelle; orga…	nucleoside phosphate binding; ATP-dependent helicase activity; hydrolase activity, acting on acid anhydrides; protein binding; hydrolase activity; ATPase activity; heterocyclic compound binding; organic cyclic compound binding; pyrophosphatase activity; catalytic activity; ribonucleotide binding; binding; purine ribonucleoside binding; ATP-dependent RNA helicase activity; anion binding; adenyl ri…	K13179			IPR011545; IPR014014; IPR025313; IPR027417; IPR014001; IPR001650;	DEAD/DEAH box helicase domain; RNA helicase, DEAD-box type, Q motif; Domain of unknown function DUF4217; P-loop containing nucleoside triphosphate hydrolase; Helicase superfamily 1/2, ATP-binding domain; Helicase, C-terminal;	A	KOG0342	ATP-dependent RNA helicase pitchoune
P61956	Small ubiquitin-related modifier 2 OS=Homo sapiens OX=9606 GN=SUMO2 PE=1 SV=3	1.551	Up	0.036584	SUMO2	10.871	0.808	0.771	0.704	0.762	0.651	0.851	0.747	0.904	1.152	1.68	0.9	1.208	0.767	2.178	1.073	0.654	cytoplasm	positive regulation of cellular protein metabolic process; positive regulation of proteasomal ubiquitin-dependent protein catabolic process; positive regulation of cellular catabolic process; nucleotide-excision repair; positive regulation of biosynthetic process; cellular metabolic process; regulation of RNA biosynthetic process; positive regulation of cellular protein catabolic process; metabol…	intracellular organelle; intracellular organelle part; nuclear lumen; intracellular part; cell; nuclear body; organelle part; membrane-enclosed lumen; organelle; intracellular membrane-bounded organelle; nucleoplasm; PML body; nucleus; intracellular organelle lumen; cell part; intracellular; membrane-bounded organelle; nucleoplasm part; organelle lumen; nuclear part;	organic cyclic compound binding; heterocyclic compound binding; RNA binding; ubiquitin-like protein transferase activity; ubiquitin protein ligase binding; catalytic activity; binding; nucleic acid binding; protein tag; protein binding; ubiquitin-like protein ligase binding; transferase activity; enzyme binding; SUMO transferase activity;	K12160	SUMO; small ubiquitin-related modifier	hsa05418 Fluid shear stress and atherosclerosis; hsa03013 RNA transport;	IPR029071; IPR000626; IPR033950; IPR022617;	Ubiquitin-related domain; Ubiquitin domain; Sumo domain; Rad60/SUMO-like domain;	O	KOG1769	Ubiquitin-like proteins
Q8N283	Ankyrin repeat domain-containing protein 35 OS=Homo sapiens OX=9606 GN=ANKRD35 PE=2 SV=2	0.566	Down	0.000144765	ANKRD35	109.96	1.321	1.425	1.526	1.233	1.053	1.4	1.71	1.519	0.793	0.48	1.048	0.871	0.775	0.509	1.02	0.84	mitochondria			protein binding; binding;				IPR020683;	Ankyrin repeat-containing domain;	M	KOG4177	Ankyrin
O15533	Tapasin OS=Homo sapiens OX=9606 GN=TAPBP PE=1 SV=1	2.132	Up	0.008475	TAPBP	47.625	0.695	0.55	0.465	0.633	0.532	0.646	0.663	0.871	0.871	2.438	0.581	1.341	1.921	1.689	1.259	0.679	plasma membrane	cellular component biogenesis; vesicle fusion with endoplasmic reticulum-Golgi intermediate compartment (ERGIC) membrane; cellular component organization; organelle membrane fusion; regulation of biological quality; peptide metabolic process; peptide stabilization; regulation of macromolecule metabolic process; Golgi vesicle transport; single-organism process; response to stimulus; cellular metab…	membrane; nuclear outer membrane-endoplasmic reticulum membrane network; endoplasmic reticulum; cytoplasmic vesicle; organelle membrane; membrane protein complex; vesicle; cytoplasm; cytoplasmic vesicle part; macromolecular complex; intrinsic component of membrane; intracellular part; cell; organelle part; membrane part; intracellular; cell part; phagocytic vesicle membrane; whole membrane; intri…	active transmembrane transporter activity; TAP1 binding; TAP binding; receptor binding; primary active transmembrane transporter activity; hydrolase activity, acting on acid anhydrides; hydrolase activity; protein binding; amide binding; nucleoside-triphosphatase activity; MHC class I protein binding; TAP2 binding; antigen binding; ATPase activity; P-P-bond-hydrolysis-driven transmembrane transpo…	K08058	TAPBP; TAP binding protein (tapasin)	hsa04612 Antigen processing and presentation;	IPR007110; IPR013783; IPR003597;	Immunoglobulin-like domain; Immunoglobulin-like fold; Immunoglobulin C1-set;
Q2UY09	Collagen alpha-1(XXVIII) chain OS=Homo sapiens OX=9606 GN=COL28A1 PE=2 SV=2	0.415	Down	3.5517e-07	COL28A1	116.66	1.392	1.204	1.685	1.497	1.155	2.096	1.754	1.564	0.638	0.641	0.857	0.639	0.426	0.495	0.691	0.733	mitochondria	regulation of endopeptidase activity; regulation of cellular process; negative regulation of endopeptidase activity; negative regulation of proteolysis; regulation of primary metabolic process; regulation of macromolecule metabolic process; negative regulation of cellular process; negative regulation of biological process; negative regulation of cellular metabolic process; regulation of proteolys…	endoplasmic reticulum lumen; intracellular organelle; extracellular region part; endoplasmic reticulum; cytoplasm; intracellular organelle part; macromolecular complex; endomembrane system; intracellular part; cell; extracellular matrix component; extracellular region; collagen trimer; organelle part; basement membrane; extracellular matrix; organelle; intracellular membrane-bounded organelle; me…	serine-type endopeptidase inhibitor activity; enzyme regulator activity; peptidase inhibitor activity; peptidase regulator activity; endopeptidase regulator activity; molecular function regulator; enzyme inhibitor activity; endopeptidase inhibitor activity;				IPR002035; IPR002223;	von Willebrand factor, type A; Pancreatic trypsin inhibitor Kunitz domain;	W	KOG3544	Collagens (type IV and type XIII), and related proteins
P48061	Stromal cell-derived factor 1 OS=Homo sapiens OX=9606 GN=CXCL12 PE=1 SV=1	0.461	Down	0.0031983	CXCL12	10.666	1.389	1.461	1.091	1.707	1.159	0.861	3.093	1.363	1.136	0.301	1.257	0.336	0.885	0.42	0.65	0.603	extracellular	single organism signaling; regulation of cell death; response to biotic stimulus; positive regulation of growth; regulation of cell growth; regulation of cellular component size; metal ion homeostasis; regulation of cytoskeleton organization; cellular response to stimulus; positive regulation of cell growth; negative regulation of leukocyte cell-cell adhesion; generation of neurons; single-organi…	membrane; extracellular space; extracellular region part; external side of plasma membrane; cell periphery; vesicle; cytoplasm; intracellular part; cell; extracellular region; plasma membrane; extracellular exosome; organelle; plasma membrane part; cell part; membrane part; intracellular; extracellular vesicle; cell surface; membrane-bounded organelle; extracellular organelle; side of membrane;	growth factor activity; cytokine activity; CXCR chemokine receptor binding; receptor binding; binding; chemokine receptor binding; cytokine receptor binding; G-protein coupled receptor binding; protein binding; chemokine activity; chemoattractant activity;	K10031	CXCL12; C-X-C motif chemokine 12	hsa04672 Intestinal immune network for IgA production; hsa05200 Pathways in cancer; hsa05323 Rheumatoid arthritis; hsa04060 Cytokine-cytokine receptor interaction; hsa04670 Leukocyte transendothelial migration; hsa04360 Axon guidance; hsa04062 Chemokine signaling pathway; hsa04064 NF-kappa B signaling pathway;	IPR033899; IPR001811;	CXC Chemokine domain; Chemokine interleukin-8-like domain;
P15309	Prostatic acid phosphatase OS=Homo sapiens OX=9606 GN=ACPP PE=1 SV=3	0.586	Down	0.00192242	ACPP	44.566	1.18	1.313	1.644	1.092	1.02	1.605	1.451	1.498	0.718	0.44	1.261	0.788	0.433	0.928	1.135	0.631	extracellular	nucleoside metabolic process; purine nucleoside metabolic process; leukocyte activation; regulation of signaling; nucleotide metabolic process; single-organism process; thiamine metabolic process; cellular metabolic process; phosphate-containing compound metabolic process; establishment of localization; metabolic process; regulation of cell communication; nucleoside phosphate metabolic process; r…	membrane; extracellular space; extracellular region part; organelle membrane; cytoplasmic vesicle; cell periphery; cytoplasm; vesicle; cytoplasmic vesicle part; intrinsic component of membrane; intracellular part; actin-based cell projection; cell; organelle part; extracellular exosome; lysosomal membrane; membrane part; cell part; intracellular; whole membrane; lysosome; secretory vesicle; extra…	lysophosphatidic acid phosphatase activity; 5'-nucleotidase activity; identical protein binding; acid phosphatase activity; catalytic activity; phosphoric ester hydrolase activity; nucleotidase activity; binding; phosphatase activity; hydrolase activity, acting on ester bonds; hydrolase activity; protein binding; thiamine phosphate phosphatase activity;	K19283					I	KOG3720	Lysosomal & prostatic acid phosphatases
Q9NZN4	EH domain-containing protein 2 OS=Homo sapiens OX=9606 GN=EHD2 PE=1 SV=2	0.44	Down	1.4161e-06	EHD2	61.161	1.101	1.344	1.497	1.683	1.878	1.261	1.512	1.966	0.698	0.495	0.952	0.759	0.732	0.512	0.5	0.744	cytoplasm	regulation of vesicle-mediated transport; endomembrane system organization; blood coagulation; regulation of biological quality; regulation of syncytium formation by plasma membrane fusion; single-organism process; positive regulation of myoblast fusion; establishment of localization; positive regulation of cellular component organization; response to wounding; actin cytoskeleton organization; re…	membrane; extracellular region part; cytoplasmic vesicle; organelle membrane; extrinsic component of membrane; membrane microdomain; cell periphery; vesicle; cytoplasm; cytoplasmic vesicle part; recycling endosome membrane; intracellular part; cell; organelle part; recycling endosome; non-membrane-bounded organelle; cytoskeleton; extracellular exosome; plasma membrane region; microtubule cytoskel…	nucleoside phosphate binding; hydrolase activity; protein binding; organic cyclic compound binding; heterocyclic compound binding; catalytic activity; ribonucleotide binding; binding; purine ribonucleoside binding; cation binding; anion binding; adenyl ribonucleotide binding; adenyl nucleotide binding; guanyl nucleotide binding; GTP binding; purine nucleotide binding; purine ribonucleoside tripho…	K12469	EHD2; EH domain-containing protein 2	hsa04144 Endocytosis;	IPR030381; IPR000261; IPR011992; IPR002048; IPR027417; IPR031692;	Dynamin-type guanine nucleotide-binding (G) domain; EH domain; EF-hand domain pair; EF-hand domain; P-loop containing nucleoside triphosphate hydrolase; EH domain-containing protein, N-terminal;	TU	KOG1954	Endocytosis/signaling protein EHD1
Q99986	Serine/threonine-protein kinase VRK1 OS=Homo sapiens OX=9606 GN=VRK1 PE=1 SV=1	1.644	Up	0.00037668	VRK1	45.476	0.843	0.774	0.666	0.719	0.775	0.743	0.67	0.716	1.537	1.444	1.079	0.947	1.354	1.358	0.829	1.16	mitochondria	regulation of biological quality; endomembrane system organization; peptidyl-serine modification; mitotic nuclear division; organelle disassembly; single-organism process; cellular metabolic process; histone phosphorylation; phosphate-containing compound metabolic process; metabolic process; regulation of cell shape; organelle inheritance; protein autophosphorylation; mitotic nuclear envelope rea…	cytoplasm; intracellular part; cell; organelle part; non-membrane-bounded organelle; cytoskeleton; membrane-enclosed lumen; nucleoplasm; intracellular organelle lumen; microtubule cytoskeleton; intracellular; cell part; Golgi subcompartment; Golgi apparatus part; membrane-bounded organelle; organelle lumen; intracellular organelle; intracellular non-membrane-bounded organelle; cytoskeletal part; …	histone kinase activity (H3-S10 specific); nucleoside phosphate binding; phosphotransferase activity, alcohol group as acceptor; protein kinase binding; protein binding; chromatin binding; protein kinase activity; heterocyclic compound binding; organic cyclic compound binding; kinase activity; ribonucleotide binding; catalytic activity; binding; purine ribonucleoside binding; anion binding; adeny…	K08816			IPR000719; IPR011009;	Protein kinase domain; Protein kinase-like domain;	T	KOG1164	Casein kinase (serine/threonine/tyrosine protein kinase)
Q8NHP8	Putative phospholipase B-like 2 OS=Homo sapiens OX=9606 GN=PLBD2 PE=1 SV=2	1.718	Up	0.0077358	PLBD2	65.471					0.631	0.72	0.834	0.63					0.995	1.505	0.947	1.389	extracellular	lipid catabolic process; organic substance catabolic process; metabolic process; single-organism metabolic process; single-organism catabolic process; single-organism process; primary metabolic process; catabolic process; organic substance metabolic process; lipid metabolic process;	intracellular organelle; extracellular region part; cytoplasm; intracellular organelle part; vesicle; intracellular part; cell; lysosomal lumen; extracellular region; organelle part; vacuolar lumen; intracellular membrane-bounded organelle; membrane-enclosed lumen; organelle; extracellular exosome; intracellular organelle lumen; intracellular; cell part; vacuolar part; lysosome; extracellular ves…	hydrolase activity; catalytic activity;						T	KOG3774	Uncharacterized conserved protein Lama
Q8N4F0	BPI fold-containing family B member 2 OS=Homo sapiens OX=9606 GN=BPIFB2 PE=1 SV=2	0.354	Down	0.0042998	BPIFB2	49.172	2.671	1.51	1.598	0.556	0.683	2.431	0.699	1.61	0.453	0.5	0.525	0.522	0.64	0.518	0.529	0.476	extracellular	response to external stimulus; antimicrobial humoral response; immune system process; humoral immune response; response to external biotic stimulus; immune response; response to stimulus; response to other organism; multi-organism process; response to biotic stimulus;	extracellular exosome; organelle; extracellular space; extracellular region part; vesicle; extracellular vesicle; membrane-bounded organelle; extracellular region; extracellular organelle;	lipid binding; binding;				IPR017943; IPR017942; IPR001124;	Bactericidal permeability-increasing protein, alpha/beta domain; Lipid-binding serum glycoprotein, N-terminal; Lipid-binding serum glycoprotein, C-terminal;	V	KOG4160	BPI/LBP/CETP family protein
P13591	Neural cell adhesion molecule 1 OS=Homo sapiens OX=9606 GN=NCAM1 PE=1 SV=3	0.428	Down	8.1576e-05	NCAM1	94.573	0.926	1.214	1.679	1.365	1.966	1.985	1.655	1.627	0.659	0.696	0.999	1.012	0.706	0.391	0.415	0.442	peroxisome	entry into host; single organism signaling; cell surface receptor signaling pathway; cellular developmental process; neuron development; cellular response to interferon-gamma; single-organism process; cellular component morphogenesis; neurogenesis; multi-organism cellular process; cellular metabolic process; cellular response to cytokine stimulus; phosphate-containing compound metabolic process; …	membrane; extracellular region part; external side of plasma membrane; organelle membrane; cell periphery; vesicle; cytoplasm; intrinsic component of membrane; intracellular part; cell; organelle part; extracellular exosome; intracellular; cell part; membrane part; extracellular vesicle; Golgi apparatus part; membrane-bounded organelle; side of membrane; intracellular organelle; bounding membrane…	molecular transducer activity; identical protein binding; receptor activity; guanyl-nucleotide exchange factor activity; binding; protein binding; Ras guanyl-nucleotide exchange factor activity; molecular function regulator; virus receptor activity;	K06491	NCAM; neural cell adhesion molecule	hsa04514 Cell adhesion molecules (CAMs); hsa05020 Prion diseases;	IPR003598; IPR007110; IPR013783; IPR003599; IPR003961; IPR013098;	Immunoglobulin subtype 2; Immunoglobulin-like domain; Immunoglobulin-like fold; Immunoglobulin subtype; Fibronectin type III; Immunoglobulin I-set;	T	KOG3510	FOG: Immunoglobulin C-2 Type/fibronectin type III domains
P15586	N-acetylglucosamine-6-sulfatase OS=Homo sapiens OX=9606 GN=GNS PE=1 SV=3	1.533	Up	0.004176	GNS	62.081	0.734	0.795	0.725	0.837	0.83	0.844	0.816	0.735	1.032	1.284	0.832	1.854	1.078	1.525	0.934	1.146	plasma membrane	leukocyte activation; neutrophil activation involved in immune response; immune effector process; aminoglycan catabolic process; single-organism process; keratan sulfate catabolic process; response to stimulus; cellular metabolic process; establishment of localization; organic substance metabolic process; glycosaminoglycan metabolic process; keratan sulfate metabolic process; metabolic process; m…	secretory granule lumen; extracellular region part; cytoplasmic vesicle; cytoplasm; vesicle; cytoplasmic vesicle part; intracellular part; azurophil granule lumen; cell; ficolin-1-rich granule lumen; organelle part; vacuolar lumen; extracellular exosome; ficolin-1-rich granule; membrane-enclosed lumen; vesicle lumen; intracellular organelle lumen; cell part; intracellular; lysosome; secretory ves…	sulfuric ester hydrolase activity; N-acetylglucosamine-6-sulfatase activity; catalytic activity; binding; ion binding; hydrolase activity, acting on ester bonds; cation binding; metal ion binding; hydrolase activity; protein binding;	K01137	GNS; N-acetylglucosamine-6-sulfatase [EC:3.1.6.14]	hsa04142 Lysosome; hsa01100 Metabolic pathways; hsa00531 Glycosaminoglycan degradation;	IPR017849; IPR000917; IPR017850;	Alkaline phosphatase-like, alpha/beta/alpha; Sulfatase, N-terminal; Alkaline-phosphatase-like, core domain;	G	KOG3731	Sulfatases
Q9NZT2	Opioid growth factor receptor OS=Homo sapiens OX=9606 GN=OGFR PE=1 SV=3	1.51	Up	3.6543e-05	OGFR	73.324	0.79	0.933	0.847	0.895	0.708	0.729	0.79	0.685	1.259	1.166	1.013	1.229	1.385	1.53	0.957	1.092	nucleus	single organism signaling; regulation of cellular process; cellular response to stimulus; regulation of growth; single-organism process; signaling; response to stimulus; regulation of cell growth; G-protein coupled receptor signaling pathway; signal transduction; regulation of biological process; cell communication; regulation of cellular component organization; opioid receptor signaling pathway;…	organelle; intracellular membrane-bounded organelle; intracellular organelle; membrane; nucleus; cell part; intracellular; cytoplasm; intracellular part; membrane-bounded organelle; cell;	signaling receptor activity; G-protein coupled peptide receptor activity; opioid receptor activity; molecular transducer activity; receptor activity; binding; G-protein coupled receptor activity; protein binding; peptide receptor activity; transmembrane signaling receptor activity; signal transducer activity; transmembrane receptor activity;				IPR006757;	Opioid growth factor receptor (OGFr) conserved domain;
Q86T65	Disheveled-associated activator of morphogenesis 2 OS=Homo sapiens OX=9606 GN=DAAM2 PE=1 SV=3	0.619	Down	0.0089584	DAAM2	123.5	0.913	1.407	1.541	1.345					0.889	0.779	0.815	0.739					cytoplasm	developmental process; single-multicellular organism process; cellular component organization; pattern specification process; single-organism cellular process; single-organism process; multicellular organismal process; single-organism organelle organization; actin cytoskeleton organization; determination of bilateral symmetry; determination of left/right symmetry; specification of symmetry; organ…	extracellular exosome; organelle; extracellular region part; vesicle; extracellular vesicle; membrane-bounded organelle; extracellular region; extracellular organelle;	small GTPase binding; Rho GTPase binding; cytoskeletal protein binding; Ras GTPase binding; binding; actin binding; protein binding; GTPase binding; enzyme binding;	K04512	DAAM; dishevelled associated activator of morphogenesis	hsa04310 Wnt signaling pathway;	IPR010473; IPR014767; IPR010472; IPR011989; IPR014768; IPR015425; IPR016024;	Formin, GTPase-binding domain; Diaphanous autoregulatory (DAD) domain; Formin, FH3 domain; Armadillo-like helical; Rho GTPase-binding/formin homology 3 (GBD/FH3) domain; Formin, FH2 domain; Armadillo-type fold;	TZ	KOG1922	Rho GTPase effector BNI1 and related formins
Q6IQ23	Pleckstrin homology domain-containing family A member 7 OS=Homo sapiens OX=9606 GN=PLEKHA7 PE=1 SV=2	0.666	Down	0.00096408	PLEKHA7	127.13	1.1	1.198	1.501	1.365	0.852	1.486	1.274	1.253	0.756	0.713	0.977	0.653	0.628	1.038	1.087	0.828	nucleus	zonula adherens maintenance; epithelial cell-cell adhesion; cellular component organization; biological adhesion; cellular component maintenance; single organismal cell-cell adhesion; cell junction organization; cell-cell junction maintenance; single-organism cellular process; cell-cell junction organization; single organism cell adhesion; cell-cell adhesion; cell adhesion; single-organism proces…	extracellular region part; cell junction; cytoplasm; vesicle; intracellular part; cell-cell adherens junction; cell-cell junction; cell; organelle part; non-membrane-bounded organelle; extracellular exosome; cytoskeleton; microtubule organizing center; microtubule cytoskeleton; intracellular; cell part; adherens junction; extracellular vesicle; membrane-bounded organelle; intracellular organelle;…	protein binding; delta-catenin binding; binding;				IPR011993; IPR001202; IPR001849;	PH domain-like; WW domain; Pleckstrin homology domain;	O	KOG0940	Ubiquitin protein ligase RSP5/NEDD4
P00749	Urokinase-type plasminogen activator OS=Homo sapiens OX=9606 GN=PLAU PE=1 SV=2	3.195	Up	0.00101899	PLAU	48.507					0.5	0.299	0.471	0.473					1.344	1.688	0.878	1.659	extracellular	single organism signaling; blood coagulation; regulation of biological quality; positive regulation of cell migration; leukocyte activation; localization of cell; positive regulation of locomotion; regulation of signaling; negative regulation of multicellular organismal process; single-organism process; regulation of receptor activity; establishment of localization; fibrinolysis; response to woun…	membrane; extracellular space; extracellular region part; organelle membrane; cytoplasmic vesicle; cell junction; cell periphery; vesicle; cytoplasm; cytoplasmic vesicle part; intracellular part; cell; organelle part; tertiary granule membrane; extracellular exosome; focal adhesion; cell part; intracellular; whole membrane; secretory vesicle; adherens junction; extracellular vesicle; cell-substra…	serine-type endopeptidase activity; endopeptidase activity; peptidase activity; serine hydrolase activity; catalytic activity; binding; serine-type peptidase activity; peptidase activity, acting on L-amino acid peptides; hydrolase activity; protein binding;	K01348	PLAU; urokinase plasminogen activator [EC:3.4.21.73]	hsa04610 Complement and coagulation cascades; hsa05205 Proteoglycans in cancer; hsa05206 MicroRNAs in cancer; hsa04064 NF-kappa B signaling pathway; hsa05202 Transcriptional misregulation in cancer;	IPR009003; IPR000001; IPR001254; IPR000742; IPR013806;	Peptidase S1, PA clan; Kringle; Serine proteases, trypsin domain; EGF-like domain; Kringle-like fold;	T	KOG1217	Fibrillins and related proteins containing Ca2+-binding EGF-like domains
O75781	Paralemmin-1 OS=Homo sapiens OX=9606 GN=PALM PE=1 SV=2	0.552	Down	0.00020478	PALM	42.075	1.238	1.167	1.446	1.434	1.436	1.513	1.379	1.447	0.464	0.976	0.797	0.912	0.899	0.665	0.573	0.816	nucleus	developmental maturation; regulation of biological quality; negative regulation of cAMP metabolic process; regulation of cell projection assembly; negative regulation of nucleotide metabolic process; establishment of protein localization to plasma membrane; protein transport; regulation of cell shape; protein localization; single-organism transport; nervous system development; cellular response t…	basolateral plasma membrane; membrane; dendrite; cytoplasmic vesicle; cell periphery; cytoplasm; vesicle; intrinsic component of membrane; intracellular part; integral component of plasma membrane; actin-based cell projection; cell; asymmetric synapse; dendritic spine; neuron projection membrane; apicolateral plasma membrane; neuron spine; plasma membrane region; leading edge membrane; intracellu…	D3 dopamine receptor binding; protein binding; G-protein coupled receptor binding; receptor binding; binding; dopamine receptor binding;	K16519
O94911	ATP-binding cassette sub-family A member 8 OS=Homo sapiens OX=9606 GN=ABCA8 PE=1 SV=3	0.434	Down	2.1401e-06	ABCA8	179.24	1.456	1.464	1.678	1.602	1.501	1.131	1.462	1.902	0.53	0.461	0.686	0.689	0.527	0.479	0.758	1.158	plasma membrane	lipid transport; single-organism process; organic substance transport; lipid localization; response to stimulus; establishment of localization; transport; transmembrane transport; response to drug; response to chemical; single-organism localization; drug transport; localization; macromolecule localization; xenobiotic transport; drug transmembrane transport; single-organism transport;	intracellular organelle; membrane; mitochondrial part; organelle membrane; cell periphery; organelle envelope; intracellular organelle part; cytoplasm; intrinsic component of membrane; intracellular part; cell; integral component of membrane; organelle part; mitochondrion; plasma membrane; organelle; intracellular membrane-bounded organelle; mitochondrial envelope; intracellular; cell part; membr…	nucleoside phosphate binding; primary active transmembrane transporter activity; xenobiotic transporter activity; hydrolase activity, acting on acid anhydrides; hydrolase activity; ATPase activity; organic cyclic compound binding; heterocyclic compound binding; pyrophosphatase activity; catalytic activity; ribonucleotide binding; ATPase activity, coupled to movement of substances; binding; purine…	K05650	ABCA8; ATP-binding cassette, subfamily A (ABC1), member 8	hsa02010 ABC transporters;	IPR003593; IPR003439; IPR027417;	AAA+ ATPase domain; ABC transporter-like; P-loop containing nucleoside triphosphate hydrolase;	IR	KOG0059	Lipid exporter ABCA1 and related proteins, ABC superfamily
Q7Z2T5	TRMT1-like protein OS=Homo sapiens OX=9606 GN=TRMT1L PE=1 SV=2	1.759	Up	0.00107554	TRMT1L	81.746	0.629	0.645	0.656	0.739	0.616	0.85	0.803	0.645	1.165	1.76	1.018	1.241	1.329	1.656	0.932	0.722	nucleus	RNA processing; ncRNA processing; cellular aromatic compound metabolic process; organic cyclic compound metabolic process; nitrogen compound metabolic process; primary metabolic process; RNA modification; cellular metabolic process; methylation; organic substance metabolic process; behavior; RNA metabolic process; metabolic process; tRNA metabolic process; heterocycle metabolic process; nucleic a…		S-adenosylmethionine-dependent methyltransferase activity; RNA binding; methyltransferase activity; ion binding; transferase activity, transferring one-carbon groups; heterocyclic compound binding; organic cyclic compound binding; RNA methyltransferase activity; catalytic activity; tRNA binding; binding; tRNA (guanine) methyltransferase activity; nucleic acid binding; metal ion binding; cation bi…				IPR015880; IPR029063; IPR007087;	Zinc finger, C2H2-like; S-adenosyl-L-methionine-dependent methyltransferase; Zinc finger, C2H2;	J	KOG1253	tRNA methyltransferase
O75962	Triple functional domain protein OS=Homo sapiens OX=9606 GN=TRIO PE=1 SV=2	1.51	Up	0.036201	TRIO	346.9	0.693	0.723	0.702	1.075					1.369	1.487	0.939	1.025					nucleus	single organism signaling; regulation of cellular process; phosphorylation; regulation of cell death; cell surface receptor signaling pathway; regulation of signaling; cellular protein metabolic process; regulation of programmed cell death; single-organism process; positive regulation of apoptotic process; regulation of Ras protein signal transduction; response to stimulus; cellular metabolic pro…	cell part; intracellular; cytoplasm; intracellular part; cell; cytosol; cytoplasmic part;	nucleoside phosphate binding; phosphotransferase activity, alcohol group as acceptor; guanyl-nucleotide exchange factor activity; protein binding; protein kinase activity; molecular function regulator; organic cyclic compound binding; heterocyclic compound binding; kinase activity; catalytic activity; ribonucleotide binding; binding; purine ribonucleoside binding; anion binding; adenyl ribonucleo…	K08810			IPR003598; IPR007110; IPR003599; IPR000219; IPR013098; IPR011009; IPR001849; IPR001251; IPR001452; IPR000719; IPR013783; IPR011993;	Immunoglobulin subtype 2; Immunoglobulin-like domain; Immunoglobulin subtype; Dbl homology (DH) domain; Immunoglobulin I-set; Protein kinase-like domain; Pleckstrin homology domain; CRAL-TRIO lipid binding domain; SH3 domain; Protein kinase domain; Immunoglobulin-like fold; PH domain-like;	T	KOG0032	Ca2+/calmodulin-dependent protein kinase, EF-Hand protein superfamily
O60232	Sjoegren syndrome/scleroderma autoantigen 1 OS=Homo sapiens OX=9606 GN=SSSCA1 PE=1 SV=1	1.609	Up	9.6869e-05	SSSCA1	21.474	0.839	0.936	0.791	0.946	0.623	0.738	0.63	0.583	1.055	1.271	1.172	1.096	1.331	1.573	1.364	0.93	extracellular	cellular component organization; mitotic cell cycle; organelle organization; mitotic nuclear division; organelle fission; single-organism cellular process; nuclear division; single-organism process; cell cycle process; cell division; mitotic cell cycle process; cellular process; cell cycle; cellular component organization or biogenesis;		protein binding; identical protein binding; binding;						DV	KOG4537	Zn-ribbon-containing protein implicated in mitosis
Q7Z465	Bcl-2/adenovirus E1B 19 kDa-interacting protein 2-like protein OS=Homo sapiens OX=9606 GN=BNIPL PE=1 SV=1	0.383	Down	0.0081249	BNIPL	39.712					1.312	1.6	1.431	2.476					0.539	0.487	1.146	0.443	nucleus	regulation of cellular process; regulation of growth rate; regulation of biological process; regulation of growth; regulation of cell proliferation; cell death; apoptotic process; single-organism cellular process; single-organism process; programmed cell death; negative regulation of cellular process; negative regulation of biological process; cellular process; negative regulation of cell prolife…	organelle; intracellular membrane-bounded organelle; intracellular organelle; nucleus; cell part; intracellular; cytoplasm; intracellular part; cytosol; membrane-bounded organelle; cell; cytoplasmic part;	protein binding; identical protein binding; binding;	K18448			IPR001251;	CRAL-TRIO lipid binding domain;	TZ	KOG4406	CDC42 Rho GTPase-activating protein
P55083	Microfibril-associated glycoprotein 4 OS=Homo sapiens OX=9606 GN=MFAP4 PE=1 SV=2	0.393	Down	4.4189e-05	MFAP4	28.648	1.437	1.407	1.822	1.867	1.123	1.368	1.471	2.258	0.447	0.292	0.888	0.648	0.788	0.455	0.439	1.053	extracellular	cellular component biogenesis; cellular component organization; regulation of multicellular organismal metabolic process; regulation of macromolecule metabolic process; elastic fiber assembly; response to abiotic stimulus; cellular response to UV; single-organism process; response to stimulus; regulation of multicellular organismal process; cellular response to UV-B; biological adhesion; cellular…	extracellular space; extracellular region part; vesicle; supramolecular fiber; elastic fiber; supramolecular complex; microfibril; extracellular matrix component; extracellular region; supramolecular polymer; organelle; extracellular exosome; extracellular matrix; extracellular vesicle; proteinaceous extracellular matrix; membrane-bounded organelle; extracellular organelle;	protein binding; binding;				IPR002181; IPR014716; IPR014715;	Fibrinogen, alpha/beta/gamma chain, C-terminal globular domain; Fibrinogen, alpha/beta/gamma chain, C-terminal globular, subdomain 1; Fibrinogen, alpha/beta/gamma chain, C-terminal globular, subdomain 2;	R	KOG2579	Ficolin and related extracellular proteins
P05067	Amyloid-beta A4 protein OS=Homo sapiens OX=9606 GN=APP PE=1 SV=3	1.62	Up	0.000103197	APP	86.942	0.721	0.929	0.891	0.805	0.673	0.661	0.698	0.668	1.494	1.072	1.174	1.077	1.421	1.107	0.85	1.602	extracellular	cellular component biogenesis; single organism signaling; developmental maturation; regulation of cell death; suckling behavior; reproductive process; posttranscriptional regulation of gene expression; alcohol metabolic process; positive regulation of biosynthetic process; regulation of neuron apoptotic process; defense response to other organism; response to organophosphorus; regulation of respo…	dendrite; membrane; extracellular region part; spindle midzone; organelle membrane; membrane microdomain; cytoplasm; cytoplasmic vesicle part; macromolecular complex; trans-Golgi network membrane; integral component of plasma membrane; actin-based cell projection; cell; dendritic spine; organelle part; non-membrane-bounded organelle; extracellular exosome; intracellular; secretory vesicle; membra…	receptor binding; protein dimerization activity; peptidase regulator activity; acetylcholine receptor binding; peptidase activator activity; protein binding; heparin binding; enzyme inhibitor activity; molecular function regulator; heterocyclic compound binding; organic cyclic compound binding; identical protein binding; binding; peptidase inhibitor activity; cation binding; anion binding; endope…	K04520	APP; amyloid beta A4 protein	hsa05010 Alzheimer's disease; hsa04726 Serotonergic synapse;	IPR024329; IPR008154; IPR019543; IPR011178; IPR013803; IPR015849; IPR002223;	Amyloidogenic glycoprotein, E2 domain; Amyloidogenic glycoprotein, extracellular; Beta-amyloid precursor protein C-terminal; Amyloidogenic glycoprotein, copper-binding; Amyloidogenic glycoprotein, amyloid-beta peptide; Amyloidogenic glycoprotein, heparin-binding; Pancreatic trypsin inhibitor Kunitz domain;	R	KOG3540	Beta amyloid precursor protein
P02790	Hemopexin OS=Homo sapiens OX=9606 GN=HPX PE=1 SV=2	0.603	Down	8.9949e-08	HPX	51.676	1.247	1.431	1.249	1.219	1.62	1.314	1.204	1.165	0.843	0.702	0.801	0.748	0.859	0.653	0.835	0.864	extracellular	regulation of biological quality; positive regulation of cellular protein metabolic process; positive regulation of adaptive immune response based on somatic recombination of immune receptors built from immunoglobulin superfamily domains; regulation of response to interferon-gamma; regulation of defense response; positive regulation of response to interferon-gamma; cellular metabolic process; met…	intracellular organelle; intracellular vesicle; extracellular space; extracellular region part; cytoplasmic vesicle; cytoplasm; intracellular organelle part; vesicle; cytoplasmic vesicle part; intracellular part; cell; extracellular region; organelle part; membrane-enclosed lumen; organelle; extracellular exosome; vesicle lumen; blood microparticle; cytoplasmic vesicle lumen; intracellular organe…	heme transporter activity; binding; ion binding; cation binding; metal ion binding; protein binding; cofactor transporter activity; transporter activity;	K18977			IPR000585;	Hemopexin-like domain;	OW	KOG1565	Gelatinase A and related matrix metalloproteases
P33993	DNA replication licensing factor MCM7 OS=Homo sapiens OX=9606 GN=MCM7 PE=1 SV=4	1.888	Up	0.000199492	MCM7	81.307	0.725	0.654	0.624	0.706	0.621	0.593	0.725	0.615	1.206	1.818	1.113	1.091	0.985	1.683	0.857	1.182	nucleus	DNA unwinding involved in DNA replication; DNA geometric change; single-organism process; biosynthetic process; cellular response to growth factor stimulus; cellular metabolic process; metabolic process; response to endogenous stimulus; cell cycle phase transition; response to growth factor; macromolecule metabolic process; DNA-dependent DNA replication; cellular response to chemical stimulus; DN…	membrane; nuclear chromosome, telomeric region; chromosome, telomeric region; cytoplasm; macromolecular complex; intracellular part; MCM complex; cell; organelle part; chromosomal part; non-membrane-bounded organelle; membrane-enclosed lumen; nucleoplasm; intracellular organelle lumen; nuclear chromosome part; intracellular; cell part; chromosome; membrane-bounded organelle; organelle lumen; intr…	nucleoside phosphate binding; single-stranded DNA binding; hydrolase activity, acting on acid anhydrides; protein binding; hydrolase activity; heterocyclic compound binding; organic cyclic compound binding; pyrophosphatase activity; catalytic activity; ribonucleotide binding; binding; purine ribonucleoside binding; anion binding; adenyl ribonucleotide binding; adenyl nucleotide binding; hydrolase…	K02210	MCM7; DNA replication licensing factor MCM7 [EC:3.6.4.12]	hsa04110 Cell cycle; hsa03030 DNA replication;	IPR003593; IPR012340; IPR001208; IPR027417; IPR033762; IPR027925;	AAA+ ATPase domain; Nucleic acid-binding, OB-fold; MCM domain; P-loop containing nucleoside triphosphate hydrolase; MCM OB domain; MCM N-terminal domain;	L	KOG0482	DNA replication licensing factor, MCM7 component
P11388	DNA topoisomerase 2-alpha OS=Homo sapiens OX=9606 GN=TOP2A PE=1 SV=3	2.667	Up	0.0103027	TOP2A	174.38	0.431	0.409	0.396	0.414	0.58	0.542	0.536	0.647	0.734	3.543	0.546	0.702	1.345	2.068	0.917	0.694	nucleus	regulation of cell death; DNA ligation; reproductive process; positive regulation of biosynthetic process; cellular metabolic process; metabolic process; single organism reproductive process; protein metabolic process; macromolecule metabolic process; embryo development; cellular response to stimulus; hematopoietic progenitor cell differentiation; mitotic cell cycle; chromosome segregation; posit…	intracellular organelle; intracellular non-membrane-bounded organelle; intracellular organelle part; cytoplasm; macromolecular complex; nuclear lumen; intracellular part; nucleolus; cell; organelle part; non-membrane-bounded organelle; membrane-enclosed lumen; organelle; condensed chromosome; intracellular membrane-bounded organelle; nucleus; nucleoplasm; intracellular organelle lumen; intracellu…	nucleoside phosphate binding; protein kinase binding; protein dimerization activity; hydrolase activity, acting on acid anhydrides; hydrolase activity; protein binding; chromatin binding; ubiquitin-like protein binding; ATPase activity; organic cyclic compound binding; heterocyclic compound binding; identical protein binding; histone deacetylase binding; DNA topoisomerase II activity; pyrophospha…	K03164	TOP2; DNA topoisomerase II [EC:5.99.1.3]	hsa01524 Platinum drug resistance;	IPR002205; IPR013758; IPR012542; IPR031660; IPR034157; IPR003594; IPR013506; IPR013757; IPR013759; IPR020568; IPR006171; IPR014721; IPR024946; IPR013760;	DNA topoisomerase, type IIA, subunit A/C-terminal; DNA topoisomerase, type IIA, subunit A/ C-terminal, alpha-beta; DTHCT; C-terminal associated domain of TOPRIM; DNA topoisomerase 2, TOPRIM domain; Histidine kinase-like ATPase, C-terminal domain; DNA topoisomerase, type IIA, subunit B, domain 2; Type IIA DNA topoisomerase subunit A, alpha-helical domain; DNA topoisomerase, type IIA, central domai…	B	KOG0355	DNA topoisomerase type II
P49006	MARCKS-related protein OS=Homo sapiens OX=9606 GN=MARCKSL1 PE=1 SV=2	2.002	Up	0.0089775	MARCKSL1	19.529	0.594	0.521	0.473	0.506	0.781	0.644	0.741	0.909	1.569	2.597	0.719	0.574	1.696	1.462	0.884	0.845	nucleus	regulation of cellular process; regulation of biological process; regulation of cell proliferation; positive regulation of cellular process; positive regulation of biological process; biological regulation; positive regulation of cell proliferation;	membrane; extracellular region part; cell periphery; cytoplasm; vesicle; intracellular part; cell; extracellular region; plasma membrane; organelle; extracellular exosome; intracellular; cell part; extracellular vesicle; membrane-bounded organelle; extracellular organelle;	actin binding; protein binding; cytoskeletal protein binding; calmodulin binding; binding;	K13536	MARCKSL1; MARCKS-related protein	hsa04666 Fc gamma R-mediated phagocytosis; hsa05140 Leishmaniasis;
P24844	Myosin regulatory light polypeptide 9 OS=Homo sapiens OX=9606 GN=MYL9 PE=1 SV=4	0.41	Down	0.000119189	MYL9	19.827	0.988	1.101	1.953	1.481	2.791	1.219	1.11	2.126	0.584	0.649	0.963	0.738	0.725	0.449	0.429	0.7	mitochondria	single-multicellular organism process; regulation of biological quality; blood coagulation; muscle system process; single-organism process; response to stimulus; homotypic cell-cell adhesion; hemostasis; regulation of multicellular organismal process; response to wounding; biological adhesion; single organismal cell-cell adhesion; muscle contraction; cell adhesion; regulation of system process; c…	myofibril; cytoplasm; macromolecular complex; supramolecular fiber; intracellular part; Z disc; supramolecular complex; cell; I band; actin filament bundle; organelle part; non-membrane-bounded organelle; cytoskeleton; cell part; intracellular; contractile fiber; myosin II complex; stress fiber; myosin complex; actomyosin; intracellular organelle; intracellular non-membrane-bounded organelle; cyt…	cytoskeletal protein binding; myosin heavy chain binding; binding; ion binding; cation binding; metal ion binding; protein binding; calcium ion binding; myosin binding; structural constituent of muscle; structural molecule activity;	K12755	MYL9; myosin regulatory light chain 9	hsa04921 Oxytocin signaling pathway; hsa04024 cAMP signaling pathway; hsa04670 Leukocyte transendothelial migration; hsa04510 Focal adhesion; hsa04530 Tight junction; hsa04022 cGMP-PKG signaling pathway; hsa04810 Regulation of actin cytoskeleton; hsa04270 Vascular smooth muscle contraction;	IPR011992; IPR002048;	EF-hand domain pair; EF-hand domain;	Z	KOG0031	Myosin regulatory light chain, EF-Hand protein superfamily
O15347	High mobility group protein B3 OS=Homo sapiens OX=9606 GN=HMGB3 PE=1 SV=4	2.261	Up	0.00084476	HMGB3	22.98	0.423	0.528	0.425	0.497	0.654	0.866	0.562	0.67	0.937	2.911	0.73	0.886	1.388	1.392	0.878	1.334	nucleus	nucleic acid-templated transcription; DNA geometric change; single-organism process; biosynthetic process; cellular metabolic process; regulation of RNA biosynthetic process; metabolic process; macromolecule metabolic process; DNA recombination; DNA conformation change; developmental process; regulation of gene expression; heterocycle biosynthetic process; regulation of cellular biosynthetic proc…	organelle; intracellular membrane-bounded organelle; intracellular organelle; nucleus; intracellular non-membrane-bounded organelle; cell part; intracellular; chromosome; cytoplasm; intracellular part; membrane-bounded organelle; cell; non-membrane-bounded organelle;	organic cyclic compound binding; heterocyclic compound binding; DNA binding; RNA binding; double-stranded DNA binding; binding; nucleic acid binding; protein binding; DNA secondary structure binding; DNA binding, bending; four-way junction DNA binding;	K11296			IPR009071;	High mobility group box domain;	R	KOG0381	HMG box-containing protein
O76021	Ribosomal L1 domain-containing protein 1 OS=Homo sapiens OX=9606 GN=RSL1D1 PE=1 SV=3	1.701	Up	0.000183979	RSL1D1	54.972	0.577	0.808	0.69	0.821	0.654	0.774	0.648	0.708	0.905	1.879	1.102	1.021	1.219	1.558	1.066	0.912	nucleus	regulation of cellular process; cellular component biogenesis; osteoblast differentiation; single-multicellular organism process; regulation of cell death; ribonucleoprotein complex biogenesis; cellular aromatic compound metabolic process; regulation of cell aging; cellular developmental process; regulation of programmed cell death; single-organism process; regulation of response to stress; cellu…	intracellular organelle; membrane; intracellular non-membrane-bounded organelle; intracellular organelle part; nuclear lumen; macromolecular complex; intracellular part; nucleolus; cell; organelle part; non-membrane-bounded organelle; preribosome; membrane-enclosed lumen; intracellular membrane-bounded organelle; organelle; 90S preribosome; nucleus; intracellular organelle lumen; intracellular; c…	organic cyclic compound binding; heterocyclic compound binding; cell adhesion molecule binding; RNA binding; binding; cadherin binding; nucleic acid binding; protein binding;	K14775			IPR023674; IPR016094;	Ribosomal protein L1-like; Ribosomal protein L1, 2-layer alpha/beta-sandwich;	S	KOG1685	Uncharacterized conserved protein
Q9BVJ6	U3 small nucleolar RNA-associated protein 14 homolog A OS=Homo sapiens OX=9606 GN=UTP14A PE=1 SV=1	1.689	Up	3.8536e-05	UTP14A	87.977	0.703	0.745	0.693	0.69	0.875	0.607	0.751	0.781	1.28	1.843	0.859	1.062	1.292	1.275	1.109	1.153	nucleus	rRNA metabolic process; RNA processing; ncRNA processing; cellular component biogenesis; ribonucleoprotein complex biogenesis; cellular aromatic compound metabolic process; ribosomal small subunit biogenesis; nitrogen compound metabolic process; ribosome biogenesis; organic cyclic compound metabolic process; primary metabolic process; cellular metabolic process; organic substance metabolic proces…	intracellular organelle; intracellular non-membrane-bounded organelle; cytoplasm; intracellular organelle part; macromolecular complex; nuclear lumen; intracellular part; nucleolus; cytosol; cell; organelle part; non-membrane-bounded organelle; preribosome; organelle; intracellular membrane-bounded organelle; membrane-enclosed lumen; nucleoplasm; nucleus; intracellular organelle lumen; cell part;…	organic cyclic compound binding; heterocyclic compound binding; RNA binding; protein binding; binding; nucleic acid binding;	K14567	UTP14; U3 small nucleolar RNA-associated protein 14	hsa03008 Ribosome biogenesis in eukaryotes;			S	KOG2172	Uncharacterized conserved protein
O60248	Protein SOX-15 OS=Homo sapiens OX=9606 GN=SOX15 PE=1 SV=1	2.659	Up	3.8432e-05	SOX15	25.251	0.579	0.545	0.557	0.618	0.655	0.521	0.243	0.391	1.193	2.169	0.938	1.08	1.371	2.104	0.993	1.079	nucleus	reproductive process; male gonad development; positive regulation of biosynthetic process; negative regulation of muscle tissue development; myoblast differentiation; regulation of myoblast proliferation; regulation of cell cycle process; positive regulation of growth; negative regulation of striated muscle tissue development; single organism reproductive process; positive regulation of wound hea…	intracellular organelle; intracellular organelle part; cytoplasm; macromolecular complex; intracellular part; transcription factor complex; nuclear transcription factor complex; cell; organelle part; organelle; intracellular membrane-bounded organelle; nucleus; intracellular; cell part; membrane-bounded organelle; protein complex; nuclear part;	organic cyclic compound binding; heterocyclic compound binding; RNA polymerase II transcription factor activity, sequence-specific DNA binding; DNA binding; protein heterodimerization activity; binding; protein dimerization activity; nucleic acid binding transcription factor activity; nucleic acid binding; protein binding; chromatin binding; transcription factor activity, sequence-specific DNA bi…	K09271			IPR009071;	High mobility group box domain;	K	KOG0527	HMG-box transcription factor
Q9Y2Y8	Proteoglycan 3 OS=Homo sapiens OX=9606 GN=PRG3 PE=1 SV=2	1.745	Up	0.021904	PRG3	25.405	1.584	0.733	0.583	0.537	0.5	0.86	0.295	0.513	1.652	0.776	0.711	1.406	1.081	0.776	1.029	2.352	extracellular	superoxide metabolic process; leukocyte activation; positive regulation of cytokine biosynthetic process; posttranscriptional regulation of gene expression; imidazole-containing compound metabolic process; positive regulation of biosynthetic process; cellular lipid metabolic process; cellular metabolic process; lipid biosynthetic process; metabolic process; positive regulation of multicellular or…	secretory granule lumen; tertiary granule lumen; intracellular organelle; intracellular vesicle; cytoplasmic vesicle; cytoplasm; intracellular organelle part; vesicle; tertiary granule; cytoplasmic vesicle part; endomembrane system; intracellular part; cell; extracellular region; organelle part; membrane-enclosed lumen; organelle; vesicle lumen; cytoplasmic vesicle lumen; intracellular organelle …	carbohydrate binding; binding;				IPR001304; IPR016187; IPR016186; IPR033816;	C-type lectin-like; C-type lectin fold; C-type lectin-like/link domain; Eosinophil major basic protein, C-type lectin-like domain;	TV	KOG4297	C-type lectin
P04080	Cystatin-B OS=Homo sapiens OX=9606 GN=CSTB PE=1 SV=2	0.499	Down	0.0031781	CSTB	11.139	1.435	1.41	1.486	1.087	0.981	1.677	1.842	1.692	0.771	0.452	1.24	0.613	0.302	0.4	1.213	0.804	cytoplasm	leukocyte activation; single-organism process; establishment of localization; behavior; negative regulation of peptidase activity; myeloid leukocyte activation; single-organism transport; secretion; regulation of endopeptidase activity; leukocyte mediated immunity; regulation of primary metabolic process; neutrophil mediated immunity; single-organism cellular process; regulation of cellular metab…	secretory granule lumen; tertiary granule lumen; extracellular space; extracellular region part; cytoplasmic vesicle; cytoplasm; vesicle; cytoplasmic vesicle part; intracellular part; cell; ficolin-1-rich granule lumen; organelle part; non-membrane-bounded organelle; extracellular exosome; ficolin-1-rich granule; membrane-enclosed lumen; vesicle lumen; intracellular organelle lumen; intracellular…	RNA binding; peptidase regulator activity; protein binding; molecular function regulator; enzyme inhibitor activity; endopeptidase inhibitor activity; cysteine-type endopeptidase inhibitor activity; heterocyclic compound binding; organic cyclic compound binding; protease binding; enzyme regulator activity; binding; nucleic acid binding; peptidase inhibitor activity; endopeptidase regulator activi…	K13907			IPR000010;	Cystatin domain;
Q5JS54	Proteasome assembly chaperone 4 OS=Homo sapiens OX=9606 GN=PSMG4 PE=1 SV=2	1.943	Up	0.0048807	PSMG4	13.775					0.808	0.505	0.546	0.822					1.218	1.521	1.445	1.026	nucleus	cellular component biogenesis; proteasome assembly; cellular component organization; cellular macromolecular complex assembly; protein complex subunit organization; cellular component assembly; macromolecular complex assembly; protein complex biogenesis; cellular process; protein complex assembly; cellular component organization or biogenesis; cellular protein complex assembly; macromolecular com…			K11878
Q9P1F3	Costars family protein ABRACL OS=Homo sapiens OX=9606 GN=ABRACL PE=1 SV=1	2.294	Up	0.00082118	ABRACL	9.0564	0.975	0.769	0.297	0.39	0.517	0.485	0.449	0.637	0.924	2.248	0.659	1.19	0.975	1.813	1.047	1.51	cytoplasm							IPR027817;	Costars domain;	S	KOG3376	Uncharacterized conserved protein
P29972	Aquaporin-1 OS=Homo sapiens OX=9606 GN=AQP1 PE=1 SV=3	0.465	Down	0.000103794	AQP1	28.526	0.98	1.277	2.004	1.649	2.08	1.164	1.382	1.545	0.542	0.482	0.882	0.873	0.864	0.388	0.775	0.813	plasma membrane	regulation of cell death; cellular response to corticosteroid stimulus; response to organophosphorus; nitric oxide transport; cellular metabolic process; regulation of fibroblast proliferation; negative regulation of peptidase activity; metabolic process; carbohydrate derivative biosynthetic process; positive regulation of fibroblast proliferation; regulation of cellular component size; cellular …	basolateral plasma membrane; membrane; cluster of actin-based cell projections; extracellular region part; apical plasma membrane; brush border; organelle membrane; other organism cell; cell periphery; vesicle; cytoplasm; intrinsic component of membrane; intracellular part; integral component of plasma membrane; cell; host; organelle part; host cell; extracellular exosome; nuclear membrane; plasm…	ammonium transmembrane transporter activity; glycerol transmembrane transporter activity; carbohydrate transporter activity; passive transmembrane transporter activity; substrate-specific transporter activity; monovalent inorganic cation transmembrane transporter activity; protein binding; channel activity; substrate-specific transmembrane transporter activity; metal ion transmembrane transporter…	K09864	AQP1; aquaporin-1	hsa04924 Renin secretion; hsa04976 Bile secretion; hsa04964 Proximal tubule bicarbonate reclamation;	IPR023271;	Aquaporin-like;	G	KOG0223	Aquaporin (major intrinsic protein family)
Q9C005	Protein dpy-30 homolog OS=Homo sapiens OX=9606 GN=DPY30 PE=1 SV=1	1.708	Up	0.023436	DPY30	11.25	0.758	0.725	0.691	0.745					1.181	1.703	1.123	0.978					cytoplasm	nucleic acid-templated transcription; single-organism process; biosynthetic process; negative regulation of RNA metabolic process; cellular metabolic process; methylation; establishment of localization; regulation of RNA biosynthetic process; protein alkylation; metabolic process; chromatin silencing at telomere; negative regulation of macromolecule biosynthetic process; macromolecule metabolic p…	chromosome, telomeric region; cytoplasm; macromolecular complex; intracellular part; cell; organelle part; chromosomal part; non-membrane-bounded organelle; membrane-enclosed lumen; catalytic complex; nucleoplasm; intracellular organelle lumen; intracellular; cell part; chromosome; Golgi subcompartment; Golgi apparatus part; Set1C/COMPASS complex; membrane-bounded organelle; nucleoplasm part; org…	S-adenosylmethionine-dependent methyltransferase activity; methyltransferase activity; protein dimerization activity; protein-lysine N-methyltransferase activity; lysine N-methyltransferase activity; transferase activity, transferring one-carbon groups; protein binding; histone-lysine N-methyltransferase activity; identical protein binding; protein methyltransferase activity; histone methyltransf…	K14965					K	KOG4109	Histone H3 (Lys4) methyltransferase complex, subunit CPS25/DPY-30
P02788	Lactotransferrin OS=Homo sapiens OX=9606 GN=LTF PE=1 SV=6	1.95	Up	0.0092621	LTF	78.181	0.532	1.193	0.47	0.507	1.524	0.326	0.284	0.596	1.521	1.168	1.04	1.541	2.047	0.504	1.407	1.367	extracellular	regulation of cell death; regulation of tumor necrosis factor production; defense response to other organism; positive regulation of biomineral tissue development; regulation of defense response; cellular metabolic process; response to biotic stimulus; regulation of protein serine/threonine kinase activity; metabolic process; regulation of I-kappaB kinase/NF-kappaB signaling; positive regulation …	secretory granule lumen; tertiary granule lumen; extracellular space; extracellular region part; cytoplasmic vesicle; cytoplasm; vesicle; cytoplasmic vesicle part; macromolecular complex; intracellular part; cell; organelle part; extracellular exosome; membrane-enclosed lumen; vesicle lumen; intracellular organelle lumen; intracellular; cell part; secretory vesicle; extracellular vesicle; secreto…	peptidase activity; serine-type peptidase activity; hydrolase activity; protein binding; kinase regulator activity; molecular function regulator; heparin binding; heterocyclic compound binding; organic cyclic compound binding; kinase activator activity; catalytic activity; binding; cation binding; anion binding; glycosaminoglycan binding; enzyme activator activity; DNA binding; iron ion binding; …	K17283			IPR001156;	Transferrin-like domain;
Q9BUP0	EF-hand domain-containing protein D1 OS=Homo sapiens OX=9606 GN=EFHD1 PE=1 SV=1	0.498	Down	2.0206e-05	EFHD1	26.927	1.444	1.347	1.495	1.559	1.25	1.026	2.196	1.31	0.603	0.584	0.763	0.771	1.135	0.564	0.737	0.628	nucleus	developmental process; nervous system development; cellular component organization; single-multicellular organism process; generation of neurons; system development; neuron development; cellular developmental process; single-organism cellular process; single-organism process; neurogenesis; neuron projection development; multicellular organismal process; cell development; neuron differentiation; c…	intracellular organelle; membrane; extracellular region part; mitochondrial part; organelle membrane; organelle envelope; intracellular organelle part; cytoplasm; vesicle; intracellular part; cell; extracellular region; organelle part; mitochondrion; intracellular membrane-bounded organelle; mitochondrial envelope; organelle; extracellular exosome; intracellular; cell part; envelope; organelle in…	metal ion binding; cation binding; calcium ion binding; binding; ion binding;				IPR011992; IPR002048;	EF-hand domain pair; EF-hand domain;	R	KOG0041	Predicted Ca2+-binding protein, EF-Hand protein superfamily
Q15147	"""1-phosphatidylinositol 4,5-bisphosphate phosphodiesterase beta-4 OS=Homo sapiens OX=9606 GN=PLCB4 PE=1 SV=3"""	0.305	Down	2.6061e-07	PLCB4	134.46	1.273	1.795	2.168	1.311	2.31	1.659	1.259	1.952	0.648	0.376	0.712	0.405	0.639	0.584	0.303	0.522	nucleus	regulation of cellular process; single organism signaling; cellular response to stimulus; lipid catabolic process; organic hydroxy compound metabolic process; intracellular signal transduction; alcohol metabolic process; single-organism catabolic process; small molecule metabolic process; single-organism cellular process; single-organism process; signaling; response to stimulus; primary metabolic…	smooth endoplasmic reticulum; intracellular organelle; dendrite; endoplasmic reticulum; cell projection; cytoplasm; endomembrane system; intracellular part; cytosol; cell; asymmetric synapse; synapse; intracellular membrane-bounded organelle; organelle; nucleus; somatodendritic compartment; postsynapse; cell part; intracellular; postsynaptic density; neuron projection; postsynaptic specialization…	phospholipase C activity; ion binding; protein binding; hydrolase activity; lipase activity; signal transducer activity; phosphatidylinositol phospholipase C activity; phosphoric ester hydrolase activity; catalytic activity; binding; hydrolase activity, acting on ester bonds; phospholipase activity; metal ion binding; cation binding; phosphoric diester hydrolase activity; calcium ion binding;	K05858	PLCB; phosphatidylinositol phospholipase C, beta [EC:3.1.4.11]	hsa04072 Phospholipase D signaling pathway; hsa04015 Rap1 signaling pathway; hsa04723 Retrograde endocannabinoid signaling; hsa01100 Metabolic pathways; hsa04022 cGMP-PKG signaling pathway; hsa04924 Renin secretion; hsa04911 Insulin secretion; hsa04970 Salivary secretion; hsa04724 Glutamatergic synapse; hsa00562 Inositol phosphate metabolism; hsa05200 Pathways in cancer; hsa04071 Sphingolipid sig…	IPR015359; IPR000909; IPR017946; IPR011993; IPR011992; IPR000008; IPR001711;	Phosphoinositide-specific phospholipase C, EF-hand-like domain; Phosphatidylinositol-specific phospholipase C, X domain; PLC-like phosphodiesterase, TIM beta/alpha-barrel domain; PH domain-like; EF-hand domain pair; C2 domain; Phospholipase C, phosphatidylinositol-specific, Y domain;	I	KOG1265	Phospholipase C
Q96RS6	NudC domain-containing protein 1 OS=Homo sapiens OX=9606 GN=NUDCD1 PE=1 SV=2	1.573	Up	0.0032355	NUDCD1	66.755	0.761	0.764	0.72	0.821	0.767	0.682	0.799	0.915	1.436	1.538	1.2	0.888	1.135	1.764	1.05	0.787	cytoplasm	immune system process;	intracellular organelle; cytoplasm; intracellular organelle part; nuclear lumen; intracellular part; cytosol; cell; organelle part; organelle; intracellular membrane-bounded organelle; membrane-enclosed lumen; nucleoplasm; nucleus; intracellular organelle lumen; cell part; intracellular; membrane-bounded organelle; cytoplasmic part; organelle lumen; nuclear part;	protein binding; binding;				IPR007052; IPR008978;	CS domain; HSP20-like chaperone;	S	KOG4379	Uncharacterized conserved protein (tumor antigen CML66 in humans)
Q15084	Protein disulfide-isomerase A6 OS=Homo sapiens OX=9606 GN=PDIA6 PE=1 SV=1	1.52	Up	2.1583e-05	PDIA6	48.121	0.906	0.933	0.801	0.795	0.725	0.763	0.701	0.675	1.308	1.249	0.869	1.214	1.088	1.251	1.156	1.437	extracellular	single organism signaling; regulation of cellular process; cellular response to stress; regulation of biological quality; cellular response to topologically incorrect protein; response to endoplasmic reticulum stress; cellular response to organic substance; cell redox homeostasis; single-organism process; IRE1-mediated unfolded protein response; response to stimulus; endoplasmic reticulum unfolde…	membrane; nuclear outer membrane-endoplasmic reticulum membrane network; extracellular region part; endoplasmic reticulum; cytoplasmic vesicle; cell periphery; vesicle; cytoplasm; macromolecular complex; intracellular part; cell; organelle part; pigment granule; extracellular exosome; membrane-enclosed lumen; intracellular organelle lumen; membrane part; cell part; intracellular; extracellular ve…	intramolecular oxidoreductase activity, transposing S-S bonds; protein binding; isomerase activity; intramolecular oxidoreductase activity; protein disulfide isomerase activity; catalytic activity; binding;	K09584	PDIA6; protein disulfide-isomerase A6 [EC:5.3.4.1]	hsa04141 Protein processing in endoplasmic reticulum;	IPR005788; IPR012336; IPR013766;	Disulphide isomerase; Thioredoxin-like fold; Thioredoxin domain;	O	KOG0191	Thioredoxin/protein disulfide isomerase
P09493	Tropomyosin alpha-1 chain OS=Homo sapiens OX=9606 GN=TPM1 PE=1 SV=2	0.353	Down	9.8581e-05	TPM1	32.708	0.969	1.051	2.59	1.542	1.97	1.269	1.295	1.991	0.361	0.451	0.988	0.655	0.752	0.557	0.233	0.473	cytoplasm	cellular component biogenesis; regulation of biological quality; positive regulation of blood pressure; positive regulation of heart rate by epinephrine; chordate embryonic development; muscle tissue morphogenesis; cellular component morphogenesis; negative regulation of cell proliferation; actin cytoskeleton organization; heart development; positive regulation of multicellular organismal process…	membrane; cell periphery; myofibril; ruffle membrane; cytoplasm; macromolecular complex; intracellular part; supramolecular fiber; bleb; supramolecular complex; cell; actin filament bundle; organelle part; muscle thin filament tropomyosin; non-membrane-bounded organelle; cytoskeleton; plasma membrane region; leading edge membrane; intracellular; cell part; membrane part; contractile fiber; actin …	actin filament binding; cytoskeletal protein binding; structural constituent of cytoskeleton; binding; macromolecular complex binding; actin binding; protein binding; structural constituent of muscle; structural molecule activity; protein complex binding;	K10373	TPM1; tropomyosin 1	hsa04260 Cardiac muscle contraction; hsa04261 Adrenergic signaling in cardiomyocytes; hsa05206 MicroRNAs in cancer; hsa05414 Dilated cardiomyopathy; hsa05410 Hypertrophic cardiomyopathy (HCM);			Z	KOG1003	Actin filament-coating protein tropomyosin
O95347	Structural maintenance of chromosomes protein 2 OS=Homo sapiens OX=9606 GN=SMC2 PE=1 SV=2	1.752	Up	0.00030474	SMC2	135.65	0.59	0.605	0.592	0.663	0.717	0.8	0.875	0.666	0.929	2.249	0.965	1.059	1.185	1.154	1.033	1.076	cytoplasm	reproduction; cellular component organization; meiotic cell cycle process; reproductive process; organelle fission; mitotic nuclear division; single-organism process; mitotic cell cycle process; chromosome condensation; sister chromatid segregation; DNA packaging; meiotic chromosome condensation; single organism reproductive process; cellular process; meiotic chromosome segregation; DNA conformat…	extracellular region part; vesicle; cytoplasm; macromolecular complex; intracellular part; cell; organelle part; chromosomal part; non-membrane-bounded organelle; condensed chromosome; extracellular exosome; membrane-enclosed lumen; nucleoplasm; condensin complex; intracellular organelle lumen; intracellular; cell part; chromosome; extracellular vesicle; membrane-bounded organelle; DNA packaging …	ATP binding; nucleoside phosphate binding; protein heterodimerization activity; protein dimerization activity; nucleoside binding; ion binding; protein binding; nucleotide binding; organic cyclic compound binding; heterocyclic compound binding; ribonucleoside binding; carbohydrate derivative binding; ribonucleotide binding; binding; purine ribonucleoside binding; anion binding; purine ribonucleot…	K06674			IPR010935; IPR027417; IPR003395;	SMCs flexible hinge; P-loop containing nucleoside triphosphate hydrolase; RecF/RecN/SMC, N-terminal;	BD	KOG0933	Structural maintenance of chromosome protein 2 (chromosome condensation complex Condensin, subunit E)
P19652	Alpha-1-acid glycoprotein 2 OS=Homo sapiens OX=9606 GN=ORM2 PE=1 SV=2	0.547	Down	0.00044022	ORM2	23.602	1.17	2.089	1.126	1.069	2.188	1.151	1.125	1.005	0.718	0.787	0.807	0.597	0.959	0.563	0.766	0.78	extracellular	leukocyte activation; neutrophil activation involved in immune response; immune effector process; platelet degranulation; single-organism process; response to stimulus; establishment of localization; myeloid cell activation involved in immune response; single-organism localization; granulocyte activation; cellular process; myeloid leukocyte activation; single-organism transport; secretion; leukoc…	secretory granule lumen; extracellular space; extracellular region part; cytoplasmic vesicle; cytoplasm; vesicle; cytoplasmic vesicle part; intracellular part; azurophil granule lumen; cell; organelle part; vacuolar lumen; membrane-enclosed lumen; extracellular exosome; vesicle lumen; intracellular organelle lumen; cell part; intracellular; lysosome; secretory vesicle; extracellular vesicle; secr…		K17308			IPR000566; IPR012674; IPR011038;	Lipocalin/cytosolic fatty-acid binding domain; Calycin; Calycin-like;
Q15021	Condensin complex subunit 1 OS=Homo sapiens OX=9606 GN=NCAPD2 PE=1 SV=3	1.874	Up	0.00045733	NCAPD2	157.18	0.596	0.851	0.565	0.819	0.615	0.781	0.579	0.624	1.129	1.869	1.001	0.998	1.885	1.528	0.779	0.987	nucleus	reproduction; cellular component organization; meiotic cell cycle process; reproductive process; organelle fission; mitotic nuclear division; single-organism process; mitotic cell cycle process; chromosome condensation; sister chromatid segregation; DNA packaging; meiotic chromosome condensation; single organism reproductive process; cellular process; DNA conformation change; mitotic cell cycle; …	membrane; cytoplasm; macromolecular complex; intracellular part; cell; organelle part; chromosomal part; non-membrane-bounded organelle; membrane-enclosed lumen; condensed chromosome; nucleoplasm; condensin complex; intracellular organelle lumen; nuclear chromosome part; cell part; intracellular; chromosome; condensin core heterodimer; membrane-bounded organelle; DNA packaging complex; nuclear co…	histone binding; protein binding; chromatin binding; binding;	K06677			IPR032682; IPR011989; IPR016024; IPR024324;	Condensin complex subunit 1, C-terminal; Armadillo-like helical; Armadillo-type fold; Condensin complex subunit 1, N-terminal;	BD	KOG0414	Chromosome condensation complex Condensin, subunit D2
Q08AI8	Uncharacterized protein C2orf54 OS=Homo sapiens OX=9606 GN=C2orf54 PE=2 SV=2	0.511	Down	1.98516e-05	C2orf54	49.564	1.46	1.174	1.446	1.126	1.363	1.759	1.485	1.761	0.845	0.601	0.984	0.76	0.584	0.457	0.943	0.743	plasma membrane							IPR024810;	Mab-21 domain;
Q9Y6C2	EMILIN-1 OS=Homo sapiens OX=9606 GN=EMILIN1 PE=1 SV=3	0.585	Down	2.5292e-06	EMILIN1	106.67	1.289	1.558	1.198	1.362	1.419	1.085	1.488	1.387	0.722	0.677	0.822	0.835	1.105	0.679	0.623	0.844	extracellular	cell adhesion; biological adhesion;	extracellular matrix; extracellular exosome; organelle; extracellular space; extracellular region part; vesicle; extracellular vesicle; proteinaceous extracellular matrix; macromolecular complex; protein complex; membrane-bounded organelle; extracellular region; collagen trimer; extracellular organelle;	extracellular matrix constituent conferring elasticity; extracellular matrix structural constituent; protein binding; identical protein binding; structural molecule activity; binding; structural molecule activity conferring elasticity;				IPR008983; IPR011489; IPR001073;	Tumour necrosis factor-like domain; EMI domain; C1q domain;
P04275	von Willebrand factor OS=Homo sapiens OX=9606 GN=VWF PE=1 SV=4	0.579	Down	0.000196889	VWF	309.26	0.976	1.068	1.258	1.814	1.035	1.17	1.985	1.521	0.847	0.735	0.94	0.827	0.817	0.619	0.738	0.742	extracellular	cellular component biogenesis; cellular component organization; single-multicellular organism process; blood coagulation; regulation of biological quality; protein homooligomerization; platelet degranulation; single-organism process; response to stimulus; hemostasis; establishment of localization; protein oligomerization; organic substance metabolic process; response to wounding; biological adhes…	secretory granule lumen; extracellular region part; endoplasmic reticulum; cytoplasmic vesicle; vesicle; cytoplasm; cytoplasmic vesicle part; intracellular part; cell; organelle part; membrane-enclosed lumen; extracellular exosome; vesicle lumen; intracellular organelle lumen; clathrin-coated vesicle; intracellular; cell part; secretory vesicle; extracellular vesicle; secretory granule; membrane-…	protein N-terminus binding; immunoglobulin binding; receptor binding; chaperone binding; protein dimerization activity; macromolecular complex binding; protein binding; integrin binding; protease binding; cell adhesion molecule binding; carbohydrate derivative binding; identical protein binding; binding; protein homodimerization activity; collagen binding; glycoprotein binding; enzyme binding; pr…	K03900	VWF; von Willebrand factor	hsa04611 Platelet activation; hsa04151 PI3K-Akt signaling pathway; hsa04610 Complement and coagulation cascades; hsa04510 Focal adhesion; hsa04512 ECM-receptor interaction;	IPR032361; IPR014853; IPR002919; IPR001007; IPR001846; IPR006207; IPR002035;	von Willebrand factor, VWA N-terminal domain; Uncharacterised domain, cysteine-rich; Trypsin Inhibitor-like, cysteine rich domain; VWFC domain; von Willebrand factor, type D domain; Cystine knot, C-terminal; von Willebrand factor, type A;	WV	KOG1216	von Willebrand factor and related coagulation proteins
A6NDG6	Glycerol-3-phosphate phosphatase OS=Homo sapiens OX=9606 GN=PGP PE=1 SV=1	1.63	Up	0.00027874	PGP	34.006	0.585	0.66	0.805	0.939	0.594	1.01	0.689	0.679	1.041	1.436	1.188	1.344	0.906	1.642	0.964	1.197	extracellular	glycerolipid metabolic process; alcohol metabolic process; single-organism process; cellular lipid metabolic process; biosynthetic process; cellular metabolic process; phosphate-containing compound metabolic process; metabolic process; cellular carbohydrate metabolic process; glycerophospholipid metabolic process; protein metabolic process; macromolecule metabolic process; cellular carbohydrate b…	cell part; intracellular; cytoplasm; intracellular part; cytosol; cell; cytoplasmic part;	magnesium ion binding; glycerol-3-phosphatase activity; phosphatase activity; ion binding; glycerol-1-phosphatase activity; hydrolase activity; phosphoprotein phosphatase activity; phosphoric ester hydrolase activity; catalytic activity; protein tyrosine phosphatase activity; binding; nucleotide phosphatase activity, acting on free nucleotides; hydrolase activity, acting on ester bonds; cation bi…	K19269	PGP; phosphoglycolate phosphatase [EC:3.1.3.18 3.1.3.48]	hsa01100 Metabolic pathways; hsa01200 Carbon metabolism; hsa00630 Glyoxylate and dicarboxylate metabolism;	IPR023215; IPR023214;	Nitrophenylphosphatase-like domain; HAD-like domain;	P	KOG2882	p-Nitrophenyl phosphatase
Q53FP2	Transmembrane protein 35A OS=Homo sapiens OX=9606 GN=TMEM35A PE=2 SV=2	0.489	Down	2.3687e-05	TMEM35A	18.44	1.109	1.362	1.511	1.246	2.465	1.303	1.173	1.559	0.802	0.706	0.878	0.841	0.717	0.552	0.484	0.755	extracellular		microbody membrane; intracellular vesicle; intracellular organelle; membrane; bounding membrane of organelle; peroxisomal part; organelle membrane; cytoplasmic vesicle; peroxisome; intracellular organelle part; cytoplasm; vesicle; microbody part; intrinsic component of membrane; intracellular part; cell; integral component of membrane; organelle part; peroxisomal membrane; intracellular membrane-…
P05155	Plasma protease C1 inhibitor OS=Homo sapiens OX=9606 GN=SERPING1 PE=1 SV=2	0.648	Down	0.000124233	SERPING1	55.154	1.271	1.532	1.205	1.115	1.815	1.313	1.066	0.988	0.873	0.825	0.827	0.738	0.944	0.677	0.862	0.927	extracellular	immunoglobulin mediated immune response; blood coagulation; regulation of biological quality; negative regulation of immune effector process; negative regulation of protein maturation; negative regulation of complement activation; regulation of defense response; fibrinolysis; complement activation; negative regulation of peptidase activity; metabolic process; negative regulation of response to ex…	secretory granule lumen; extracellular space; extracellular region part; cytoplasmic vesicle; cytoplasm; vesicle; cytoplasmic vesicle part; intracellular part; cell; organelle part; membrane-enclosed lumen; extracellular exosome; vesicle lumen; intracellular organelle lumen; cell part; intracellular; secretory vesicle; extracellular vesicle; secretory granule; membrane-bounded organelle; organell…	serine-type endopeptidase inhibitor activity; enzyme regulator activity; binding; peptidase inhibitor activity; peptidase regulator activity; protein binding; endopeptidase regulator activity; enzyme inhibitor activity; molecular function regulator; endopeptidase inhibitor activity;	K04001	SERPING1; C1 inhibitor	hsa05133 Pertussis; hsa04610 Complement and coagulation cascades;	IPR023796;	Serpin domain;	V	KOG2392	Serpin
Q8NF37	Lysophosphatidylcholine acyltransferase 1 OS=Homo sapiens OX=9606 GN=LPCAT1 PE=1 SV=2	2.165	Up	7.7922e-05	LPCAT1	59.151	0.554	0.565	0.569	0.627	0.938	0.651	0.547	0.394	1.195	1.707	1.095	1.261	2.128	0.778	1.068	1.256	mitochondria	negative regulation of phospholipid biosynthetic process; regulation of biological quality; leukocyte activation; cellular lipid metabolic process; regulation of lipid metabolic process; cellular metabolic process; triglyceride biosynthetic process; lipid biosynthetic process; metabolic process; acylglycerol metabolic process; single-organism transport; secretion; leukocyte mediated immunity; reg…	membrane; nuclear outer membrane-endoplasmic reticulum membrane network; endoplasmic reticulum; cytoplasmic vesicle; organelle membrane; cell periphery; vesicle; cytoplasm; cytoplasmic vesicle part; intrinsic component of membrane; intracellular part; cell; organelle part; non-membrane-bounded organelle; lysosomal membrane; membrane part; intracellular; cell part; whole membrane; lysosome; secret…	1-alkylglycerophosphocholine O-acetyltransferase activity; 1-acylglycerol-3-phosphate O-acyltransferase activity; acylglycerol O-acyltransferase activity; ion binding; O-acetyltransferase activity; transferase activity, transferring acyl groups other than amino-acyl groups; acetyltransferase activity; 2-acylglycerol-3-phosphate O-acyltransferase activity; transferase activity, transferring acyl g…	K13510	LPCAT1_2; lysophosphatidylcholine acyltransferase / lyso-PAF acetyltransferase [EC:2.3.1.23 2.3.1.67]	hsa00564 Glycerophospholipid metabolism; hsa01100 Metabolic pathways; hsa00565 Ether lipid metabolism;	IPR002123; IPR002048; IPR011992;	Phospholipid/glycerol acyltransferase; EF-hand domain; EF-hand domain pair;	I	KOG4666	Predicted phosphate acyltransferase, contains PlsC domain
Q96FV9	THO complex subunit 1 OS=Homo sapiens OX=9606 GN=THOC1 PE=1 SV=1	1.733	Up	0.032638	THOC1	75.665	0.685	0.542	0.502	0.56	1.05	0.916	0.847	0.758	3.077	1.291	0.818	0.56	1.005	1.212	1.021	1.174	nucleus	single organism signaling; RNA transport; regulation of leukocyte activation; regulation of isotype switching; nucleic acid-templated transcription; positive regulation of biosynthetic process; negative regulation of immune effector process; nuclear transport; cellular metabolic process; protein transport; multi-organism intracellular transport; metabolic process; nucleobase-containing compound t…	intracellular organelle; extracellular region part; intracellular organelle part; cytoplasm; nuclear lumen; macromolecular complex; intracellular part; THO complex; cytosol; nuclear body; THO complex part of transcription export complex; cell; extracellular region; organelle part; membrane-enclosed lumen; organelle; intracellular membrane-bounded organelle; nucleoplasm; nucleus; intracellular org…	organic cyclic compound binding; heterocyclic compound binding; RNA binding; DNA binding; binding; nucleic acid binding; protein binding;	K12878	THOC1; THO complex subunit 1	hsa03040 Spliceosome; hsa03013 RNA transport;	IPR000488; IPR011029;	Death domain; Death-like domain;	Y	KOG2491	Nuclear matrix protein
Q9BPY8	Homeodomain-only protein OS=Homo sapiens OX=9606 GN=HOPX PE=1 SV=1	0.437	Down	0.00023869	HOPX	8.26	1.402	1.181	1.552	1.319	1.011	1.2	2.184	2.429	0.601	0.468	1.152	0.778	0.446	0.37	0.908	0.642	cytoplasm	negative regulation of developmental process; nucleic acid-templated transcription; chordate embryonic development; cellular developmental process; single-organism process; biosynthetic process; cellular metabolic process; regulation of RNA biosynthetic process; metabolic process; macromolecule metabolic process; negative regulation of cell differentiation; embryo development; developmental proce…	organelle; intracellular membrane-bounded organelle; intracellular organelle; nucleus; cell part; intracellular; cytoplasm; intracellular part; membrane-bounded organelle; cell;	organic cyclic compound binding; heterocyclic compound binding; DNA binding; protein binding; binding; nucleic acid binding;				IPR001356; IPR009057;	Homeobox domain; Homeobox domain-like;	R	KOG0490	Transcription factor, contains HOX domain
Q15847	Adipogenesis regulatory factor OS=Homo sapiens OX=9606 GN=ADIRF PE=1 SV=1	0.648	Down	0.00033737	ADIRF	7.8547	1.19	1.468	1.2	1.29	1.252	0.912	1.407	1.611	0.754	0.846	0.962	0.645	0.646	1.005	1.093	0.738	cytoplasm	response to cisplatin; nucleic acid-templated transcription; cellular developmental process; positive regulation of biosynthetic process; single-organism process; biosynthetic process; cellular metabolic process; regulation of RNA biosynthetic process; metabolic process; positive regulation of metabolic process; positive regulation of nitrogen compound metabolic process; response to radiation; po…	intracellular organelle; extracellular region part; cytoplasm; intracellular organelle part; vesicle; nuclear lumen; intracellular part; cytosol; cell; extracellular region; organelle part; membrane-enclosed lumen; organelle; extracellular exosome; intracellular membrane-bounded organelle; nucleus; nucleoplasm; intracellular organelle lumen; intracellular; cell part; extracellular vesicle; membra…
O43491	Band 4.1-like protein 2 OS=Homo sapiens OX=9606 GN=EPB41L2 PE=1 SV=1	0.573	Down	7.7538e-07	EPB41L2	112.59	1.218	1.317	1.425	1.37	1.324	1.375	1.426	1.417	0.698	0.722	0.809	0.851	0.976	0.824	0.703	0.647	nucleus	actomyosin structure organization; cellular component organization; single-organism organelle organization; actin cytoskeleton organization; cortical actin cytoskeleton organization; organelle organization; actin filament-based process; single-organism cellular process; single-organism process; cortical cytoskeleton organization; cytoskeleton organization; cellular process; cellular component org…	membrane; extracellular region part; cell cortex; extrinsic component of membrane; cell periphery; cell junction; cytoplasmic region; vesicle; cytoplasm; cortical cytoskeleton; cortical actin cytoskeleton; intracellular part; cell; organelle part; non-membrane-bounded organelle; membrane-enclosed lumen; cytoskeleton; extracellular exosome; nucleoplasm; focal adhesion; intracellular organelle lume…	cytoskeletal protein binding; structural constituent of cytoskeleton; PH domain binding; binding; actin binding; protein binding; protein domain specific binding; structural molecule activity; spectrin binding;	K06107			IPR019748; IPR018980; IPR019749; IPR018979; IPR008379; IPR029071; IPR011993; IPR007477; IPR014847; IPR000299; IPR014352;	FERM central domain; FERM, C-terminal PH-like domain; Band 4.1 domain; FERM, N-terminal; Band 4.1, C-terminal; Ubiquitin-related domain; PH domain-like; SAB domain; FERM adjacent (FA); FERM domain; FERM/acyl-CoA-binding protein, 3-helical bundle;	R	KOG3527	Erythrocyte membrane protein 4.1 and related proteins of the ERM family
[truncated: 813 more rows]

## Sheet: Table S3
Table S3. Motif logo and model
Motif Logo				Motif	Motif Score	Foreground		Background		Fold Increase
						Matches	Size	Matches	Size
				xxxxxxxxxx_N_xTxxxxxxxx	16.00	958	1836	24879	380569	8.0
				xxxxxxxxxx_N_CSxxxxxxxx	25.56	55	878	1076	355690	20.7
				xxxRxxxxxx_N_xSxxxxxxxx	23.48	65	823	1677	354614	16.7
				xxxxxxxxxx_N_ASxxxxxxxx	23.28	66	758	1852	352937	16.6
				xxxxxxxxxR_N_xSxxxxxxxx	22.13	56	692	1703	351085	16.7
				xxxxxxxxxx_N_xSxxxxxxxx	16.00	415	636	27064	349382	8.4
				xxxxxxxxxx_N_Gxxxxxxxxx	15.30	52	221	21056	322318	3.6
Amino	-10	-9	-8	-7	-6	-5	-4	-3	-2	-1	N	1	2	3	4	5	6	7	8	9	10
[truncated: 20 more rows]

## Sheet: Table S4
Table S4. Differentially expressed glycoproteins and glycosylation sites in normalized N-glycoproteomics (fold change>1.5 and p value <0.05)
[truncated: 265 more rows]

[truncated: 4 more sheets: Table S5, Table S6, Table S7, Table S8]
